# Supplementary material
Source: PubMed Central journal article supplement (PMC5708127)
Supplement: NIHMS894348-supplement-Supp_TableS1.pdf [file NIHMS894348-supplement-Supp_TableS1.pdf]

**Supplementary Table S1.** List of 300 genes included in the targeted capture massively parallel sequencing assay and frequency of mutations affecting these genes in endometrial clear cell carcinomas from this study and endometrial endometrioid and endometrial serous carcinomas from The Cancer Genome Atlas (TCGA) dataset.

| Gene Symbol | Endometrial Clear Cell Carcinomas (n=30) |                   | Endometrial Endometrioid Carcinomas from TCGA (n=200) |                   | p-value | adjusted p-value | Endometrial serous carcinomas from TCGA (n=44) |                   | p-value | adjusted p-value | Endometrial Clear Cell Carcinomas without POLE cases (n=28) |                   | Endometrial Endometrioid Carcinomas from TCGA without POLE (n=183) |                   | p-value | adjusted p-value | Endometrial serous carcinomas from TCGA (n=44) |                   | p-value | adjusted p-value |
|-------------|------------------------------------------|-------------------|-------------------------------------------------------|-------------------|---------|------------------|------------------------------------------------|-------------------|---------|------------------|-------------------------------------------------------------|-------------------|--------------------------------------------------------------------|-------------------|---------|------------------|------------------------------------------------|-------------------|---------|------------------|
|             | Cases altered (n)                        | Cases altered (%) | Cases altered (n)                                     | Cases altered (%) |         |                  | Cases altered (n)                              | Cases altered (%) |         |                  | Cases altered (n)                                           | Cases altered (%) | Cases altered (n)                                                  | Cases altered (%) |         |                  | Cases altered (n)                              | Cases altered (%) |         |                  |
| ABL1        | 2                                        | 6.67%             | 8                                                     | 4.00%             | 0.6233  | 1.0000           | 0                                              | 0.00%             | 0.1611  | 0.5388           | 1                                                           | 3.57%             | 6                                                                  | 3.28%             | 1.0000  | 1.0000           | 0                                              | 0.00%             | 0.3889  | 1.0000           |
| ABL2        | 1                                        | 3.33%             | 13                                                    | 6.50%             | 0.7009  | 1.0000           | 2                                              | 4.55%             | 1.0000  | 1.0000           | 0                                                           | 0.00%             | 4                                                                  | 2.19%             | 1.0000  | 1.0000           | 2                                              | 4.55%             | 0.5180  | 1.0000           |
| AKT1        | 3                                        | 10.00%            | 4                                                     | 2.00%             | 0.0490  | 0.8796           | 0                                              | 0.00%             | 0.0626  | 0.5388           | 1                                                           | 3.57%             | 3                                                                  | 1.64%             | 0.4367  | 1.0000           | 0                                              | 0.00%             | 0.3889  | 1.0000           |
| AKT2        | 2                                        | 6.67%             | 6                                                     | 3.00%             | 0.2802  | 1.0000           | 0                                              | 0.00%             | 0.1611  | 0.5388           | 0                                                           | 0.00%             | 1                                                                  | 0.55%             | 1.0000  | 1.0000           | 0                                              | 0.00%             | 1.0000  | 1.0000           |
| AKT3        | 1                                        | 3.33%             | 8                                                     | 4.00%             | 1.0000  | 1.0000           | 1                                              | 2.27%             | 1.0000  | 1.0000           | 1                                                           | 3.57%             | 1                                                                  | 0.55%             | 0.2483  | 1.0000           | 1                                              | 2.27%             | 1.0000  | 1.0000           |
| ALK         | 2                                        | 6.67%             | 15                                                    | 7.50%             | 1.0000  | 1.0000           | 1                                              | 2.27%             | 0.5622  | 0.7871           | 0                                                           | 0.00%             | 7                                                                  | 3.83%             | 0.5976  | 1.0000           | 1                                              | 2.27%             | 1.0000  | 1.0000           |
| ALOX12B     | 3                                        | 10.00%            | 7                                                     | 3.50%             | 0.1275  | 1.0000           | 1                                              | 2.27%             | 0.2971  | 0.6561           | 1                                                           | 3.57%             | 2                                                                  | 1.09%             | 0.3490  | 1.0000           | 1                                              | 2.27%             | 1.0000  | 1.0000           |
| APC         | 4                                        | 13.33%            | 27                                                    | 13.50%            | 1.0000  | 1.0000           | 2                                              | 4.55%             | 0.2151  | 0.6561           | 2                                                           | 7.14%             | 12                                                                 | 6.56%             | 1.0000  | 1.0000           | 2                                              | 4.55%             | 0.6395  | 1.0000           |
| AR          | 2                                        | 6.67%             | 14                                                    | 7.00%             | 1.0000  | 1.0000           | 0                                              | 0.00%             | 0.1611  | 0.5388           | 0                                                           | 0.00%             | 7                                                                  | 3.83%             | 0.5976  | 1.0000           | 0                                              | 0.00%             | 1.0000  | 1.0000           |
| ARAF        | 1                                        | 3.33%             | 10                                                    | 5.00%             | 1.0000  | 1.0000           | 0                                              | 0.00%             | 0.4054  | 0.6561           | 0                                                           | 0.00%             | 3                                                                  | 1.64%             | 1.0000  | 1.0000           | 0                                              | 0.00%             | 1.0000  | 1.0000           |
| ARHGAP26    | 1                                        | 3.33%             | 7                                                     | 3.50%             | 1.0000  | 1.0000           | 0                                              | 0.00%             | 0.4054  | 0.6561           | 0                                                           | 0.00%             | 1                                                                  | 0.55%             | 1.0000  | 1.0000           | 0                                              | 0.00%             | 1.0000  | 1.0000           |
| ARID1A      | 8                                        | 26.67%            | 78                                                    | 39.00%            | 0.2282  | 1.0000           | 4                                              | 9.09%             | 0.0577  | 0.5388           | 6                                                           | 21.43%            | 65                                                                 | 35.52%            | 0.1972  | 1.0000           | 4                                              | 9.09%             | 0.1723  | 1.0000           |
| ARID1B      | 2                                        | 6.67%             | 10                                                    | 5.00%             | 0.6595  | 1.0000           | 0                                              | 0.00%             | 0.1611  | 0.5388           | 0                                                           | 0.00%             | 9                                                                  | 4.92%             | 0.6108  | 1.0000           | 0                                              | 0.00%             | 1.0000  | 1.0000           |
| ARID2       | 2                                        | 6.67%             | 13                                                    | 6.50%             | 1.0000  | 1.0000           | 1                                              | 2.27%             | 0.5622  | 0.7871           | 0                                                           | 0.00%             | 5                                                                  | 2.73%             | 1.0000  | 1.0000           | 1                                              | 2.27%             | 1.0000  | 1.0000           |
| ASXL1       | 1                                        | 3.33%             | 13                                                    | 6.50%             | 0.7009  | 1.0000           | 0                                              | 0.00%             | 0.4054  | 0.6561           | 0                                                           | 0.00%             | 3                                                                  | 1.64%             | 1.0000  | 1.0000           | 0                                              | 0.00%             | 1.0000  | 1.0000           |
| ATM         | 5                                        | 16.67%            | 28                                                    | 14.00%            | 0.7794  | 1.0000           | 1                                              | 2.27%             | 0.0371  | 0.5388           | 3                                                           | 10.71%            | 14                                                                 | 7.65%             | 0.4783  | 1.0000           | 1                                              | 2.27%             | 0.2920  | 1.0000           |
| ATR         | 3                                        | 10.00%            | 19                                                    | 9.50%             | 1.0000  | 1.0000           | 1                                              | 2.27%             | 0.2971  | 0.6561           | 1                                                           | 3.57%             | 8                                                                  | 4.37%             | 1.0000  | 1.0000           | 1                                              | 2.27%             | 1.0000  | 1.0000           |
| ATRX        | 3                                        | 10.00%            | 24                                                    | 12.00%            | 1.0000  | 1.0000           | 0                                              | 0.00%             | 0.0626  | 0.5388           | 1                                                           | 3.57%             | 9                                                                  | 4.92%             | 1.0000  | 1.0000           | 0                                              | 0.00%             | 0.3889  | 1.0000           |
| AURKA       | 0                                        | 0.00%             | 2                                                     | 1.00%             | 1.0000  | 1.0000           | 0                                              | 0.00%             | 1.0000  | 1.0000           | 0                                                           | 0.00%             | 0                                                                  | 0.00%             | 1.0000  | 1.0000           | 0                                              | 0.00%             | 1.0000  | 1.0000           |
| BAP1        | 2                                        | 6.67%             | 10                                                    | 5.00%             | 0.6595  | 1.0000           | 0                                              | 0.00%             | 0.1611  | 0.5388           | 0                                                           | 0.00%             | 6                                                                  | 3.28%             | 1.0000  | 1.0000           | 0                                              | 0.00%             | 1.0000  | 1.0000           |
| BCL2L1      | 2                                        | 6.67%             | 3                                                     | 1.50%             | 0.1281  | 1.0000           | 1                                              | 2.27%             | 0.5622  | 0.7871           | 0                                                           | 0.00%             | 0                                                                  | 0.00%             | 1.0000  | 1.0000           | 1                                              | 2.27%             | 1.0000  | 1.0000           |
| BCL2L11     | 2                                        | 6.67%             | 5                                                     | 2.50%             | 0.2280  | 1.0000           | 1                                              | 2.27%             | 0.5622  | 0.7871           | 0                                                           | 0.00%             | 3                                                                  | 1.64%             | 1.0000  | 1.0000           | 1                                              | 2.27%             | 1.0000  | 1.0000           |
| BCL6        | 1                                        | 3.33%             | 12                                                    | 6.00%             | 1.0000  | 1.0000           | 0                                              | 0.00%             | 0.4054  | 0.6561           | 0                                                           | 0.00%             | 4                                                                  | 2.19%             | 1.0000  | 1.0000           | 0                                              | 0.00%             | 1.0000  | 1.0000           |
| BCOR        | 4                                        | 13.33%            | 30                                                    | 15.00%            | 1.0000  | 1.0000           | 0                                              | 0.00%             | 0.0238  | 0.5388           | 2                                                           | 7.14%             | 19                                                                 | 10.38%            | 1.0000  | 1.0000           | 0                                              | 0.00%             | 0.1479  | 1.0000           |
| BIRC2       | 1                                        | 3.33%             | 9                                                     | 4.50%             | 1.0000  | 1.0000           | 0                                              | 0.00%             | 0.4054  | 0.6561           | 0                                                           | 0.00%             | 3                                                                  | 1.64%             | 1.0000  | 1.0000           | 0                                              | 0.00%             | 1.0000  | 1.0000           |
| BRAF        | 1                                        | 3.33%             | 6                                                     | 3.00%             | 1.0000  | 1.0000           | 1                                              | 2.27%             | 1.0000  | 1.0000           | 1                                                           | 3.57%             | 1                                                                  | 0.55%             | 0.2483  | 1.0000           | 1                                              | 2.27%             | 1.0000  | 1.0000           |
| BRCA1       | 2                                        | 6.67%             | 12                                                    | 6.00%             | 1.0000  | 1.0000           | 0                                              | 0.00%             | 0.1611  | 0.5388           | 0                                                           | 0.00%             | 2                                                                  | 1.09%             | 1.0000  | 1.0000           | 0                                              | 0.00%             | 1.0000  | 1.0000           |
| BRCA2       | 2                                        | 6.67%             | 24                                                    | 12.00%            | 0.5437  | 1.0000           | 0                                              | 0.00%             | 0.1611  | 0.5388           | 0                                                           | 0.00%             | 11                                                                 | 6.01%             | 0.3664  | 1.0000           | 0                                              | 0.00%             | 1.0000  | 1.0000           |
| BUB1B       | 1                                        | 3.33%             | 5                                                     | 2.50%             | 0.5720  | 1.0000           | 1                                              | 2.27%             | 1.0000  | 1.0000           | 0                                                           | 0.00%             | 1                                                                  | 0.55%             | 1.0000  | 1.0000           | 1                                              | 2.27%             | 1.0000  | 1.0000           |
| CARD11      | 1                                        | 3.33%             | 16                                                    | 8.00%             | 0.7058  | 1.0000           | 0                                              | 0.00%             | 0.4054  | 0.6561           | 0                                                           | 0.00%             | 9                                                                  | 4.92%             | 0.6108  | 1.0000           | 0                                              | 0.00%             | 1.0000  | 1.0000           |
| CBL         | 2                                        | 6.67%             | 10                                                    | 5.00%             | 0.6595  | 1.0000           | 1                                              | 2.27%             | 0.5622  | 0.7871           | 0                                                           | 0.00%             | 6                                                                  | 3.28%             | 1.0000  | 1.0000           | 1                                              | 2.27%             | 1.0000  | 1.0000           |
| CBLB        | 1                                        | 3.33%             | 11                                                    | 5.50%             | 1.0000  | 1.0000           | 0                                              | 0.00%             | 0.4054  | 0.6561           | 0                                                           | 0.00%             | 2                                                                  | 1.09%             | 1.0000  | 1.0000           | 0                                              | 0.00%             | 1.0000  | 1.0000           |
| CBLC        | 1                                        | 3.33%             | 5                                                     | 2.50%             | 0.5720  | 1.0000           | 0                                              | 0.00%             | 0.4054  | 0.6561           | 0                                                           | 0.00%             | 2                                                                  | 1.09%             | 1.0000  | 1.0000           | 0                                              | 0.00%             | 1.0000  | 1.0000           |
| CCND1       | 1                                        | 3.33%             | 15                                                    | 7.50%             | 0.7014  | 1.0000           | 0                                              | 0.00%             | 0.4054  | 0.6561           | 0                                                           | 0.00%             | 12                                                                 | 6.56%             | 0.3743  | 1.0000           | 0                                              | 0.00%             | 1.0000  | 1.0000           |
| CCND2       | 1                                        | 3.33%             | 6                                                     | 3.00%             | 1.0000  | 1.0000           | 0                                              | 0.00%             | 0.4054  | 0.6561           | 0                                                           | 0.00%             | 2                                                                  | 1.09%             | 1.0000  | 1.0000           | 0                                              | 0.00%             | 1.0000  | 1.0000           |
| CCND3       | 2                                        | 6.67%             | 4                                                     | 2.00%             | 0.1768  | 1.0000           | 0                                              | 0.00%             | 0.1611  | 0.5388           | 0                                                           | 0.00%             | 2                                                                  | 1.09%             | 1.0000  | 1.0000           | 0                                              | 0.00%             | 1.0000  | 1.0000           |
| CCNE1       | 0                                        | 0.00%             | 5                                                     | 2.50%             | 1.0000  | 1.0000           | 0                                              | 0.00%             | 1.0000  | 1.0000           | 0                                                           | 0.00%             | 1                                                                  | 0.55%             | 1.0000  | 1.0000           | 0                                              | 0.00%             | 1.0000  | 1.0000           |
| CD79B       | 0                                        | 0.00%             | 2                                                     | 1.00%             | 1.0000  | 1.0000           | 0                                              | 0.00%             | 1.0000  | 1.0000           | 0                                                           | 0.00%             | 0                                                                  | 0.00%             | 1.0000  | 1.0000           | 0                                              | 0.00%             | 1.0000  | 1.0000           |
| CDC42EP2    | 0                                        | 0.00%             | 0                                                     | 0.00%             | 1.0000  | 1.0000           | 0                                              | 0.00%             | 1.0000  | 1.0000           | 0                                                           | 0.00%             | 0                                                                  | 0.00%             | 1.0000  | 1.0000           | 0                                              | 0.00%             | 1.0000  | 1.0000           |
| CDC73       | 1                                        | 3.33%             | 14                                                    | 7.00%             | 0.6996  | 1.0000           | 0                                              | 0.00%             | 0.4054  | 0.6561           | 0                                                           | 0.00%             | 5                                                                  | 2.73%             | 1.0000  | 1.0000           | 0                                              | 0.00%             | 1.0000  | 1.0000           |
| CDH1        | 1                                        | 3.33%             | 13                                                    | 6.50%             | 0.7009  | 1.0000           | 0                                              | 0.00%             | 0.4054  | 0.6561           | 0                                                           | 0.00%             | 7                                                                  | 3.83%             | 0.5976  | 1.0000           | 0                                              | 0.00%             | 1.0000  | 1.0000           |
| CDH11       | 1                                        | 3.33%             | 12                                                    | 6.00%             | 1.0000  | 1.0000           | 0                                              | 0.00%             | 0.4054  | 0.6561           | 0                                                           | 0.00%             | 5                                                                  | 2.73%             | 1.0000  | 1.0000           | 0                                              | 0.00%             | 1.0000  | 1.0000           |
| CDK12       | 2                                        | 6.67%             | 10                                                    | 5.00%             | 0.6595  | 1.0000           | 2                                              | 4.55%             | 1.0000  | 1.0000           | 0                                                           | 0.00%             | 4                                                                  | 2.19%             | 1.0000  | 1.0000           | 2                                              | 4.55%             | 0.5180  | 1.0000           |
| CDK4        | 0                                        | 0.00%             | 3                                                     | 1.50%             | 1.0000  | 1.0000           | 0                                              | 0.00%             | 1.0000  | 1.0000           | 0                                                           | 0.00%             | 1                                                                  | 0.55%             | 1.0000  | 1.0000           | 0                                              | 0.00%             | 1.0000  | 1.0000           |

|          |   |        |    |        |        |        |   |       |        |        |   |       |    |        |        |        |   |       |        |        |
|----------|---|--------|----|--------|--------|--------|---|-------|--------|--------|---|-------|----|--------|--------|--------|---|-------|--------|--------|
| CDK6     | 0 | 0.00%  | 3  | 1.50%  | 1.0000 | 1.0000 | 0 | 0.00% | 1.0000 | 1.0000 | 0 | 0.00% | 1  | 0.55%  | 1.0000 | 1.0000 | 0 | 0.00% | 1.0000 | 1.0000 |
| CDK8     | 2 | 6.67%  | 4  | 2.00%  | 0.1768 | 1.0000 | 0 | 0.00% | 0.1611 | 0.5388 | 0 | 0.00% | 2  | 1.09%  | 1.0000 | 1.0000 | 0 | 0.00% | 1.0000 | 1.0000 |
| CDKN1A   | 1 | 3.33%  | 1  | 0.50%  | 0.2444 | 1.0000 | 0 | 0.00% | 0.4054 | 0.6561 | 0 | 0.00% | 0  | 0.00%  | 1.0000 | 1.0000 | 0 | 0.00% | 1.0000 | 1.0000 |
| CDKN2A   | 0 | 0.00%  | 2  | 1.00%  | 1.0000 | 1.0000 | 0 | 0.00% | 1.0000 | 1.0000 | 0 | 0.00% | 1  | 0.55%  | 1.0000 | 1.0000 | 0 | 0.00% | 1.0000 | 1.0000 |
| CDKN2B   | 1 | 3.33%  | 0  | 0.00%  | 0.1304 | 1.0000 | 0 | 0.00% | 0.4054 | 0.6561 | 0 | 0.00% | 0  | 0.00%  | 1.0000 | 1.0000 | 0 | 0.00% | 1.0000 | 1.0000 |
| CDKN2C   | 0 | 0.00%  | 3  | 1.50%  | 1.0000 | 1.0000 | 0 | 0.00% | 1.0000 | 1.0000 | 0 | 0.00% | 0  | 0.00%  | 1.0000 | 1.0000 | 0 | 0.00% | 1.0000 | 1.0000 |
| CEBPA    | 1 | 3.33%  | 0  | 0.00%  | 0.1304 | 1.0000 | 0 | 0.00% | 0.4054 | 0.6561 | 0 | 0.00% | 0  | 0.00%  | 1.0000 | 1.0000 | 0 | 0.00% | 1.0000 | 1.0000 |
| CHEK1    | 1 | 3.33%  | 2  | 1.00%  | 0.3438 | 1.0000 | 0 | 0.00% | 0.4054 | 0.6561 | 0 | 0.00% | 1  | 0.55%  | 1.0000 | 1.0000 | 0 | 0.00% | 1.0000 | 1.0000 |
| CHEK2    | 1 | 3.33%  | 12 | 6.00%  | 1.0000 | 1.0000 | 1 | 2.27% | 1.0000 | 1.0000 | 0 | 0.00% | 3  | 1.64%  | 1.0000 | 1.0000 | 1 | 2.27% | 1.0000 | 1.0000 |
| CIC      | 1 | 3.33%  | 16 | 8.00%  | 0.7058 | 1.0000 | 1 | 2.27% | 1.0000 | 1.0000 | 0 | 0.00% | 10 | 5.46%  | 0.3652 | 1.0000 | 1 | 2.27% | 1.0000 | 1.0000 |
| CREBBP   | 3 | 10.00% | 21 | 10.50% | 1.0000 | 1.0000 | 1 | 2.27% | 0.2971 | 0.6561 | 1 | 3.57% | 11 | 6.01%  | 1.0000 | 1.0000 | 1 | 2.27% | 1.0000 | 1.0000 |
| CRKL     | 0 | 0.00%  | 6  | 3.00%  | 1.0000 | 1.0000 | 0 | 0.00% | 1.0000 | 1.0000 | 0 | 0.00% | 3  | 1.64%  | 1.0000 | 1.0000 | 0 | 0.00% | 1.0000 | 1.0000 |
| CRLF2    | 3 | 10.00% | 4  | 2.00%  | 0.0490 | 0.8796 | 1 | 2.27% | 0.2971 | 0.6561 | 1 | 3.57% | 1  | 0.55%  | 0.2483 | 1.0000 | 1 | 2.27% | 1.0000 | 1.0000 |
| CSF1R    | 1 | 3.33%  | 5  | 2.50%  | 0.5720 | 1.0000 | 0 | 0.00% | 0.4054 | 0.6561 | 1 | 3.57% | 2  | 1.09%  | 0.3490 | 1.0000 | 0 | 0.00% | 0.3889 | 1.0000 |
| CTCF     | 2 | 6.67%  | 45 | 22.50% | 0.0514 | 0.8796 | 0 | 0.00% | 0.1611 | 0.5388 | 0 | 0.00% | 38 | 20.77% | 0.0033 | 0.1656 | 0 | 0.00% | 1.0000 | 1.0000 |
| CTNNB1   | 2 | 6.67%  | 74 | 37.00% | 0.0006 | 0.0452 | 0 | 0.00% | 0.1611 | 0.5388 | 0 | 0.00% | 67 | 36.61% | 0.0000 | 0.0000 | 0 | 0.00% | 1.0000 | 1.0000 |
| CYLD     | 1 | 3.33%  | 12 | 6.00%  | 1.0000 | 1.0000 | 1 | 2.27% | 1.0000 | 1.0000 | 0 | 0.00% | 2  | 1.09%  | 1.0000 | 1.0000 | 1 | 2.27% | 1.0000 | 1.0000 |
| DAXX     | 3 | 10.00% | 7  | 3.50%  | 0.1275 | 1.0000 | 1 | 2.27% | 0.2971 | 0.6561 | 1 | 3.57% | 1  | 0.55%  | 0.2483 | 1.0000 | 1 | 2.27% | 1.0000 | 1.0000 |
| DDR2     | 2 | 6.67%  | 12 | 6.00%  | 1.0000 | 1.0000 | 1 | 2.27% | 0.5622 | 0.7871 | 0 | 0.00% | 3  | 1.64%  | 1.0000 | 1.0000 | 1 | 2.27% | 1.0000 | 1.0000 |
| DICER1   | 4 | 13.33% | 21 | 10.50% | 0.7517 | 1.0000 | 2 | 4.55% | 0.2151 | 0.6561 | 2 | 7.14% | 8  | 4.37%  | 0.6253 | 1.0000 | 2 | 4.55% | 0.6395 | 1.0000 |
| DIS3     | 1 | 3.33%  | 9  | 4.50%  | 1.0000 | 1.0000 | 0 | 0.00% | 0.4054 | 0.6561 | 0 | 0.00% | 2  | 1.09%  | 1.0000 | 1.0000 | 0 | 0.00% | 1.0000 | 1.0000 |
| DNMT1    | 2 | 6.67%  | 9  | 4.50%  | 0.6403 | 1.0000 | 0 | 0.00% | 0.1611 | 0.5388 | 0 | 0.00% | 3  | 1.64%  | 1.0000 | 1.0000 | 0 | 0.00% | 1.0000 | 1.0000 |
| DNMT3A   | 1 | 3.33%  | 8  | 4.00%  | 1.0000 | 1.0000 | 0 | 0.00% | 0.4054 | 0.6561 | 0 | 0.00% | 4  | 2.19%  | 1.0000 | 1.0000 | 0 | 0.00% | 1.0000 | 1.0000 |
| DNMT3B   | 2 | 6.67%  | 13 | 6.50%  | 1.0000 | 1.0000 | 0 | 0.00% | 0.1611 | 0.5388 | 0 | 0.00% | 4  | 2.19%  | 1.0000 | 1.0000 | 0 | 0.00% | 1.0000 | 1.0000 |
| E2F3     | 1 | 3.33%  | 4  | 2.00%  | 0.5061 | 1.0000 | 0 | 0.00% | 0.4054 | 0.6561 | 0 | 0.00% | 1  | 0.55%  | 1.0000 | 1.0000 | 0 | 0.00% | 1.0000 | 1.0000 |
| EGFR     | 1 | 3.33%  | 8  | 4.00%  | 1.0000 | 1.0000 | 0 | 0.00% | 0.4054 | 0.6561 | 0 | 0.00% | 3  | 1.64%  | 1.0000 | 1.0000 | 0 | 0.00% | 1.0000 | 1.0000 |
| EIF4EBP1 | 0 | 0.00%  | 0  | 0.00%  | 1.0000 | 1.0000 | 0 | 0.00% | 1.0000 | 1.0000 | 0 | 0.00% | 0  | 0.00%  | 1.0000 | 1.0000 | 0 | 0.00% | 1.0000 | 1.0000 |
| EP300    | 1 | 3.33%  | 21 | 10.50% | 0.3238 | 1.0000 | 0 | 0.00% | 0.4054 | 0.6561 | 0 | 0.00% | 13 | 7.10%  | 0.2242 | 1.0000 | 0 | 0.00% | 1.0000 | 1.0000 |
| EPHA10   | 1 | 3.33%  | 13 | 6.50%  | 0.7009 | 1.0000 | 1 | 2.27% | 1.0000 | 1.0000 | 0 | 0.00% | 8  | 4.37%  | 0.6009 | 1.0000 | 1 | 2.27% | 1.0000 | 1.0000 |
| EPHA2    | 1 | 3.33%  | 5  | 2.50%  | 0.5720 | 1.0000 | 0 | 0.00% | 0.4054 | 0.6561 | 0 | 0.00% | 2  | 1.09%  | 1.0000 | 1.0000 | 0 | 0.00% | 1.0000 | 1.0000 |
| EPHA3    | 3 | 10.00% | 13 | 6.50%  | 0.4460 | 1.0000 | 0 | 0.00% | 0.0626 | 0.5388 | 1 | 3.57% | 4  | 2.19%  | 0.5129 | 1.0000 | 0 | 0.00% | 0.3889 | 1.0000 |
| EPHA4    | 2 | 6.67%  | 13 | 6.50%  | 1.0000 | 1.0000 | 0 | 0.00% | 0.1611 | 0.5388 | 1 | 3.57% | 6  | 3.28%  | 1.0000 | 1.0000 | 0 | 0.00% | 0.3889 | 1.0000 |
| EPHA5    | 4 | 13.33% | 18 | 9.00%  | 0.5020 | 1.0000 | 2 | 4.55% | 0.2151 | 0.6561 | 2 | 7.14% | 11 | 6.01%  | 0.6848 | 1.0000 | 2 | 4.55% | 0.6395 | 1.0000 |
| EPHA6    | 2 | 6.67%  | 11 | 5.50%  | 0.6802 | 1.0000 | 0 | 0.00% | 0.1611 | 0.5388 | 0 | 0.00% | 2  | 1.09%  | 1.0000 | 1.0000 | 0 | 0.00% | 1.0000 | 1.0000 |
| EPHA7    | 2 | 6.67%  | 6  | 3.00%  | 0.2802 | 1.0000 | 1 | 2.27% | 0.5622 | 0.7871 | 0 | 0.00% | 0  | 0.00%  | 1.0000 | 1.0000 | 1 | 2.27% | 1.0000 | 1.0000 |
| EPHA8    | 1 | 3.33%  | 11 | 5.50%  | 1.0000 | 1.0000 | 0 | 0.00% | 0.4054 | 0.6561 | 0 | 0.00% | 3  | 1.64%  | 1.0000 | 1.0000 | 0 | 0.00% | 1.0000 | 1.0000 |
| EPHB1    | 2 | 6.67%  | 17 | 8.50%  | 1.0000 | 1.0000 | 0 | 0.00% | 0.1611 | 0.5388 | 0 | 0.00% | 4  | 2.19%  | 1.0000 | 1.0000 | 0 | 0.00% | 1.0000 | 1.0000 |
| EPHB2    | 2 | 6.67%  | 11 | 5.50%  | 0.6802 | 1.0000 | 0 | 0.00% | 0.1611 | 0.5388 | 0 | 0.00% | 5  | 2.73%  | 1.0000 | 1.0000 | 0 | 0.00% | 1.0000 | 1.0000 |
| EPHB3    | 2 | 6.67%  | 6  | 3.00%  | 0.2802 | 1.0000 | 0 | 0.00% | 0.1611 | 0.5388 | 1 | 3.57% | 2  | 1.09%  | 0.3490 | 1.0000 | 0 | 0.00% | 0.3889 | 1.0000 |
| EPHB4    | 1 | 3.33%  | 4  | 2.00%  | 0.5061 | 1.0000 | 0 | 0.00% | 0.4054 | 0.6561 | 0 | 0.00% | 2  | 1.09%  | 1.0000 | 1.0000 | 0 | 0.00% | 1.0000 | 1.0000 |
| EPHB6    | 1 | 3.33%  | 10 | 5.00%  | 1.0000 | 1.0000 | 0 | 0.00% | 0.4054 | 0.6561 | 0 | 0.00% | 4  | 2.19%  | 1.0000 | 1.0000 | 0 | 0.00% | 1.0000 | 1.0000 |
| ERBB2    | 3 | 10.00% | 8  | 4.00%  | 0.1601 | 1.0000 | 0 | 0.00% | 0.0626 | 0.5388 | 2 | 7.14% | 6  | 3.28%  | 0.2874 | 1.0000 | 0 | 0.00% | 0.1479 | 1.0000 |
| ERBB3    | 3 | 10.00% | 16 | 8.00%  | 0.7212 | 1.0000 | 1 | 2.27% | 0.2971 | 0.6561 | 2 | 7.14% | 10 | 5.46%  | 0.6633 | 1.0000 | 1 | 2.27% | 0.5559 | 1.0000 |
| ERBB4    | 3 | 10.00% | 14 | 7.00%  | 0.4713 | 1.0000 | 1 | 2.27% | 0.2971 | 0.6561 | 1 | 3.57% | 4  | 2.19%  | 0.5129 | 1.0000 | 1 | 2.27% | 1.0000 | 1.0000 |
| ERCC2    | 1 | 3.33%  | 0  | 0.00%  | 0.1304 | 1.0000 | 1 | 2.27% | 1.0000 | 1.0000 | 0 | 0.00% | 0  | 0.00%  | 1.0000 | 1.0000 | 1 | 2.27% | 1.0000 | 1.0000 |
| ERCC5    | 2 | 6.67%  | 11 | 5.50%  | 0.6802 | 1.0000 | 0 | 0.00% | 0.1611 | 0.5388 | 0 | 0.00% | 2  | 1.09%  | 1.0000 | 1.0000 | 0 | 0.00% | 1.0000 | 1.0000 |
| ERG      | 1 | 3.33%  | 7  | 3.50%  | 1.0000 | 1.0000 | 0 | 0.00% | 0.4054 | 0.6561 | 0 | 0.00% | 3  | 1.64%  | 1.0000 | 1.0000 | 0 | 0.00% | 1.0000 | 1.0000 |
| ESR1     | 0 | 0.00%  | 11 | 5.50%  | 0.3672 | 1.0000 | 0 | 0.00% | 1.0000 | 1.0000 | 0 | 0.00% | 7  | 3.83%  | 0.5976 | 1.0000 | 0 | 0.00% | 1.0000 | 1.0000 |
| ETV1     | 2 | 6.67%  | 8  | 4.00%  | 0.6233 | 1.0000 | 0 | 0.00% | 0.1611 | 0.5388 | 0 | 0.00% | 2  | 1.09%  | 1.0000 | 1.0000 | 0 | 0.00% | 1.0000 | 1.0000 |
| ETV6     | 3 | 10.00% | 5  | 2.50%  | 0.0714 | 1.0000 | 0 | 0.00% | 0.0626 | 0.5388 | 1 | 3.57% | 1  | 0.55%  | 0.2483 | 1.0000 | 0 | 0.00% | 0.3889 | 1.0000 |
| EZH2     | 1 | 3.33%  | 12 | 6.00%  | 1.0000 | 1.0000 | 0 | 0.00% | 0.4054 | 0.6561 | 0 | 0.00% | 2  | 1.09%  | 1.0000 | 1.0000 | 0 | 0.00% | 1.0000 | 1.0000 |
| AMER1    | 0 | 0.00%  | 17 | 8.50%  | 0.1380 | 1.0000 | 1 | 2.27% | 1.0000 | 1.0000 | 0 | 0.00% | 6  | 3.28%  | 1.0000 | 1.0000 | 1 | 2.27% | 1.0000 | 1.0000 |

|          |   |        |    |        |        |        |    |        |        |        |   |        |    |        |        |        |    |        |        |        |
|----------|---|--------|----|--------|--------|--------|----|--------|--------|--------|---|--------|----|--------|--------|--------|----|--------|--------|--------|
| FAM46C   | 1 | 3.33%  | 5  | 2.50%  | 0.5720 | 1.0000 | 0  | 0.00%  | 0.4054 | 0.6561 | 0 | 0.00%  | 4  | 2.19%  | 1.0000 | 1.0000 | 0  | 0.00%  | 1.0000 | 1.0000 |
| FAS      | 1 | 3.33%  | 8  | 4.00%  | 1.0000 | 1.0000 | 0  | 0.00%  | 0.4054 | 0.6561 | 0 | 0.00%  | 1  | 0.55%  | 1.0000 | 1.0000 | 0  | 0.00%  | 1.0000 | 1.0000 |
| FAT1     | 3 | 10.00% | 38 | 19.00% | 0.3098 | 1.0000 | 2  | 4.55%  | 0.3895 | 0.6561 | 1 | 3.57%  | 25 | 13.66% | 0.2137 | 1.0000 | 2  | 4.55%  | 1.0000 | 1.0000 |
| FAT4     | 4 | 13.33% | 37 | 18.50% | 0.6146 | 1.0000 | 3  | 6.82%  | 0.4312 | 0.6941 | 2 | 7.14%  | 20 | 10.93% | 0.7455 | 1.0000 | 3  | 6.82%  | 1.0000 | 1.0000 |
| FBXO11   | 2 | 6.67%  | 7  | 3.50%  | 0.3323 | 1.0000 | 0  | 0.00%  | 0.1611 | 0.5388 | 0 | 0.00%  | 2  | 1.09%  | 1.0000 | 1.0000 | 0  | 0.00%  | 1.0000 | 1.0000 |
| FBXW7    | 8 | 26.67% | 24 | 12.00% | 0.0445 | 0.8796 | 14 | 31.82% | 0.7964 | 1.0000 | 7 | 25.00% | 10 | 5.46%  | 0.0027 | 0.1625 | 14 | 31.82% | 0.6026 | 1.0000 |
| FGFR1    | 1 | 3.33%  | 9  | 4.50%  | 1.0000 | 1.0000 | 0  | 0.00%  | 0.4054 | 0.6561 | 0 | 0.00%  | 3  | 1.64%  | 1.0000 | 1.0000 | 0  | 0.00%  | 1.0000 | 1.0000 |
| FGFR2    | 3 | 10.00% | 27 | 13.50% | 0.7751 | 1.0000 | 4  | 9.09%  | 1.0000 | 1.0000 | 1 | 3.57%  | 22 | 12.02% | 0.3251 | 1.0000 | 4  | 9.09%  | 0.6422 | 1.0000 |
| FGFR3    | 2 | 6.67%  | 4  | 2.00%  | 0.1768 | 1.0000 | 1  | 2.27%  | 0.5622 | 0.7871 | 1 | 3.57%  | 0  | 0.00%  | 0.1327 | 1.0000 | 1  | 2.27%  | 1.0000 | 1.0000 |
| FGFR4    | 2 | 6.67%  | 11 | 5.50%  | 0.6802 | 1.0000 | 1  | 2.27%  | 0.5622 | 0.7871 | 1 | 3.57%  | 7  | 3.83%  | 1.0000 | 1.0000 | 1  | 2.27%  | 1.0000 | 1.0000 |
| FH       | 0 | 0.00%  | 7  | 3.50%  | 0.5987 | 1.0000 | 0  | 0.00%  | 1.0000 | 1.0000 | 0 | 0.00%  | 2  | 1.09%  | 1.0000 | 1.0000 | 0  | 0.00%  | 1.0000 | 1.0000 |
| FKBP1A   | 0 | 0.00%  | 1  | 0.50%  | 1.0000 | 1.0000 | 0  | 0.00%  | 1.0000 | 1.0000 | 0 | 0.00%  | 0  | 0.00%  | 1.0000 | 1.0000 | 0  | 0.00%  | 1.0000 | 1.0000 |
| FLCN     | 1 | 3.33%  | 7  | 3.50%  | 1.0000 | 1.0000 | 0  | 0.00%  | 0.4054 | 0.6561 | 0 | 0.00%  | 3  | 1.64%  | 1.0000 | 1.0000 | 0  | 0.00%  | 1.0000 | 1.0000 |
| FLT1     | 2 | 6.67%  | 13 | 6.50%  | 1.0000 | 1.0000 | 0  | 0.00%  | 0.1611 | 0.5388 | 0 | 0.00%  | 2  | 1.09%  | 1.0000 | 1.0000 | 0  | 0.00%  | 1.0000 | 1.0000 |
| FLT3     | 2 | 6.67%  | 9  | 4.50%  | 0.6403 | 1.0000 | 0  | 0.00%  | 0.1611 | 0.5388 | 0 | 0.00%  | 2  | 1.09%  | 1.0000 | 1.0000 | 0  | 0.00%  | 1.0000 | 1.0000 |
| FLT4     | 2 | 6.67%  | 7  | 3.50%  | 0.3323 | 1.0000 | 1  | 2.27%  | 0.5622 | 0.7871 | 0 | 0.00%  | 2  | 1.09%  | 1.0000 | 1.0000 | 1  | 2.27%  | 1.0000 | 1.0000 |
| FOXL2    | 0 | 0.00%  | 0  | 0.00%  | 1.0000 | 1.0000 | 0  | 0.00%  | 1.0000 | 1.0000 | 0 | 0.00%  | 0  | 0.00%  | 1.0000 | 1.0000 | 0  | 0.00%  | 1.0000 | 1.0000 |
| FUBP1    | 1 | 3.33%  | 7  | 3.50%  | 1.0000 | 1.0000 | 0  | 0.00%  | 0.4054 | 0.6561 | 0 | 0.00%  | 1  | 0.55%  | 1.0000 | 1.0000 | 0  | 0.00%  | 1.0000 | 1.0000 |
| GATA1    | 1 | 3.33%  | 7  | 3.50%  | 1.0000 | 1.0000 | 1  | 2.27%  | 1.0000 | 1.0000 | 0 | 0.00%  | 3  | 1.64%  | 1.0000 | 1.0000 | 1  | 2.27%  | 1.0000 | 1.0000 |
| GATA2    | 0 | 0.00%  | 2  | 1.00%  | 1.0000 | 1.0000 | 0  | 0.00%  | 1.0000 | 1.0000 | 0 | 0.00%  | 1  | 0.55%  | 1.0000 | 1.0000 | 0  | 0.00%  | 1.0000 | 1.0000 |
| GATA3    | 2 | 6.67%  | 2  | 1.00%  | 0.0836 | 1.0000 | 1  | 2.27%  | 0.5622 | 0.7871 | 0 | 0.00%  | 0  | 0.00%  | 1.0000 | 1.0000 | 1  | 2.27%  | 1.0000 | 1.0000 |
| GLI1     | 2 | 6.67%  | 10 | 5.00%  | 0.6595 | 1.0000 | 0  | 0.00%  | 0.1611 | 0.5388 | 0 | 0.00%  | 3  | 1.64%  | 1.0000 | 1.0000 | 0  | 0.00%  | 1.0000 | 1.0000 |
| GLI3     | 3 | 10.00% | 19 | 9.50%  | 1.0000 | 1.0000 | 1  | 2.27%  | 0.2971 | 0.6561 | 1 | 3.57%  | 9  | 4.92%  | 1.0000 | 1.0000 | 1  | 2.27%  | 1.0000 | 1.0000 |
| GNA11    | 1 | 3.33%  | 2  | 1.00%  | 0.3438 | 1.0000 | 0  | 0.00%  | 0.4054 | 0.6561 | 0 | 0.00%  | 1  | 0.55%  | 1.0000 | 1.0000 | 0  | 0.00%  | 1.0000 | 1.0000 |
| GNAQ     | 1 | 3.33%  | 3  | 1.50%  | 0.4305 | 1.0000 | 0  | 0.00%  | 0.4054 | 0.6561 | 0 | 0.00%  | 1  | 0.55%  | 1.0000 | 1.0000 | 0  | 0.00%  | 1.0000 | 1.0000 |
| GNAS     | 2 | 6.67%  | 17 | 8.50%  | 1.0000 | 1.0000 | 0  | 0.00%  | 0.1611 | 0.5388 | 0 | 0.00%  | 10 | 5.46%  | 0.3652 | 1.0000 | 0  | 0.00%  | 1.0000 | 1.0000 |
| GOLPH3   | 1 | 3.33%  | 4  | 2.00%  | 0.5061 | 1.0000 | 0  | 0.00%  | 0.4054 | 0.6561 | 0 | 0.00%  | 0  | 0.00%  | 1.0000 | 1.0000 | 0  | 0.00%  | 1.0000 | 1.0000 |
| GRIN2A   | 2 | 6.67%  | 19 | 9.50%  | 1.0000 | 1.0000 | 0  | 0.00%  | 0.1611 | 0.5388 | 0 | 0.00%  | 6  | 3.28%  | 1.0000 | 1.0000 | 0  | 0.00%  | 1.0000 | 1.0000 |
| GRM3     | 1 | 3.33%  | 12 | 6.00%  | 1.0000 | 1.0000 | 1  | 2.27%  | 1.0000 | 1.0000 | 0 | 0.00%  | 4  | 2.19%  | 1.0000 | 1.0000 | 1  | 2.27%  | 1.0000 | 1.0000 |
| GSK3B    | 1 | 3.33%  | 9  | 4.50%  | 1.0000 | 1.0000 | 0  | 0.00%  | 0.4054 | 0.6561 | 0 | 0.00%  | 2  | 1.09%  | 1.0000 | 1.0000 | 0  | 0.00%  | 1.0000 | 1.0000 |
| HDAC2    | 1 | 3.33%  | 5  | 2.50%  | 0.5720 | 1.0000 | 0  | 0.00%  | 0.4054 | 0.6561 | 0 | 0.00%  | 3  | 1.64%  | 1.0000 | 1.0000 | 0  | 0.00%  | 1.0000 | 1.0000 |
| HIF1A    | 1 | 3.33%  | 9  | 4.50%  | 1.0000 | 1.0000 | 0  | 0.00%  | 0.4054 | 0.6561 | 0 | 0.00%  | 2  | 1.09%  | 1.0000 | 1.0000 | 0  | 0.00%  | 1.0000 | 1.0000 |
| HLA-A    | 3 | 10.00% | 1  | 0.50%  | 0.0074 | 0.4455 | 0  | 0.00%  | 0.0626 | 0.5388 | 3 | 10.71% | 1  | 0.55%  | 0.0077 | 0.3311 | 0  | 0.00%  | 0.0549 | 1.0000 |
| HMGA2    | 0 | 0.00%  | 0  | 0.00%  | 1.0000 | 1.0000 | 0  | 0.00%  | 1.0000 | 1.0000 | 0 | 0.00%  | 0  | 0.00%  | 1.0000 | 1.0000 | 0  | 0.00%  | 1.0000 | 1.0000 |
| HNF1A    | 4 | 13.33% | 6  | 3.00%  | 0.0284 | 0.8548 | 1  | 2.27%  | 0.1511 | 0.5388 | 3 | 10.71% | 4  | 2.19%  | 0.0510 | 1.0000 | 1  | 2.27%  | 0.2920 | 1.0000 |
| HRAS     | 2 | 6.67%  | 1  | 0.50%  | 0.0455 | 0.8796 | 0  | 0.00%  | 0.1611 | 0.5388 | 1 | 3.57%  | 1  | 0.55%  | 0.2483 | 1.0000 | 0  | 0.00%  | 0.3889 | 1.0000 |
| HSP90AA1 | 1 | 3.33%  | 6  | 3.00%  | 1.0000 | 1.0000 | 0  | 0.00%  | 0.4054 | 0.6561 | 0 | 0.00%  | 3  | 1.64%  | 1.0000 | 1.0000 | 0  | 0.00%  | 1.0000 | 1.0000 |
| IDH1     | 1 | 3.33%  | 3  | 1.50%  | 0.4305 | 1.0000 | 1  | 2.27%  | 1.0000 | 1.0000 | 1 | 3.57%  | 1  | 0.55%  | 0.2483 | 1.0000 | 1  | 2.27%  | 1.0000 | 1.0000 |
| IDH2     | 2 | 6.67%  | 4  | 2.00%  | 0.1768 | 1.0000 | 0  | 0.00%  | 0.1611 | 0.5388 | 0 | 0.00%  | 1  | 0.55%  | 1.0000 | 1.0000 | 0  | 0.00%  | 1.0000 | 1.0000 |
| IGF1R    | 1 | 3.33%  | 11 | 5.50%  | 1.0000 | 1.0000 | 0  | 0.00%  | 0.4054 | 0.6561 | 0 | 0.00%  | 4  | 2.19%  | 1.0000 | 1.0000 | 0  | 0.00%  | 1.0000 | 1.0000 |
| IGFBP7   | 1 | 3.33%  | 6  | 3.00%  | 1.0000 | 1.0000 | 0  | 0.00%  | 0.4054 | 0.6561 | 0 | 0.00%  | 4  | 2.19%  | 1.0000 | 1.0000 | 0  | 0.00%  | 1.0000 | 1.0000 |
| IKBKE    | 2 | 6.67%  | 4  | 2.00%  | 0.1768 | 1.0000 | 0  | 0.00%  | 0.1611 | 0.5388 | 0 | 0.00%  | 1  | 0.55%  | 1.0000 | 1.0000 | 0  | 0.00%  | 1.0000 | 1.0000 |
| IKZF1    | 2 | 6.67%  | 9  | 4.50%  | 0.6403 | 1.0000 | 0  | 0.00%  | 0.1611 | 0.5388 | 0 | 0.00%  | 4  | 2.19%  | 1.0000 | 1.0000 | 0  | 0.00%  | 1.0000 | 1.0000 |
| IL7R     | 0 | 0.00%  | 6  | 3.00%  | 1.0000 | 1.0000 | 1  | 2.27%  | 1.0000 | 1.0000 | 0 | 0.00%  | 2  | 1.09%  | 1.0000 | 1.0000 | 1  | 2.27%  | 1.0000 | 1.0000 |
| INPP4A   | 3 | 10.00% | 16 | 8.00%  | 0.7212 | 1.0000 | 0  | 0.00%  | 0.0626 | 0.5388 | 1 | 3.57%  | 9  | 4.92%  | 1.0000 | 1.0000 | 0  | 0.00%  | 0.3889 | 1.0000 |
| INPP4B   | 1 | 3.33%  | 12 | 6.00%  | 1.0000 | 1.0000 | 0  | 0.00%  | 0.4054 | 0.6561 | 0 | 0.00%  | 4  | 2.19%  | 1.0000 | 1.0000 | 0  | 0.00%  | 1.0000 | 1.0000 |
| INSR     | 2 | 6.67%  | 14 | 7.00%  | 1.0000 | 1.0000 | 1  | 2.27%  | 0.5622 | 0.7871 | 0 | 0.00%  | 8  | 4.37%  | 0.6009 | 1.0000 | 1  | 2.27%  | 1.0000 | 1.0000 |
| IRF4     | 2 | 6.67%  | 7  | 3.50%  | 0.3323 | 1.0000 | 0  | 0.00%  | 0.1611 | 0.5388 | 0 | 0.00%  | 1  | 0.55%  | 1.0000 | 1.0000 | 0  | 0.00%  | 1.0000 | 1.0000 |
| IRS1     | 3 | 10.00% | 11 | 5.50%  | 0.4025 | 1.0000 | 0  | 0.00%  | 0.0626 | 0.5388 | 1 | 3.57%  | 4  | 2.19%  | 0.5129 | 1.0000 | 0  | 0.00%  | 0.3889 | 1.0000 |
| IRS2     | 2 | 6.67%  | 0  | 0.00%  | 0.0165 | 0.6885 | 0  | 0.00%  | 0.1611 | 0.5388 | 0 | 0.00%  | 0  | 0.00%  | 1.0000 | 1.0000 | 0  | 0.00%  | 1.0000 | 1.0000 |
| JAK1     | 1 | 3.33%  | 14 | 7.00%  | 0.6996 | 1.0000 | 0  | 0.00%  | 0.4054 | 0.6561 | 0 | 0.00%  | 8  | 4.37%  | 0.6009 | 1.0000 | 0  | 0.00%  | 1.0000 | 1.0000 |
| JAK2     | 2 | 6.67%  | 13 | 6.50%  | 1.0000 | 1.0000 | 0  | 0.00%  | 0.1611 | 0.5388 | 2 | 7.14%  | 3  | 1.64%  | 0.1319 | 1.0000 | 0  | 0.00%  | 0.1479 | 1.0000 |

|        |   |        |    |        |        |        |   |       |        |        |   |        |    |        |        |        |   |       |        |        |
|--------|---|--------|----|--------|--------|--------|---|-------|--------|--------|---|--------|----|--------|--------|--------|---|-------|--------|--------|
| JAK3   | 2 | 6.67%  | 8  | 4.00%  | 0.6233 | 1.0000 | 1 | 2.27% | 0.5622 | 0.7871 | 0 | 0.00%  | 1  | 0.55%  | 1.0000 | 1.0000 | 1 | 2.27% | 1.0000 | 1.0000 |
| JUN    | 0 | 0.00%  | 1  | 0.50%  | 1.0000 | 1.0000 | 0 | 0.00% | 1.0000 | 1.0000 | 0 | 0.00%  | 0  | 0.00%  | 1.0000 | 1.0000 | 0 | 0.00% | 1.0000 | 1.0000 |
| KCNJ5  | 0 | 0.00%  | 7  | 3.50%  | 0.5987 | 1.0000 | 0 | 0.00% | 1.0000 | 1.0000 | 0 | 0.00%  | 4  | 2.19%  | 1.0000 | 1.0000 | 0 | 0.00% | 1.0000 | 1.0000 |
| KDM5C  | 1 | 3.33%  | 13 | 6.50%  | 0.7009 | 1.0000 | 1 | 2.27% | 1.0000 | 1.0000 | 0 | 0.00%  | 5  | 2.73%  | 1.0000 | 1.0000 | 1 | 2.27% | 1.0000 | 1.0000 |
| KDM6A  | 2 | 6.67%  | 10 | 5.00%  | 0.6595 | 1.0000 | 1 | 2.27% | 0.5622 | 0.7871 | 1 | 3.57%  | 3  | 1.64%  | 0.4367 | 1.0000 | 1 | 2.27% | 1.0000 | 1.0000 |
| KDR    | 3 | 10.00% | 14 | 7.00%  | 0.4713 | 1.0000 | 0 | 0.00% | 0.0626 | 0.5388 | 1 | 3.57%  | 2  | 1.09%  | 0.3490 | 1.0000 | 0 | 0.00% | 0.3889 | 1.0000 |
| KEAP1  | 4 | 13.33% | 6  | 3.00%  | 0.0284 | 0.8548 | 0 | 0.00% | 0.0238 | 0.5388 | 3 | 10.71% | 3  | 1.64%  | 0.0320 | 1.0000 | 0 | 0.00% | 0.0549 | 1.0000 |
| KIT    | 2 | 6.67%  | 17 | 8.50%  | 1.0000 | 1.0000 | 0 | 0.00% | 0.1611 | 0.5388 | 0 | 0.00%  | 5  | 2.73%  | 1.0000 | 1.0000 | 0 | 0.00% | 1.0000 | 1.0000 |
| KLF6   | 0 | 0.00%  | 7  | 3.50%  | 0.5987 | 1.0000 | 0 | 0.00% | 1.0000 | 1.0000 | 0 | 0.00%  | 1  | 0.55%  | 1.0000 | 1.0000 | 0 | 0.00% | 1.0000 | 1.0000 |
| KRAS   | 4 | 13.33% | 52 | 26.00% | 0.1721 | 1.0000 | 1 | 2.27% | 0.1511 | 0.5388 | 4 | 14.29% | 43 | 23.50% | 0.3372 | 1.0000 | 1 | 2.27% | 0.0714 | 1.0000 |
| LDHA   | 2 | 6.67%  | 5  | 2.50%  | 0.2280 | 1.0000 | 0 | 0.00% | 0.1611 | 0.5388 | 0 | 0.00%  | 0  | 0.00%  | 1.0000 | 1.0000 | 0 | 0.00% | 1.0000 | 1.0000 |
| LGR6   | 1 | 3.33%  | 11 | 5.50%  | 1.0000 | 1.0000 | 0 | 0.00% | 0.4054 | 0.6561 | 0 | 0.00%  | 3  | 1.64%  | 1.0000 | 1.0000 | 0 | 0.00% | 1.0000 | 1.0000 |
| LMO1   | 0 | 0.00%  | 2  | 1.00%  | 1.0000 | 1.0000 | 0 | 0.00% | 1.0000 | 1.0000 | 0 | 0.00%  | 0  | 0.00%  | 1.0000 | 1.0000 | 0 | 0.00% | 1.0000 | 1.0000 |
| MAGI2  | 3 | 10.00% | 14 | 7.00%  | 0.4713 | 1.0000 | 0 | 0.00% | 0.0626 | 0.5388 | 1 | 3.57%  | 3  | 1.64%  | 0.4367 | 1.0000 | 0 | 0.00% | 0.3889 | 1.0000 |
| MAP2K1 | 1 | 3.33%  | 2  | 1.00%  | 0.3438 | 1.0000 | 0 | 0.00% | 0.4054 | 0.6561 | 0 | 0.00%  | 1  | 0.55%  | 1.0000 | 1.0000 | 0 | 0.00% | 1.0000 | 1.0000 |
| MAP2K2 | 1 | 3.33%  | 3  | 1.50%  | 0.4305 | 1.0000 | 1 | 2.27% | 1.0000 | 1.0000 | 0 | 0.00%  | 1  | 0.55%  | 1.0000 | 1.0000 | 1 | 2.27% | 1.0000 | 1.0000 |
| MAP2K4 | 1 | 3.33%  | 8  | 4.00%  | 1.0000 | 1.0000 | 0 | 0.00% | 0.4054 | 0.6561 | 0 | 0.00%  | 4  | 2.19%  | 1.0000 | 1.0000 | 0 | 0.00% | 1.0000 | 1.0000 |
| MAP3K1 | 5 | 16.67% | 21 | 10.50% | 0.3511 | 1.0000 | 0 | 0.00% | 0.0088 | 0.5388 | 3 | 10.71% | 8  | 4.37%  | 0.1660 | 1.0000 | 0 | 0.00% | 0.0549 | 1.0000 |
| MAP3K8 | 2 | 6.67%  | 9  | 4.50%  | 0.6403 | 1.0000 | 0 | 0.00% | 0.1611 | 0.5388 | 0 | 0.00%  | 4  | 2.19%  | 1.0000 | 1.0000 | 0 | 0.00% | 1.0000 | 1.0000 |
| MAPK1  | 1 | 3.33%  | 2  | 1.00%  | 0.3438 | 1.0000 | 0 | 0.00% | 0.4054 | 0.6561 | 0 | 0.00%  | 0  | 0.00%  | 1.0000 | 1.0000 | 0 | 0.00% | 1.0000 | 1.0000 |
| MCL1   | 0 | 0.00%  | 1  | 0.50%  | 1.0000 | 1.0000 | 0 | 0.00% | 1.0000 | 1.0000 | 0 | 0.00%  | 0  | 0.00%  | 1.0000 | 1.0000 | 0 | 0.00% | 1.0000 | 1.0000 |
| MDM2   | 0 | 0.00%  | 4  | 2.00%  | 1.0000 | 1.0000 | 0 | 0.00% | 1.0000 | 1.0000 | 0 | 0.00%  | 2  | 1.09%  | 1.0000 | 1.0000 | 0 | 0.00% | 1.0000 | 1.0000 |
| MDM4   | 0 | 0.00%  | 3  | 1.50%  | 1.0000 | 1.0000 | 0 | 0.00% | 1.0000 | 1.0000 | 0 | 0.00%  | 0  | 0.00%  | 1.0000 | 1.0000 | 0 | 0.00% | 1.0000 | 1.0000 |
| MED12  | 2 | 6.67%  | 24 | 12.00% | 0.5437 | 1.0000 | 1 | 2.27% | 0.5622 | 0.7871 | 0 | 0.00%  | 13 | 7.10%  | 0.2242 | 1.0000 | 1 | 2.27% | 1.0000 | 1.0000 |
| MEF2B  | 1 | 3.33%  | 1  | 0.50%  | 0.2444 | 1.0000 | 0 | 0.00% | 0.4054 | 0.6561 | 0 | 0.00%  | 0  | 0.00%  | 1.0000 | 1.0000 | 0 | 0.00% | 1.0000 | 1.0000 |
| MEN1   | 2 | 6.67%  | 7  | 3.50%  | 0.3323 | 1.0000 | 0 | 0.00% | 0.1611 | 0.5388 | 0 | 0.00%  | 2  | 1.09%  | 1.0000 | 1.0000 | 0 | 0.00% | 1.0000 | 1.0000 |
| MET    | 3 | 10.00% | 12 | 6.00%  | 0.4228 | 1.0000 | 1 | 2.27% | 0.2971 | 0.6561 | 1 | 3.57%  | 4  | 2.19%  | 0.5129 | 1.0000 | 1 | 2.27% | 1.0000 | 1.0000 |
| MITF   | 2 | 6.67%  | 5  | 2.50%  | 0.2280 | 1.0000 | 1 | 2.27% | 0.5622 | 0.7871 | 0 | 0.00%  | 2  | 1.09%  | 1.0000 | 1.0000 | 1 | 2.27% | 1.0000 | 1.0000 |
| MLH1   | 2 | 6.67%  | 6  | 3.00%  | 0.2802 | 1.0000 | 0 | 0.00% | 0.1611 | 0.5388 | 1 | 3.57%  | 3  | 1.64%  | 0.4367 | 1.0000 | 0 | 0.00% | 0.3889 | 1.0000 |
| KMT2A  | 0 | 0.00%  | 18 | 9.00%  | 0.1397 | 1.0000 | 0 | 0.00% | 1.0000 | 1.0000 | 0 | 0.00%  | 6  | 3.28%  | 1.0000 | 1.0000 | 0 | 0.00% | 1.0000 | 1.0000 |
| KMT2D  | 0 | 0.00%  | 31 | 15.50% | 0.0183 | 0.6885 | 2 | 4.55% | 0.5113 | 0.7871 | 0 | 0.00%  | 18 | 9.84%  | 0.1393 | 1.0000 | 2 | 4.55% | 0.5180 | 1.0000 |
| KMT2C  | 0 | 0.00%  | 25 | 12.50% | 0.0526 | 0.8796 | 1 | 2.27% | 1.0000 | 1.0000 | 0 | 0.00%  | 12 | 6.56%  | 0.3743 | 1.0000 | 1 | 2.27% | 1.0000 | 1.0000 |
| MLST8  | 0 | 0.00%  | 3  | 1.50%  | 1.0000 | 1.0000 | 0 | 0.00% | 1.0000 | 1.0000 | 0 | 0.00%  | 0  | 0.00%  | 1.0000 | 1.0000 | 0 | 0.00% | 1.0000 | 1.0000 |
| MPL    | 4 | 13.33% | 7  | 3.50%  | 0.0406 | 0.8796 | 0 | 0.00% | 0.0238 | 0.5388 | 2 | 7.14%  | 2  | 1.09%  | 0.0862 | 1.0000 | 0 | 0.00% | 0.1479 | 1.0000 |
| MRE11A | 2 | 6.67%  | 8  | 4.00%  | 0.6233 | 1.0000 | 0 | 0.00% | 0.1611 | 0.5388 | 0 | 0.00%  | 4  | 2.19%  | 1.0000 | 1.0000 | 0 | 0.00% | 1.0000 | 1.0000 |
| MSH2   | 1 | 3.33%  | 8  | 4.00%  | 1.0000 | 1.0000 | 1 | 2.27% | 1.0000 | 1.0000 | 0 | 0.00%  | 0  | 0.00%  | 1.0000 | 1.0000 | 1 | 2.27% | 1.0000 | 1.0000 |
| MSH6   | 3 | 10.00% | 16 | 8.00%  | 0.7212 | 1.0000 | 1 | 2.27% | 0.2971 | 0.6561 | 1 | 3.57%  | 4  | 2.19%  | 0.5129 | 1.0000 | 1 | 2.27% | 1.0000 | 1.0000 |
| MTOR   | 3 | 10.00% | 25 | 12.50% | 1.0000 | 1.0000 | 1 | 2.27% | 0.2971 | 0.6561 | 1 | 3.57%  | 12 | 6.56%  | 1.0000 | 1.0000 | 1 | 2.27% | 1.0000 | 1.0000 |
| MYB    | 0 | 0.00%  | 7  | 3.50%  | 0.5987 | 1.0000 | 0 | 0.00% | 1.0000 | 1.0000 | 0 | 0.00%  | 2  | 1.09%  | 1.0000 | 1.0000 | 0 | 0.00% | 1.0000 | 1.0000 |
| MYC    | 0 | 0.00%  | 7  | 3.50%  | 0.5987 | 1.0000 | 1 | 2.27% | 1.0000 | 1.0000 | 0 | 0.00%  | 3  | 1.64%  | 1.0000 | 1.0000 | 1 | 2.27% | 1.0000 | 1.0000 |
| MYCL1  | 0 | 0.00%  | 2  | 1.00%  | 1.0000 | 1.0000 | 0 | 0.00% | 1.0000 | 1.0000 | 0 | 0.00%  | 0  | 0.00%  | 1.0000 | 1.0000 | 0 | 0.00% | 1.0000 | 1.0000 |
| MYCN   | 1 | 3.33%  | 4  | 2.00%  | 0.5061 | 1.0000 | 0 | 0.00% | 0.4054 | 0.6561 | 0 | 0.00%  | 3  | 1.64%  | 1.0000 | 1.0000 | 0 | 0.00% | 1.0000 | 1.0000 |
| MYD88  | 2 | 6.67%  | 3  | 1.50%  | 0.1281 | 1.0000 | 0 | 0.00% | 0.1611 | 0.5388 | 1 | 3.57%  | 0  | 0.00%  | 0.1327 | 1.0000 | 0 | 0.00% | 0.3889 | 1.0000 |
| NBN    | 1 | 3.33%  | 9  | 4.50%  | 1.0000 | 1.0000 | 0 | 0.00% | 0.4054 | 0.6561 | 0 | 0.00%  | 3  | 1.64%  | 1.0000 | 1.0000 | 0 | 0.00% | 1.0000 | 1.0000 |
| NCOA2  | 2 | 6.67%  | 11 | 5.50%  | 0.6802 | 1.0000 | 1 | 2.27% | 0.5622 | 0.7871 | 0 | 0.00%  | 3  | 1.64%  | 1.0000 | 1.0000 | 1 | 2.27% | 1.0000 | 1.0000 |
| NF1    | 4 | 13.33% | 20 | 10.00% | 0.5293 | 1.0000 | 0 | 0.00% | 0.0238 | 0.5388 | 2 | 7.14%  | 7  | 3.83%  | 0.3405 | 1.0000 | 0 | 0.00% | 0.1479 | 1.0000 |
| NF2    | 1 | 3.33%  | 7  | 3.50%  | 1.0000 | 1.0000 | 0 | 0.00% | 0.4054 | 0.6561 | 0 | 0.00%  | 2  | 1.09%  | 1.0000 | 1.0000 | 0 | 0.00% | 1.0000 | 1.0000 |
| NFE2L2 | 2 | 6.67%  | 15 | 7.50%  | 1.0000 | 1.0000 | 0 | 0.00% | 0.1611 | 0.5388 | 1 | 3.57%  | 12 | 6.56%  | 1.0000 | 1.0000 | 0 | 0.00% | 0.3889 | 1.0000 |
| NFKB1  | 1 | 3.33%  | 8  | 4.00%  | 1.0000 | 1.0000 | 0 | 0.00% | 0.4054 | 0.6561 | 0 | 0.00%  | 2  | 1.09%  | 1.0000 | 1.0000 | 0 | 0.00% | 1.0000 | 1.0000 |
| NFKB2  | 2 | 6.67%  | 9  | 4.50%  | 0.6403 | 1.0000 | 0 | 0.00% | 0.1611 | 0.5388 | 0 | 0.00%  | 5  | 2.73%  | 1.0000 | 1.0000 | 0 | 0.00% | 1.0000 | 1.0000 |
| NKX2-1 | 0 | 0.00%  | 0  | 0.00%  | 1.0000 | 1.0000 | 0 | 0.00% | 1.0000 | 1.0000 | 0 | 0.00%  | 0  | 0.00%  | 1.0000 | 1.0000 | 0 | 0.00% | 1.0000 | 1.0000 |
| NOTCH1 | 2 | 6.67%  | 8  | 4.00%  | 0.6233 | 1.0000 | 0 | 0.00% | 0.1611 | 0.5388 | 0 | 0.00%  | 4  | 2.19%  | 1.0000 | 1.0000 | 0 | 0.00% | 1.0000 | 1.0000 |

|         |    |        |     |        |        |        |    |        |        |        |    |        |     |        |        |        |    |        |        |        |
|---------|----|--------|-----|--------|--------|--------|----|--------|--------|--------|----|--------|-----|--------|--------|--------|----|--------|--------|--------|
| NOTCH2  | 1  | 3.33%  | 13  | 6.50%  | 0.7009 | 1.0000 | 1  | 2.27%  | 1.0000 | 1.0000 | 0  | 0.00%  | 4   | 2.19%  | 1.0000 | 1.0000 | 1  | 2.27%  | 1.0000 | 1.0000 |
| NOTCH3  | 2  | 6.67%  | 15  | 7.50%  | 1.0000 | 1.0000 | 1  | 2.27%  | 0.5622 | 0.7871 | 0  | 0.00%  | 10  | 5.46%  | 0.3652 | 1.0000 | 1  | 2.27%  | 1.0000 | 1.0000 |
| NOTCH4  | 1  | 3.33%  | 10  | 5.00%  | 1.0000 | 1.0000 | 2  | 4.55%  | 1.0000 | 1.0000 | 0  | 0.00%  | 6   | 3.28%  | 1.0000 | 1.0000 | 2  | 4.55%  | 0.5180 | 1.0000 |
| NPM1    | 0  | 0.00%  | 3   | 1.50%  | 1.0000 | 1.0000 | 0  | 0.00%  | 1.0000 | 1.0000 | 0  | 0.00%  | 1   | 0.55%  | 1.0000 | 1.0000 | 0  | 0.00%  | 1.0000 | 1.0000 |
| NRAS    | 0  | 0.00%  | 8   | 4.00%  | 0.6010 | 1.0000 | 1  | 2.27%  | 1.0000 | 1.0000 | 0  | 0.00%  | 6   | 3.28%  | 1.0000 | 1.0000 | 1  | 2.27%  | 1.0000 | 1.0000 |
| NTRK1   | 3  | 10.00% | 11  | 5.50%  | 0.4025 | 1.0000 | 2  | 4.55%  | 0.3895 | 0.6561 | 1  | 3.57%  | 3   | 1.64%  | 0.4367 | 1.0000 | 2  | 4.55%  | 1.0000 | 1.0000 |
| NTRK2   | 1  | 3.33%  | 10  | 5.00%  | 1.0000 | 1.0000 | 1  | 2.27%  | 1.0000 | 1.0000 | 0  | 0.00%  | 3   | 1.64%  | 1.0000 | 1.0000 | 1  | 2.27%  | 1.0000 | 1.0000 |
| NTRK3   | 2  | 6.67%  | 13  | 6.50%  | 1.0000 | 1.0000 | 1  | 2.27%  | 0.5622 | 0.7871 | 0  | 0.00%  | 4   | 2.19%  | 1.0000 | 1.0000 | 1  | 2.27%  | 1.0000 | 1.0000 |
| PAK7    | 1  | 3.33%  | 7   | 3.50%  | 1.0000 | 1.0000 | 0  | 0.00%  | 0.4054 | 0.6561 | 0  | 0.00%  | 1   | 0.55%  | 1.0000 | 1.0000 | 0  | 0.00%  | 1.0000 | 1.0000 |
| PALB2   | 2  | 6.67%  | 6   | 3.00%  | 0.2802 | 1.0000 | 2  | 4.55%  | 1.0000 | 1.0000 | 1  | 3.57%  | 3   | 1.64%  | 0.4367 | 1.0000 | 2  | 4.55%  | 1.0000 | 1.0000 |
| PARK2   | 0  | 0.00%  | 6   | 3.00%  | 1.0000 | 1.0000 | 0  | 0.00%  | 1.0000 | 1.0000 | 0  | 0.00%  | 2   | 1.09%  | 1.0000 | 1.0000 | 0  | 0.00%  | 1.0000 | 1.0000 |
| PARP1   | 1  | 3.33%  | 7   | 3.50%  | 1.0000 | 1.0000 | 0  | 0.00%  | 0.4054 | 0.6561 | 0  | 0.00%  | 4   | 2.19%  | 1.0000 | 1.0000 | 0  | 0.00%  | 1.0000 | 1.0000 |
| PAX5    | 0  | 0.00%  | 6   | 3.00%  | 1.0000 | 1.0000 | 0  | 0.00%  | 1.0000 | 1.0000 | 0  | 0.00%  | 2   | 1.09%  | 1.0000 | 1.0000 | 0  | 0.00%  | 1.0000 | 1.0000 |
| PBRM1   | 2  | 6.67%  | 11  | 5.50%  | 0.6802 | 1.0000 | 0  | 0.00%  | 0.1611 | 0.5388 | 0  | 0.00%  | 7   | 3.83%  | 0.5976 | 1.0000 | 0  | 0.00%  | 1.0000 | 1.0000 |
| PDGFRA  | 2  | 6.67%  | 12  | 6.00%  | 1.0000 | 1.0000 | 0  | 0.00%  | 0.1611 | 0.5388 | 0  | 0.00%  | 3   | 1.64%  | 1.0000 | 1.0000 | 0  | 0.00%  | 1.0000 | 1.0000 |
| PDGFRB  | 1  | 3.33%  | 10  | 5.00%  | 1.0000 | 1.0000 | 0  | 0.00%  | 0.4054 | 0.6561 | 0  | 0.00%  | 7   | 3.83%  | 0.5976 | 1.0000 | 0  | 0.00%  | 1.0000 | 1.0000 |
| PHOX2B  | 1  | 3.33%  | 6   | 3.00%  | 1.0000 | 1.0000 | 0  | 0.00%  | 0.4054 | 0.6561 | 0  | 0.00%  | 3   | 1.64%  | 1.0000 | 1.0000 | 0  | 0.00%  | 1.0000 | 1.0000 |
| PIK3C2G | 2  | 6.67%  | 12  | 6.00%  | 1.0000 | 1.0000 | 0  | 0.00%  | 0.1611 | 0.5388 | 0  | 0.00%  | 3   | 1.64%  | 1.0000 | 1.0000 | 0  | 0.00%  | 1.0000 | 1.0000 |
| PIK3CA  | 12 | 40.00% | 110 | 55.00% | 0.1692 | 1.0000 | 19 | 43.18% | 0.8148 | 1.0000 | 10 | 35.71% | 98  | 53.55% | 0.1039 | 1.0000 | 19 | 43.18% | 0.6250 | 1.0000 |
| PIK3CB  | 2  | 6.67%  | 13  | 6.50%  | 1.0000 | 1.0000 | 0  | 0.00%  | 0.1611 | 0.5388 | 0  | 0.00%  | 7   | 3.83%  | 0.5976 | 1.0000 | 0  | 0.00%  | 1.0000 | 1.0000 |
| PIK3CD  | 1  | 3.33%  | 10  | 5.00%  | 1.0000 | 1.0000 | 0  | 0.00%  | 0.4054 | 0.6561 | 0  | 0.00%  | 5   | 2.73%  | 1.0000 | 1.0000 | 0  | 0.00%  | 1.0000 | 1.0000 |
| PIK3CG  | 2  | 6.67%  | 14  | 7.00%  | 1.0000 | 1.0000 | 0  | 0.00%  | 0.1611 | 0.5388 | 0  | 0.00%  | 4   | 2.19%  | 1.0000 | 1.0000 | 0  | 0.00%  | 1.0000 | 1.0000 |
| PIK3R1  | 7  | 23.33% | 80  | 40.00% | 0.1057 | 1.0000 | 2  | 4.55%  | 0.0263 | 0.5388 | 5  | 17.86% | 69  | 37.70% | 0.0543 | 1.0000 | 2  | 4.55%  | 0.1012 | 1.0000 |
| PIK3R2  | 0  | 0.00%  | 6   | 3.00%  | 1.0000 | 1.0000 | 1  | 2.27%  | 1.0000 | 1.0000 | 0  | 0.00%  | 4   | 2.19%  | 1.0000 | 1.0000 | 1  | 2.27%  | 1.0000 | 1.0000 |
| PIK3R3  | 1  | 3.33%  | 8   | 4.00%  | 1.0000 | 1.0000 | 0  | 0.00%  | 0.4054 | 0.6561 | 0  | 0.00%  | 2   | 1.09%  | 1.0000 | 1.0000 | 0  | 0.00%  | 1.0000 | 1.0000 |
| PKM2    | 0  | 0.00%  | 5   | 2.50%  | 1.0000 | 1.0000 | 0  | 0.00%  | 1.0000 | 1.0000 | 0  | 0.00%  | 2   | 1.09%  | 1.0000 | 1.0000 | 0  | 0.00%  | 1.0000 | 1.0000 |
| PLK2    | 1  | 3.33%  | 9   | 4.50%  | 1.0000 | 1.0000 | 0  | 0.00%  | 0.4054 | 0.6561 | 0  | 0.00%  | 2   | 1.09%  | 1.0000 | 1.0000 | 0  | 0.00%  | 1.0000 | 1.0000 |
| PMS2    | 2  | 6.67%  | 10  | 5.00%  | 0.6595 | 1.0000 | 0  | 0.00%  | 0.1611 | 0.5388 | 2  | 7.14%  | 5   | 2.73%  | 0.2341 | 1.0000 | 0  | 0.00%  | 0.1479 | 1.0000 |
| PNRC1   | 1  | 3.33%  | 1   | 0.50%  | 0.2444 | 1.0000 | 0  | 0.00%  | 0.4054 | 0.6561 | 0  | 0.00%  | 0   | 0.00%  | 1.0000 | 1.0000 | 0  | 0.00%  | 1.0000 | 1.0000 |
| POLE    | 2  | 6.67%  | 26  | 13.00% | 0.5475 | 1.0000 | 1  | 2.27%  | 0.5622 | 0.7871 | 0  | 0.00%  | 9   | 4.92%  | 0.6108 | 1.0000 | 1  | 2.27%  | 1.0000 | 1.0000 |
| PPP2R1A | 11 | 36.67% | 14  | 7.00%  | 0.0000 | 0.0000 | 12 | 27.27% | 0.4484 | 0.7179 | 10 | 35.71% | 9   | 4.92%  | 0.0000 | 0.0000 | 12 | 27.27% | 0.6004 | 1.0000 |
| PPP6C   | 0  | 0.00%  | 5   | 2.50%  | 1.0000 | 1.0000 | 0  | 0.00%  | 1.0000 | 1.0000 | 0  | 0.00%  | 1   | 0.55%  | 1.0000 | 1.0000 | 0  | 0.00%  | 1.0000 | 1.0000 |
| PRDM1   | 3  | 10.00% | 8   | 4.00%  | 0.1601 | 1.0000 | 1  | 2.27%  | 0.2971 | 0.6561 | 1  | 3.57%  | 4   | 2.19%  | 0.5129 | 1.0000 | 1  | 2.27%  | 1.0000 | 1.0000 |
| PREX2   | 2  | 6.67%  | 11  | 5.50%  | 0.6802 | 1.0000 | 1  | 2.27%  | 0.5622 | 0.7871 | 0  | 0.00%  | 1   | 0.55%  | 1.0000 | 1.0000 | 1  | 2.27%  | 1.0000 | 1.0000 |
| PRKAA2  | 2  | 6.67%  | 6   | 3.00%  | 0.2802 | 1.0000 | 0  | 0.00%  | 0.1611 | 0.5388 | 0  | 0.00%  | 0   | 0.00%  | 1.0000 | 1.0000 | 0  | 0.00%  | 1.0000 | 1.0000 |
| PRKAR1A | 1  | 3.33%  | 3   | 1.50%  | 0.4305 | 1.0000 | 1  | 2.27%  | 1.0000 | 1.0000 | 0  | 0.00%  | 0   | 0.00%  | 1.0000 | 1.0000 | 1  | 2.27%  | 1.0000 | 1.0000 |
| PRKCI   | 1  | 3.33%  | 5   | 2.50%  | 0.5720 | 1.0000 | 0  | 0.00%  | 0.4054 | 0.6561 | 0  | 0.00%  | 1   | 0.55%  | 1.0000 | 1.0000 | 0  | 0.00%  | 1.0000 | 1.0000 |
| PTCH1   | 2  | 6.67%  | 19  | 9.50%  | 1.0000 | 1.0000 | 0  | 0.00%  | 0.1611 | 0.5388 | 0  | 0.00%  | 9   | 4.92%  | 0.6108 | 1.0000 | 0  | 0.00%  | 1.0000 | 1.0000 |
| PTEN    | 4  | 13.33% | 159 | 79.50% | 0.0000 | 0.0000 | 1  | 2.27%  | 0.1511 | 0.5388 | 2  | 7.14%  | 143 | 78.14% | 0.0000 | 0.0000 | 1  | 2.27%  | 0.5559 | 1.0000 |
| PTPN11  | 1  | 3.33%  | 6   | 3.00%  | 1.0000 | 1.0000 | 1  | 2.27%  | 1.0000 | 1.0000 | 0  | 0.00%  | 2   | 1.09%  | 1.0000 | 1.0000 | 1  | 2.27%  | 1.0000 | 1.0000 |
| PTPRD   | 3  | 10.00% | 19  | 9.50%  | 1.0000 | 1.0000 | 2  | 4.55%  | 0.3895 | 0.6561 | 1  | 3.57%  | 8   | 4.37%  | 1.0000 | 1.0000 | 2  | 4.55%  | 1.0000 | 1.0000 |
| PTPRS   | 1  | 3.33%  | 17  | 8.50%  | 0.4806 | 1.0000 | 1  | 2.27%  | 1.0000 | 1.0000 | 0  | 0.00%  | 11  | 6.01%  | 0.3664 | 1.0000 | 1  | 2.27%  | 1.0000 | 1.0000 |
| PTPRT   | 2  | 6.67%  | 13  | 6.50%  | 1.0000 | 1.0000 | 2  | 4.55%  | 1.0000 | 1.0000 | 0  | 0.00%  | 6   | 3.28%  | 1.0000 | 1.0000 | 2  | 4.55%  | 0.5180 | 1.0000 |
| RAC1    | 0  | 0.00%  | 0   | 0.00%  | 1.0000 | 1.0000 | 1  | 2.27%  | 1.0000 | 1.0000 | 0  | 0.00%  | 0   | 0.00%  | 1.0000 | 1.0000 | 1  | 2.27%  | 1.0000 | 1.0000 |
| RAD50   | 2  | 6.67%  | 11  | 5.50%  | 0.6802 | 1.0000 | 0  | 0.00%  | 0.1611 | 0.5388 | 0  | 0.00%  | 2   | 1.09%  | 1.0000 | 1.0000 | 0  | 0.00%  | 1.0000 | 1.0000 |
| RAF1    | 0  | 0.00%  | 7   | 3.50%  | 0.5987 | 1.0000 | 0  | 0.00%  | 1.0000 | 1.0000 | 0  | 0.00%  | 1   | 0.55%  | 1.0000 | 1.0000 | 0  | 0.00%  | 1.0000 | 1.0000 |
| RARA    | 1  | 3.33%  | 2   | 1.00%  | 0.3438 | 1.0000 | 0  | 0.00%  | 0.4054 | 0.6561 | 0  | 0.00%  | 1   | 0.55%  | 1.0000 | 1.0000 | 0  | 0.00%  | 1.0000 | 1.0000 |
| RB1     | 3  | 10.00% | 20  | 10.00% | 1.0000 | 1.0000 | 0  | 0.00%  | 0.0626 | 0.5388 | 1  | 3.57%  | 8   | 4.37%  | 1.0000 | 1.0000 | 0  | 0.00%  | 0.3889 | 1.0000 |
| REL     | 1  | 3.33%  | 7   | 3.50%  | 1.0000 | 1.0000 | 0  | 0.00%  | 0.4054 | 0.6561 | 0  | 0.00%  | 1   | 0.55%  | 1.0000 | 1.0000 | 0  | 0.00%  | 1.0000 | 1.0000 |
| RET     | 0  | 0.00%  | 11  | 5.50%  | 0.3672 | 1.0000 | 0  | 0.00%  | 1.0000 | 1.0000 | 0  | 0.00%  | 5   | 2.73%  | 1.0000 | 1.0000 | 0  | 0.00%  | 1.0000 | 1.0000 |
| RICTOR  | 2  | 6.67%  | 12  | 6.00%  | 1.0000 | 1.0000 | 1  | 2.27%  | 0.5622 | 0.7871 | 0  | 0.00%  | 2   | 1.09%  | 1.0000 | 1.0000 | 1  | 2.27%  | 1.0000 | 1.0000 |
| RNF43   | 1  | 3.33%  | 12  | 6.00%  | 1.0000 | 1.0000 | 0  | 0.00%  | 0.4054 | 0.6561 | 1  | 3.57%  | 7   | 3.83%  | 1.0000 | 1.0000 | 0  | 0.00%  | 0.3889 | 1.0000 |

|          |    |        |    |        |        |        |    |        |        |        |    |        |    |        |        |        |    |        |        |        |
|----------|----|--------|----|--------|--------|--------|----|--------|--------|--------|----|--------|----|--------|--------|--------|----|--------|--------|--------|
| ROR2     | 3  | 10.00% | 9  | 4.50%  | 0.1950 | 1.0000 | 0  | 0.00%  | 0.0626 | 0.5388 | 1  | 3.57%  | 4  | 2.19%  | 0.5129 | 1.0000 | 0  | 0.00%  | 0.3889 | 1.0000 |
| ROS1     | 2  | 6.67%  | 18 | 9.00%  | 1.0000 | 1.0000 | 0  | 0.00%  | 0.1611 | 0.5388 | 0  | 0.00%  | 4  | 2.19%  | 1.0000 | 1.0000 | 0  | 0.00%  | 1.0000 | 1.0000 |
| RPS6KB1  | 0  | 0.00%  | 4  | 2.00%  | 1.0000 | 1.0000 | 0  | 0.00%  | 1.0000 | 1.0000 | 0  | 0.00%  | 1  | 0.55%  | 1.0000 | 1.0000 | 0  | 0.00%  | 1.0000 | 1.0000 |
| RPTOR    | 1  | 3.33%  | 8  | 4.00%  | 1.0000 | 1.0000 | 0  | 0.00%  | 0.4054 | 0.6561 | 0  | 0.00%  | 4  | 2.19%  | 1.0000 | 1.0000 | 0  | 0.00%  | 1.0000 | 1.0000 |
| RUNX1    | 0  | 0.00%  | 9  | 4.50%  | 0.6098 | 1.0000 | 0  | 0.00%  | 1.0000 | 1.0000 | 0  | 0.00%  | 4  | 2.19%  | 1.0000 | 1.0000 | 0  | 0.00%  | 1.0000 | 1.0000 |
| SDHB     | 0  | 0.00%  | 2  | 1.00%  | 1.0000 | 1.0000 | 0  | 0.00%  | 1.0000 | 1.0000 | 0  | 0.00%  | 2  | 1.09%  | 1.0000 | 1.0000 | 0  | 0.00%  | 1.0000 | 1.0000 |
| SETD2    | 1  | 3.33%  | 20 | 10.00% | 0.3254 | 1.0000 | 2  | 4.55%  | 1.0000 | 1.0000 | 0  | 0.00%  | 6  | 3.28%  | 1.0000 | 1.0000 | 2  | 4.55%  | 0.5180 | 1.0000 |
| SF3B1    | 3  | 10.00% | 15 | 7.50%  | 0.7126 | 1.0000 | 0  | 0.00%  | 0.0626 | 0.5388 | 1  | 3.57%  | 4  | 2.19%  | 0.5129 | 1.0000 | 0  | 0.00%  | 0.3889 | 1.0000 |
| SHQ1     | 1  | 3.33%  | 7  | 3.50%  | 1.0000 | 1.0000 | 1  | 2.27%  | 1.0000 | 1.0000 | 0  | 0.00%  | 1  | 0.55%  | 1.0000 | 1.0000 | 1  | 2.27%  | 1.0000 | 1.0000 |
| SMAD2    | 3  | 10.00% | 8  | 4.00%  | 0.1601 | 1.0000 | 0  | 0.00%  | 0.0626 | 0.5388 | 1  | 3.57%  | 3  | 1.64%  | 0.4367 | 1.0000 | 0  | 0.00%  | 0.3889 | 1.0000 |
| SMAD3    | 1  | 3.33%  | 6  | 3.00%  | 1.0000 | 1.0000 | 1  | 2.27%  | 1.0000 | 1.0000 | 0  | 0.00%  | 3  | 1.64%  | 1.0000 | 1.0000 | 1  | 2.27%  | 1.0000 | 1.0000 |
| SMAD4    | 2  | 6.67%  | 5  | 2.50%  | 0.2280 | 1.0000 | 0  | 0.00%  | 0.1611 | 0.5388 | 1  | 3.57%  | 0  | 0.00%  | 0.1327 | 1.0000 | 0  | 0.00%  | 0.3889 | 1.0000 |
| SMARCA4  | 5  | 16.67% | 15 | 7.50%  | 0.1533 | 1.0000 | 0  | 0.00%  | 0.0088 | 0.5388 | 3  | 10.71% | 9  | 4.92%  | 0.2020 | 1.0000 | 0  | 0.00%  | 0.0549 | 1.0000 |
| SMARCB1  | 1  | 3.33%  | 6  | 3.00%  | 1.0000 | 1.0000 | 0  | 0.00%  | 0.4054 | 0.6561 | 0  | 0.00%  | 4  | 2.19%  | 1.0000 | 1.0000 | 0  | 0.00%  | 1.0000 | 1.0000 |
| SMO      | 2  | 6.67%  | 4  | 2.00%  | 0.1768 | 1.0000 | 1  | 2.27%  | 0.5622 | 0.7871 | 0  | 0.00%  | 0  | 0.00%  | 1.0000 | 1.0000 | 1  | 2.27%  | 1.0000 | 1.0000 |
| SOCS1    | 0  | 0.00%  | 0  | 0.00%  | 1.0000 | 1.0000 | 0  | 0.00%  | 1.0000 | 1.0000 | 0  | 0.00%  | 0  | 0.00%  | 1.0000 | 1.0000 | 0  | 0.00%  | 1.0000 | 1.0000 |
| SOX2     | 1  | 3.33%  | 3  | 1.50%  | 0.4305 | 1.0000 | 0  | 0.00%  | 0.4054 | 0.6561 | 0  | 0.00%  | 0  | 0.00%  | 1.0000 | 1.0000 | 0  | 0.00%  | 1.0000 | 1.0000 |
| SPOP     | 5  | 16.67% | 18 | 9.00%  | 0.1955 | 1.0000 | 3  | 6.82%  | 0.2569 | 0.6561 | 5  | 17.86% | 13 | 7.10%  | 0.0708 | 1.0000 | 3  | 6.82%  | 0.2476 | 1.0000 |
| SRC      | 1  | 3.33%  | 3  | 1.50%  | 0.4305 | 1.0000 | 0  | 0.00%  | 0.4054 | 0.6561 | 0  | 0.00%  | 1  | 0.55%  | 1.0000 | 1.0000 | 0  | 0.00%  | 1.0000 | 1.0000 |
| SRSF2    | 0  | 0.00%  | 0  | 0.00%  | 1.0000 | 1.0000 | 0  | 0.00%  | 1.0000 | 1.0000 | 0  | 0.00%  | 0  | 0.00%  | 1.0000 | 1.0000 | 0  | 0.00%  | 1.0000 | 1.0000 |
| STAG2    | 2  | 6.67%  | 18 | 9.00%  | 1.0000 | 1.0000 | 2  | 4.55%  | 1.0000 | 1.0000 | 0  | 0.00%  | 7  | 3.83%  | 0.5976 | 1.0000 | 2  | 4.55%  | 0.5180 | 1.0000 |
| STK11    | 1  | 3.33%  | 2  | 1.00%  | 0.3438 | 1.0000 | 0  | 0.00%  | 0.4054 | 0.6561 | 0  | 0.00%  | 1  | 0.55%  | 1.0000 | 1.0000 | 0  | 0.00%  | 1.0000 | 1.0000 |
| SUFU     | 0  | 0.00%  | 3  | 1.50%  | 1.0000 | 1.0000 | 0  | 0.00%  | 1.0000 | 1.0000 | 0  | 0.00%  | 2  | 1.09%  | 1.0000 | 1.0000 | 0  | 0.00%  | 1.0000 | 1.0000 |
| SYK      | 1  | 3.33%  | 4  | 2.00%  | 0.5061 | 1.0000 | 0  | 0.00%  | 0.4054 | 0.6561 | 0  | 0.00%  | 2  | 1.09%  | 1.0000 | 1.0000 | 0  | 0.00%  | 1.0000 | 1.0000 |
| TBK1     | 1  | 3.33%  | 6  | 3.00%  | 1.0000 | 1.0000 | 0  | 0.00%  | 0.4054 | 0.6561 | 0  | 0.00%  | 1  | 0.55%  | 1.0000 | 1.0000 | 0  | 0.00%  | 1.0000 | 1.0000 |
| TEK      | 2  | 6.67%  | 15 | 7.50%  | 1.0000 | 1.0000 | 0  | 0.00%  | 0.1611 | 0.5388 | 0  | 0.00%  | 6  | 3.28%  | 1.0000 | 1.0000 | 0  | 0.00%  | 1.0000 | 1.0000 |
| TERT     | 3  | 10.00% | 4  | 2.00%  | 0.0490 | 0.8796 | 0  | 0.00%  | 0.0626 | 0.5388 | 1  | 3.57%  | 0  | 0.00%  | 0.1327 | 1.0000 | 0  | 0.00%  | 0.3889 | 1.0000 |
| TET1     | 2  | 6.67%  | 22 | 11.00% | 0.7485 | 1.0000 | 1  | 2.27%  | 0.5622 | 0.7871 | 0  | 0.00%  | 9  | 4.92%  | 0.6108 | 1.0000 | 1  | 2.27%  | 1.0000 | 1.0000 |
| TET2     | 3  | 10.00% | 13 | 6.50%  | 0.4460 | 1.0000 | 0  | 0.00%  | 0.0626 | 0.5388 | 1  | 3.57%  | 6  | 3.28%  | 1.0000 | 1.0000 | 0  | 0.00%  | 0.3889 | 1.0000 |
| TGFBR2   | 0  | 0.00%  | 6  | 3.00%  | 1.0000 | 1.0000 | 0  | 0.00%  | 1.0000 | 1.0000 | 0  | 0.00%  | 3  | 1.64%  | 1.0000 | 1.0000 | 0  | 0.00%  | 1.0000 | 1.0000 |
| TMPRSS2  | 1  | 3.33%  | 7  | 3.50%  | 1.0000 | 1.0000 | 0  | 0.00%  | 0.4054 | 0.6561 | 0  | 0.00%  | 2  | 1.09%  | 1.0000 | 1.0000 | 0  | 0.00%  | 1.0000 | 1.0000 |
| TNFAIP3  | 3  | 10.00% | 2  | 1.00%  | 0.0168 | 0.6885 | 0  | 0.00%  | 0.0626 | 0.5388 | 1  | 3.57%  | 1  | 0.55%  | 0.2483 | 1.0000 | 0  | 0.00%  | 0.3889 | 1.0000 |
| TNFRSF14 | 1  | 3.33%  | 1  | 0.50%  | 0.2444 | 1.0000 | 1  | 2.27%  | 1.0000 | 1.0000 | 0  | 0.00%  | 0  | 0.00%  | 1.0000 | 1.0000 | 1  | 2.27%  | 1.0000 | 1.0000 |
| TOP1     | 1  | 3.33%  | 10 | 5.00%  | 1.0000 | 1.0000 | 0  | 0.00%  | 0.4054 | 0.6561 | 0  | 0.00%  | 2  | 1.09%  | 1.0000 | 1.0000 | 0  | 0.00%  | 1.0000 | 1.0000 |
| TP53     | 15 | 50.00% | 27 | 13.50% | 0.0001 | 0.0100 | 39 | 88.64% | 0.0012 | 0.0602 | 13 | 46.43% | 21 | 11.48% | 0.0001 | 0.0151 | 39 | 88.64% | 0.0003 | 0.0001 |
| TP63     | 2  | 6.67%  | 12 | 6.00%  | 1.0000 | 1.0000 | 0  | 0.00%  | 0.1611 | 0.5388 | 0  | 0.00%  | 7  | 3.83%  | 0.5976 | 1.0000 | 0  | 0.00%  | 1.0000 | 1.0000 |
| TSC1     | 2  | 6.67%  | 8  | 4.00%  | 0.6233 | 1.0000 | 1  | 2.27%  | 0.5622 | 0.7871 | 0  | 0.00%  | 2  | 1.09%  | 1.0000 | 1.0000 | 1  | 2.27%  | 1.0000 | 1.0000 |
| TSC2     | 2  | 6.67%  | 13 | 6.50%  | 1.0000 | 1.0000 | 0  | 0.00%  | 0.1611 | 0.5388 | 0  | 0.00%  | 8  | 4.37%  | 0.6009 | 1.0000 | 0  | 0.00%  | 1.0000 | 1.0000 |
| TSHR     | 0  | 0.00%  | 7  | 3.50%  | 0.5987 | 1.0000 | 0  | 0.00%  | 1.0000 | 1.0000 | 0  | 0.00%  | 2  | 1.09%  | 1.0000 | 1.0000 | 0  | 0.00%  | 1.0000 | 1.0000 |
| U2AF1    | 2  | 6.67%  | 3  | 1.50%  | 0.1281 | 1.0000 | 1  | 2.27%  | 0.5622 | 0.7871 | 1  | 3.57%  | 1  | 0.55%  | 0.2483 | 1.0000 | 1  | 2.27%  | 1.0000 | 1.0000 |
| VHL      | 0  | 0.00%  | 3  | 1.50%  | 1.0000 | 1.0000 | 0  | 0.00%  | 1.0000 | 1.0000 | 0  | 0.00%  | 2  | 1.09%  | 1.0000 | 1.0000 | 0  | 0.00%  | 1.0000 | 1.0000 |
| WAS      | 3  | 10.00% | 9  | 4.50%  | 0.1950 | 1.0000 | 1  | 2.27%  | 0.2971 | 0.6561 | 1  | 3.57%  | 4  | 2.19%  | 0.5129 | 1.0000 | 1  | 2.27%  | 1.0000 | 1.0000 |
| WNK1     | 2  | 6.67%  | 11 | 5.50%  | 0.6802 | 1.0000 | 0  | 0.00%  | 0.1611 | 0.5388 | 0  | 0.00%  | 3  | 1.64%  | 1.0000 | 1.0000 | 0  | 0.00%  | 1.0000 | 1.0000 |
| WT1      | 0  | 0.00%  | 3  | 1.50%  | 1.0000 | 1.0000 | 0  | 0.00%  | 1.0000 | 1.0000 | 0  | 0.00%  | 2  | 1.09%  | 1.0000 | 1.0000 | 0  | 0.00%  | 1.0000 | 1.0000 |
| XPO1     | 1  | 3.33%  | 12 | 6.00%  | 1.0000 | 1.0000 | 0  | 0.00%  | 0.4054 | 0.6561 | 0  | 0.00%  | 2  | 1.09%  | 1.0000 | 1.0000 | 0  | 0.00%  | 1.0000 | 1.0000 |
| YAP1     | 2  | 6.67%  | 4  | 2.00%  | 0.1768 | 1.0000 | 0  | 0.00%  | 0.1611 | 0.5388 | 0  | 0.00%  | 1  | 0.55%  | 1.0000 | 1.0000 | 0  | 0.00%  | 1.0000 | 1.0000 |
| YES1     | 2  | 6.67%  | 8  | 4.00%  | 0.6233 | 1.0000 | 0  | 0.00%  | 0.1611 | 0.5388 | 0  | 0.00%  | 4  | 2.19%  | 1.0000 | 1.0000 | 0  | 0.00%  | 1.0000 | 1.0000 |
| ZRSR2    | 0  | 0.00%  | 6  | 3.00%  | 1.0000 | 1.0000 | 0  | 0.00%  | 1.0000 | 1.0000 | 0  | 0.00%  | 3  | 1.64%  | 1.0000 | 1.0000 | 0  | 0.00%  | 1.0000 | 1.0000 |
