# Supplementary material
Source: PubMed Central journal article supplement (PMC5708127)
Supplement: NIHMS894348-supplement-Supp_TableS2.pdf [file NIHMS894348-supplement-Supp_TableS2.pdf]

**Supplementary Table S2.** Sequencing statistics of endometrial clear cell carcinomas subjected to targeted massively parallel sequencing.

| Sample | Tissue Type | Target Territory | Total Reads | Percent Selected Bases | Mean Target Coverage | Percent Selected Bases 2X | Percent Selected Bases 10X | Percent Selected Bases 20X | Percent Selected Bases 30X | Percent Selected Bases 40X | Percent Selected Bases 50X | Percent Selected Bases 100X |
|--------|-------------|------------------|-------------|------------------------|----------------------|---------------------------|----------------------------|----------------------------|----------------------------|----------------------------|----------------------------|-----------------------------|
| CC01N  | Normal      | 932513           | 5852526     | 84.01%                 | 240.62               | 98.92%                    | 98.23%                     | 97.39%                     | 96.25%                     | 95.31%                     | 94.53%                     | 91.71%                      |
| CC01P  | Tumor       | 932513           | 14468734    | 81.21%                 | 486.12               | 99.18%                    | 98.71%                     | 98.36%                     | 98.05%                     | 97.63%                     | 97.07%                     | 94.64%                      |
| CC02N  | Normal      | 932513           | 4883083     | 80.93%                 | 117.75               | 98.76%                    | 97.53%                     | 95.95%                     | 94.77%                     | 93.44%                     | 91.73%                     | 61.68%                      |
| CC02P  | Tumor       | 932513           | 6534550     | 77.64%                 | 155.83               | 99.04%                    | 98.24%                     | 97.31%                     | 96.21%                     | 95.11%                     | 94.11%                     | 81.18%                      |
| CC04N  | Normal      | 932513           | 6302836     | 84.89%                 | 253.82               | 98.90%                    | 97.98%                     | 97.18%                     | 96.34%                     | 95.60%                     | 94.95%                     | 91.90%                      |
| CC04P  | Tumor       | 932513           | 11442051    | 79.61%                 | 340.11               | 99.13%                    | 98.53%                     | 98.12%                     | 97.75%                     | 97.17%                     | 96.51%                     | 94.03%                      |
| CC05N  | Normal      | 932513           | 6729098     | 84.08%                 | 262.65               | 99.01%                    | 98.25%                     | 97.56%                     | 96.65%                     | 95.79%                     | 94.95%                     | 91.28%                      |
| CC05P  | Tumor       | 932513           | 13797242    | 81.83%                 | 501.48               | 99.22%                    | 98.68%                     | 98.37%                     | 98.09%                     | 97.75%                     | 97.42%                     | 95.03%                      |
| CC06N  | Normal      | 932513           | 4732402     | 83.63%                 | 168.24               | 98.80%                    | 97.66%                     | 96.30%                     | 95.09%                     | 94.13%                     | 93.14%                     | 79.98%                      |
| CC06P  | Tumor       | 932513           | 10549639    | 80.58%                 | 354.33               | 99.14%                    | 98.56%                     | 98.22%                     | 97.86%                     | 97.39%                     | 96.80%                     | 94.12%                      |
| CC07N  | Normal      | 932513           | 4769783     | 85.95%                 | 213.84               | 98.85%                    | 97.96%                     | 96.84%                     | 95.78%                     | 94.84%                     | 94.04%                     | 90.56%                      |
| CC07P  | Tumor       | 932513           | 11957431    | 82.59%                 | 413.33               | 99.11%                    | 98.53%                     | 98.12%                     | 97.78%                     | 97.44%                     | 97.05%                     | 94.42%                      |
| CC08N  | Normal      | 932513           | 7069574     | 84.25%                 | 286.56               | 99.02%                    | 98.36%                     | 97.70%                     | 96.93%                     | 95.96%                     | 95.15%                     | 92.53%                      |
| CC08P  | Tumor       | 932513           | 12428930    | 81.93%                 | 451.85               | 99.12%                    | 98.57%                     | 98.27%                     | 97.97%                     | 97.68%                     | 97.28%                     | 94.78%                      |
| CC11N  | Normal      | 932513           | 5986548     | 84.82%                 | 256.49               | 99.05%                    | 98.35%                     | 97.50%                     | 96.35%                     | 95.33%                     | 94.56%                     | 87.26%                      |
| CC11P  | Tumor       | 932513           | 11017994    | 82.43%                 | 414.42               | 99.10%                    | 98.53%                     | 98.10%                     | 97.74%                     | 97.37%                     | 96.91%                     | 94.15%                      |
| CC12N  | Normal      | 932513           | 5738510     | 84.41%                 | 246.59               | 98.91%                    | 98.00%                     | 97.21%                     | 96.28%                     | 95.40%                     | 94.61%                     | 91.55%                      |
| CC12P  | Tumor       | 932513           | 9631011     | 78.83%                 | 282.91               | 99.09%                    | 98.48%                     | 97.91%                     | 97.14%                     | 96.33%                     | 95.63%                     | 93.01%                      |
| CC13N  | Normal      | 932513           | 4988944     | 84.70%                 | 215.74               | 98.78%                    | 97.74%                     | 96.72%                     | 95.60%                     | 94.63%                     | 93.69%                     | 89.12%                      |
| CC13P  | Tumor       | 932513           | 13378392    | 82.85%                 | 516.16               | 99.11%                    | 98.65%                     | 98.26%                     | 97.99%                     | 97.78%                     | 97.54%                     | 95.74%                      |
| CC14N  | Normal      | 932513           | 6450573     | 84.14%                 | 246.51               | 99.06%                    | 98.38%                     | 97.60%                     | 96.41%                     | 95.35%                     | 94.62%                     | 89.78%                      |
| CC14P  | Tumor       | 932513           | 12510403    | 79.29%                 | 337.52               | 99.14%                    | 98.58%                     | 98.22%                     | 97.92%                     | 97.54%                     | 97.02%                     | 94.07%                      |
| CC15N  | Normal      | 932513           | 7063177     | 83.44%                 | 233.07               | 98.89%                    | 97.98%                     | 96.95%                     | 96.07%                     | 95.22%                     | 94.45%                     | 89.14%                      |
| CC15P  | Tumor       | 932513           | 11301185    | 83.29%                 | 425.33               | 99.05%                    | 98.39%                     | 97.88%                     | 97.48%                     | 97.03%                     | 96.60%                     | 94.39%                      |
| CC16N  | Normal      | 932513           | 7128088     | 84.32%                 | 308.15               | 98.97%                    | 98.23%                     | 97.68%                     | 97.12%                     | 96.41%                     | 95.64%                     | 92.84%                      |
| CC16P  | Tumor       | 932513           | 15637707    | 83.24%                 | 626.07               | 99.16%                    | 98.68%                     | 98.36%                     | 98.11%                     | 97.80%                     | 97.46%                     | 95.60%                      |
| CC17N  | Normal      | 932513           | 6492422     | 83.00%                 | 210.41               | 98.96%                    | 98.19%                     | 97.03%                     | 95.78%                     | 94.84%                     | 93.88%                     | 80.79%                      |
| CC17P  | Tumor       | 932513           | 12589021    | 83.72%                 | 525.95               | 99.03%                    | 98.55%                     | 98.16%                     | 97.84%                     | 97.54%                     | 97.23%                     | 94.96%                      |
| CC18N  | Normal      | 932513           | 6891581     | 85.36%                 | 290.76               | 99.00%                    | 98.27%                     | 97.62%                     | 96.76%                     | 95.92%                     | 95.13%                     | 91.99%                      |
| CC18P  | Tumor       | 932513           | 12111162    | 83.04%                 | 445.33               | 99.07%                    | 98.43%                     | 98.01%                     | 97.63%                     | 97.23%                     | 96.82%                     | 94.86%                      |
| CC19N  | Normal      | 932513           | 7454065     | 84.38%                 | 312.86               | 99.00%                    | 98.38%                     | 97.83%                     | 97.23%                     | 96.55%                     | 95.68%                     | 93.06%                      |
| CC19P  | Tumor       | 932513           | 13084765    | 82.77%                 | 502.74               | 99.18%                    | 98.73%                     | 98.36%                     | 98.07%                     | 97.82%                     | 97.50%                     | 95.24%                      |
| CC20N  | Normal      | 932513           | 6577028     | 85.07%                 | 287.91               | 98.83%                    | 97.95%                     | 97.13%                     | 96.34%                     | 95.53%                     | 94.77%                     | 91.53%                      |
| CC20P  | Tumor       | 932513           | 22175974    | 81.30%                 | 838.35               | 99.21%                    | 98.77%                     | 98.50%                     | 98.27%                     | 98.09%                     | 97.90%                     | 96.71%                      |
| CC21N  | Normal      | 932513           | 4648727     | 83.62%                 | 154.26               | 98.78%                    | 97.53%                     | 96.20%                     | 94.93%                     | 93.78%                     | 92.62%                     | 76.78%                      |
| CC21P  | Tumor       | 932513           | 10714176    | 81.85%                 | 363.17               | 99.09%                    | 98.47%                     | 98.03%                     | 97.65%                     | 97.23%                     | 96.81%                     | 94.20%                      |
| CC22N  | Normal      | 932513           | 14636844    | 75.91%                 | 282                  | 99.15%                    | 98.60%                     | 98.14%                     | 97.44%                     | 96.67%                     | 95.85%                     | 88.69%                      |
| CC22P  | Tumor       | 932513           | 13741153    | 81.55%                 | 484.82               | 99.14%                    | 98.56%                     | 98.13%                     | 97.80%                     | 97.42%                     | 97.02%                     | 94.69%                      |
| CC23N  | Normal      | 932513           | 7187569     | 84.45%                 | 309.1                | 98.85%                    | 97.90%                     | 97.12%                     | 96.34%                     | 95.55%                     | 94.84%                     | 91.28%                      |
| CC23P  | Tumor       | 932513           | 17307028    | 81.96%                 | 673.41               | 99.08%                    | 98.59%                     | 98.21%                     | 97.88%                     | 97.57%                     | 97.31%                     | 95.88%                      |
| CC24N  | Normal      | 932513           | 6469651     | 86.96%                 | 279.38               | 98.85%                    | 97.93%                     | 97.03%                     | 96.16%                     | 95.36%                     | 94.59%                     | 91.30%                      |
| CC24P  | Tumor       | 932513           | 11594259    | 85.41%                 | 475.39               | 99.02%                    | 98.44%                     | 97.90%                     | 97.52%                     | 97.19%                     | 96.85%                     | 94.89%                      |
| CC25N  | Normal      | 932513           | 7372409     | 86.94%                 | 276.16               | 99.07%                    | 98.41%                     | 97.71%                     | 96.62%                     | 95.66%                     | 94.94%                     | 91.47%                      |
| CC25P  | Tumor       | 932513           | 12871773    | 85.53%                 | 479.42               | 99.15%                    | 98.57%                     | 98.14%                     | 97.75%                     | 97.39%                     | 96.91%                     | 94.86%                      |
| CC26N  | Normal      | 932513           | 5607336     | 86.68%                 | 218.12               | 98.86%                    | 97.86%                     | 96.78%                     | 95.83%                     | 94.77%                     | 93.79%                     | 89.38%                      |
| CC26P  | Tumor       | 932513           | 11227499    | 86.14%                 | 454.1                | 99.08%                    | 98.47%                     | 98.04%                     | 97.73%                     | 97.36%                     | 96.85%                     | 94.12%                      |
| CC27N  | Normal      | 932513           | 12813290    | 82.70%                 | 505.84               | 98.98%                    | 98.45%                     | 97.90%                     | 97.52%                     | 97.23%                     | 96.83%                     | 94.97%                      |
| CC27P  | Tumor       | 932513           | 9930896     | 80.54%                 | 186.88               | 99.05%                    | 98.34%                     | 97.58%                     | 96.67%                     | 95.77%                     | 94.97%                     | 89.07%                      |
| CC28N  | Normal      | 932513           | 4338192     | 88.97%                 | 172.65               | 98.82%                    | 97.44%                     | 96.10%                     | 94.84%                     | 93.72%                     | 92.59%                     | 79.61%                      |
| CC28P  | Tumor       | 932513           | 12112290    | 85.31%                 | 388.28               | 99.08%                    | 98.47%                     | 98.05%                     | 97.65%                     | 97.15%                     | 96.62%                     | 94.06%                      |
| CC29N  | Normal      | 932513           | 5044671     | 88.35%                 | 204.45               | 98.78%                    | 97.58%                     | 96.37%                     | 95.24%                     | 94.26%                     | 93.30%                     | 87.27%                      |
| CC29P  | Tumor       | 932513           | 11187911    | 86.57%                 | 459.74               | 99.11%                    | 98.52%                     | 98.02%                     | 97.57%                     | 97.08%                     | 96.64%                     | 94.27%                      |
| CC31N  | Normal      | 932513           | 6560757     | 87.61%                 | 275.32               | 99.07%                    | 98.28%                     | 97.52%                     | 96.52%                     | 95.61%                     | 94.78%                     | 92.03%                      |
| CC31P  | Tumor       | 932513           | 12431714    | 85.84%                 | 451.28               | 99.18%                    | 98.58%                     | 98.20%                     | 97.88%                     | 97.49%                     | 96.91%                     | 94.40%                      |
| CC33N  | Normal      | 932513           | 6679291     | 85.45%                 | 202.8                | 99.01%                    | 98.27%                     | 97.36%                     | 96.10%                     | 95.07%                     | 94.32%                     | 88.78%                      |
| CC33P  | Tumor       | 932513           | 10745606    | 85.65%                 | 375.8                | 99.08%                    | 98.45%                     | 97.97%                     | 97.51%                     | 96.82%                     | 96.15%                     | 93.66%                      |
| CC34N  | Normal      | 932513           | 5882022     | 87.91%                 | 265.32               | 98.96%                    | 98.08%                     | 97.34%                     | 96.54%                     | 95.65%                     | 94.69%                     | 91.85%                      |
| CC34P  | Tumor       | 932513           | 14481023    | 85.29%                 | 579.15               | 99.09%                    | 98.51%                     | 98.05%                     | 97.67%                     | 97.25%                     | 96.83%                     | 94.97%                      |
| CC35N  | Normal      | 932513           | 13616814    | 85.55%                 | 540.03               | 99.12%                    | 98.56%                     | 98.09%                     | 97.75%                     | 97.46%                     | 97.10%                     | 95.02%                      |
| CC35P  | Tumor       | 932513           | 11479155    | 85.96%                 | 471.65               | 99.01%                    | 98.44%                     | 97.88%                     | 97.49%                     | 97.09%                     | 96.65%                     | 94.31%                      |
