# Supplementary material
Source: PubMed Central journal article supplement (PMC5708127)
Supplement: NIHMS894348-supplement-Supp_TableS3.pdf [file NIHMS894348-supplement-Supp_TableS3.pdf]

Supplementary Table S3. Somatic mutations identified in endometrial clear cell carcinomas by targeted massively parallel sequencing

Table with columns: Sample ID, Gene, Chromosome, Position, AA, Effect, Hotspot, Loss of Heterozygosity, Reference Allele, Alternative Allele, Tumor MAF, Normal MAF, Tumor Depth, Normal Depth, Cancer Cell Fraction (ABSOUL), Somatic Probability, 95% Confidence Interval Low, Clonality, Pathogenicity, Mutation Taster, FATHMM, CHASM (Utrons), Cancer Gene, Kanodoth, Lawrence. The table lists 1000 samples and their associated genomic mutations.

| CCDS | ALOX12B  | 17 | 797679    | p.Gly684Asp  | missense_variant   | C | T | 14.37% | 0.00% | 348 | 121 | 0.99 | 0.8994 | 0.7274 | Clonal    | Passenger         | D | PASSSENGER/OTHER | Passenger | TRUE | TRUE | TRUE |
|------|----------|----|-----------|--------------|--------------------|---|---|--------|-------|-----|-----|------|--------|--------|-----------|-------------------|---|------------------|-----------|------|------|------|
| CCDS | ALOX12B  | 17 | 797680    | p.Asp743Asp  | missense_variant   | C | A | 14.34% | 0.00% | 569 | 165 | 0.99 | 0.9122 | 0.7688 | Clonal    | Passenger         | N | PASSSENGER/OTHER | Passenger | TRUE | TRUE | TRUE |
| CCDS | AMER1    | X  | 6347003   | p.Asp133Asp  | missense_variant   | C | T | 15.63% | 0.80% | 399 | 125 | 1.00 | 0.9310 | 0.7371 | Clonal    | Passenger         | N | PASSSENGER/OTHER | Passenger | TRUE | TRUE | TRUE |
| CCDS | AMER1    | X  | 6347012   | p.Glu181Val  | missense_variant   | C | T | 12.72% | 0.00% | 383 | 164 | 0.87 | 0.7835 | 0.6809 | Clonal    | Passenger         | D | PASSSENGER/OTHER | Passenger | TRUE | TRUE | TRUE |
| CCDS | APC      | 5  | 11214560  | p.Asp45Val   | missense_variant   | C | T | 15.76% | 0.00% | 368 | 297 | 1.00 | 0.9361 | 0.7670 | Clonal    | Passenger         | D | PASSSENGER/OTHER | Passenger | TRUE | TRUE | TRUE |
| CCDS | APC      | 5  | 11217173  | p.Pro61Cys   | missense_variant   | C | T | 14.20% | 0.00% | 331 | 207 | 0.98 | 0.8769 | 0.7143 | Clonal    | Likely Pathogenic | D | CANCER           | Passenger | TRUE | TRUE | TRUE |
| CCDS | APC      | 5  | 11217677  | p.Ser212Gln  | missense_variant   | C | T | 14.42% | 0.00% | 384 | 213 | 0.99 | 0.8987 | 0.7220 | Clonal    | Likely Pathogenic | D | CANCER           | Passenger | TRUE | TRUE | TRUE |
| CCDS | AR       | X  | 6675210   | p.Ser74His   | missense_variant   | G | T | 6.74%  | 0.00% | 178 | 66  | 0.96 | 0.6232 | 0.2844 | Subclonal | Passenger         | N | PASSSENGER/OTHER | Passenger | TRUE | TRUE | TRUE |
| CCDS | AR       | X  | 6675744   | p.Asp52Gln   | missense_variant   | G | A | 13.07% | 0.00% | 523 | 311 | 0.99 | 0.8564 | 0.6911 | Clonal    | Passenger         | D | PASSSENGER/OTHER | Passenger | TRUE | TRUE | TRUE |
| CCDS | ARAF     | X  | 47430740  | p.Arg75Gln   | missense_variant   | G | A | 13.07% | 0.00% | 528 | 161 | 0.90 | 0.8184 | 0.7072 | Clonal    | Likely Pathogenic | D | CANCER           | Passenger | TRUE | TRUE | TRUE |
| CCDS | ARHGAP26 | 5  | 14228144  | p.Glu213Gln  | missense_variant   | G | A | 12.89% | 0.00% | 357 | 209 | 0.89 | 0.8043 | 0.6998 | Clonal    | Passenger         | D | PASSSENGER/OTHER | Passenger | TRUE | TRUE | TRUE |
| CCDS | ARHGAP26 | 5  | 14228202  | p.Asp21Asp   | synonymous_variant | G | A | 12.79% | 0.00% | 349 | 201 | 0.97 | 0.8699 | 0.6772 | Clonal    | Passenger         | D | PASSSENGER/OTHER | Passenger | TRUE | TRUE | TRUE |
| CCDS | ARID1A   | 1  | 27100888  | p.Ser130Ser  | synonymous_variant | C | T | 4.09%  | 0.00% | 391 | 128 | 0.28 | 0.0000 | 0.1701 | Subclonal | Passenger         | D | PASSSENGER/OTHER | Passenger | TRUE | TRUE | TRUE |
| CCDS | ARID1A   | 1  | 27109236  | p.Arg218Cys  | missense_variant   | C | T | 10.84% | 0.00% | 369 | 119 | 0.74 | 0.3762 | 0.5487 | Subclonal | Passenger         | D | PASSSENGER/OTHER | Passenger | TRUE | TRUE | TRUE |
| CCDS | ARID1B   | 6  | 15752445  | p.Pro193Leu  | missense_variant   | C | T | 17.00% | 0.00% | 421 | 121 | 1.00 | 0.9398 | 0.8198 | Clonal    | Passenger         | D | PASSSENGER/OTHER | Passenger | TRUE | TRUE | TRUE |
| CCDS | ARID1B   | 6  | 15752872  | p.Ile209Ile  | synonymous_variant | C | A | 13.88% | 0.00% | 351 | 176 | 0.94 | 0.8668 | 0.6871 | Clonal    | Passenger         | D | PASSSENGER/OTHER | Passenger | TRUE | TRUE | TRUE |
| CCDS | ARID2    | 12 | 4802527   | p.Ile12Met   | missense_variant   | C | G | 14.22% | 0.00% | 206 | 176 | 0.98 | 0.8895 | 0.6816 | Clonal    | Passenger         | D | PASSSENGER/OTHER | Passenger | TRUE | TRUE | TRUE |
| CCDS | ARID2    | 12 | 4802449   | p.Val130Val  | synonymous_variant | C | T | 9.89%  | 0.00% | 491 | 200 | 0.99 | 0.9243 | 0.8045 | Clonal    | Passenger         | D | PASSSENGER/OTHER | Passenger | TRUE | TRUE | TRUE |
| CCDS | ASXL1    | 20 | 31020716  | p.Arg338Gln  | missense_variant   | G | A | 15.54% | 0.00% | 341 | 209 | 1.00 | 0.9258 | 0.7708 | Clonal    | Passenger         | D | PASSSENGER/OTHER | Passenger | TRUE | TRUE | TRUE |
| CCDS | ATM      | 11 | 108108963 | p.Arg417Gln  | missense_variant   | C | T | 16.60% | 0.00% | 504 | 432 | 1.00 | 0.9540 | 0.8209 | Clonal    | Likely Pathogenic | D | CANCER           | Passenger | TRUE | TRUE | TRUE |
| CCDS | ATM      | 11 | 108109707 | p.Asp417Asp  | missense_variant   | C | T | 11.61% | 0.00% | 349 | 209 | 0.81 | 0.6253 | 0.6074 | Clonal    | Likely Pathogenic | D | CANCER           | Passenger | TRUE | TRUE | TRUE |
| CCDS | ATM      | 11 | 108113792 | p.Ser584Phe  | missense_variant   | C | T | 14.16% | 0.00% | 438 | 275 | 0.97 | 0.8990 | 0.7432 | Clonal    | Passenger         | N | CANCER           | Passenger | TRUE | TRUE | TRUE |
| CCDS | ATM      | 11 | 10812624  | p.Arg592Trp  | missense_variant   | C | T | 14.83% | 0.26% | 317 | 216 | 0.95 | 0.9169 | 0.7353 | Clonal    | Likely Pathogenic | D | CANCER           | Passenger | TRUE | TRUE | TRUE |
| CCDS | ATM      | 11 | 108201008 | p.Arg2459Gln | missense_variant   | C | T | 13.31% | 0.00% | 325 | 255 | 0.92 | 0.8440 | 0.6722 | Clonal    | Likely Pathogenic | D | CANCER           | Passenger | TRUE | TRUE | TRUE |
| CCDS | ATM      | 11 | 108203443 | p.Arg2598Gln | missense_variant   | A | C | 13.42% | 0.00% | 231 | 194 | 0.93 | 0.8431 | 0.6379 | Clonal    | Likely Pathogenic | D | CANCER           | Passenger | TRUE | TRUE | TRUE |
| CCDS | ATR      | X  | 14223599  | p.Asp133Cys  | missense_variant   | G | A | 19.75% | 0.00% | 324 | 250 | 1.00 | 0.9329 | 0.8651 | Clonal    | Likely Pathogenic | D | CANCER           | Passenger | TRUE | TRUE | TRUE |
| CCDS | ATR      | X  | 14227251  | p.Arg202Cys  | missense_variant   | G | G | 10.67% | 0.00% | 319 | 197 | 0.75 | 0.4706 | 0.5435 | Subclonal | Passenger         | D | PASSSENGER/OTHER | Passenger | TRUE | TRUE | TRUE |
| CCDS | ATRX     | X  | 76813003  | p.Arg220Asp  | missense_variant   | T | G | 17.04% | 0.00% | 399 | 271 | 1.00 | 0.9478 | 0.8335 | Clonal    | Passenger         | D | PASSSENGER/OTHER | Passenger | TRUE | TRUE | TRUE |
| CCDS | ATRX     | X  | 76814228  | p.Ser213Met  | missense_variant   | G | T | 16.41% | 0.00% | 463 | 292 | 0.93 | 0.9253 | 0.8162 | Clonal    | Likely Pathogenic | D | CANCER           | Passenger | TRUE | TRUE | TRUE |
| CCDS | ATRX     | X  | 76817189  | p.Pro162Leu  | missense_variant   | G | A | 12.49% | 0.00% | 448 | 259 | 0.98 | 0.9068 | 0.7526 | Clonal    | Passenger         | D | PASSSENGER/OTHER | Passenger | TRUE | TRUE | TRUE |
| CCDS | ATRX     | X  | 76807661  | p.Arg150Asp  | missense_variant   | A | C | 11.52% | 0.00% | 512 | 284 | 0.79 | 0.4708 | 0.6167 | Clonal    | Passenger         | D | PASSSENGER/OTHER | Passenger | TRUE | TRUE | TRUE |
| CCDS | ATRX     | X  | 76807223  | p.Asp141Trp  | missense_variant   | G | A | 12.89% | 0.00% | 414 | 244 | 0.91 | 0.8174 | 0.6811 | Clonal    | Passenger         | D | PASSSENGER/OTHER | Passenger | TRUE | TRUE | TRUE |
| CCDS | ATRX     | X  | 76838530  | p.Glu74P     | stop_gained        | C | A | 12.84% | 0.00% | 287 | 175 | 0.86 | 0.7724 | 0.6188 | Clonal    | Likely Pathogenic | A | CANCER           | Passenger | TRUE | TRUE | TRUE |
| CCDS | ATRX     | X  | 76838816  | p.Val84Val   | synonymous_variant | A | C | 12.20% | 0.00% | 338 | 297 | 0.84 | 0.7195 | 0.6171 | Clonal    | Passenger         | N | PASSSENGER/OTHER | Passenger | TRUE | TRUE | TRUE |
| CCDS | ATRX     | X  | 76839248  | p.Asp65Met   | missense_variant   | A | C | 12.20% | 0.00% | 338 | 297 | 0.84 | 0.7195 | 0.6171 | Clonal    | Passenger         | N | PASSSENGER/OTHER | Passenger | TRUE | TRUE | TRUE |
| CCDS | ATRX     | X  | 76840067  | p.Gly227Gly  | synonymous_variant | T | C | 11.06% | 0.00% | 189 | 127 | 0.76 | 0.6032 | 0.5012 | Clonal    | Passenger         | N | PASSSENGER/OTHER | Passenger | TRUE | TRUE | TRUE |
| CCDS | ATRX     | X  | 76853080  | p.Arg73Gln   | missense_variant   | C | T | 15.72% | 0.00% | 407 | 269 | 1.00 | 0.9393 | 0.7971 | Clonal    | Passenger         | D | PASSSENGER/OTHER | Passenger | TRUE | TRUE | TRUE |
| CCDS | ATRX     | X  | 76853080  | p.Arg73Leu   | missense_variant   | C | T | 15.72% | 0.00% | 407 | 269 | 1.00 | 0.9393 | 0.7971 | Clonal    | Passenger         | D | PASSSENGER/OTHER | Passenger | TRUE | TRUE | TRUE |
| CCDS | BAP1     | 3  | 52437189  | p.Glu25Asp   | missense_variant   | A | C | 15.22% | 0.00% | 381 | 135 | 1.00 | 0.9278 | 0.7720 | Clonal    | Passenger         | D | PASSSENGER/OTHER | Passenger | TRUE | TRUE | TRUE |
| CCDS | BAP1     | 3  | 52440379  | p.Asp222Asp  | missense_variant   | C | T | 18.25% | 0.00% | 274 | 121 | 1.00 | 0.9324 | 0.8002 | Clonal    | Passenger         | D | PASSSENGER/OTHER | Passenger | TRUE | TRUE | TRUE |
| CCDS | BAP1     | 3  | 52443767  | p.Asp21Trp   | missense_variant   | A | T | 15.29% | 0.00% | 457 | 186 | 0.94 | 0.8629 | 0.6838 | Clonal    | Passenger         | D | PASSSENGER/OTHER | Passenger | TRUE | TRUE | TRUE |
| CCDS | BCL2L1   | 20 | 30030976  | p.Ala81Val   | missense_variant   | G | A | 11.89% | 0.00% | 295 | 123 | 0.82 | 0.6787 | 0.5887 | Clonal    | Passenger         | D | PASSSENGER/OTHER | Passenger | TRUE | TRUE | TRUE |
| CCDS | BCL2L1   | 20 | 31107063  | p.Arg153Trp  | missense_variant   | T | C | 9.20%  | 0.54% | 320 | 186 | 0.63 | 0.3747 | 0.4436 | Subclonal | Passenger         | D | PASSSENGER/OTHER | Passenger | TRUE | TRUE | TRUE |
| CCDS | BCOR     | X  | 39114443  | p.Pro126Cys  | missense_variant   | G | A | 17.75% | 0.00% | 400 | 221 | 1.00 | 0.9419 | 0.8099 | Clonal    | Passenger         | D | PASSSENGER/OTHER | Passenger | TRUE | TRUE | TRUE |
| CCDS | BCOR     | X  | 39113563  | p.Arg158Gln  | missense_variant   | G | A | 18.80% | 0.00% | 468 | 234 | 1.00 | 0.8651 | 0.6848 | Clonal    | Likely Pathogenic | D | CANCER           | Passenger | TRUE | TRUE | TRUE |
| CCDS | BCOR     | X  | 39922203  | p.Trp130Trp  | synonymous_variant | G | A | 4.83%  | 0.00% | 352 | 123 | 0.73 | 0.3000 | 0.2049 | Subclonal | Passenger         | D | PASSSENGER/OTHER | Passenger | TRUE | TRUE | TRUE |
| CCDS | BCOR     | X  | 39924292  | p.Ser17Trp   | missense_variant   | G | A | 18.19% | 0.00% | 416 | 237 | 0.99 | 0.8840 | 0.7698 | Clonal    | Passenger         | D | PASSSENGER/OTHER | Passenger | TRUE | TRUE | TRUE |
| CCDS | BCOR     | X  | 39934335  | p.Ile8Ile    | synonymous_variant | G | A | 10.64% | 0.73% | 451 | 137 | 0.73 | 0.3218 | 0.5631 | Subclonal | Passenger         | D | PASSSENGER/OTHER | Passenger | TRUE | TRUE | TRUE |
| CCDS | BCOR     | X  | 39934448  | p.Ala86Val   | missense_variant   | A | C | 13.86% | 0.00% | 267 | 190 | 0.95 | 0.8676 | 0.6735 | Clonal    | Passenger         | D | PASSSENGER/OTHER | Passenger | TRUE | TRUE | TRUE |
| CCDS | BRCA1    | 17 | 11877871  | p.Asp182Trp  | missense_variant   | G | A | 18.61% | 0.00% | 335 | 169 | 0.91 | 0.8472 | 0.6723 | Clonal    | Likely Pathogenic | D | CANCER           | Passenger | TRUE | TRUE | TRUE |
| CCDS | BRCA2    | 13 | 32910880  | p.Glu79P     | stop_gained        | G | T | 14.81% | 0.00% | 378 | 237 | 1.00 | 0.9173 | 0.7633 | Clonal    | Likely Pathogenic | A | CANCER           | Passenger | TRUE | TRUE | TRUE |
| CCDS | BRCA2    | 13 | 32912524  | p.Trp153Met  | missense_variant   | G | A | 12.89% | 0.00% | 424 | 262 | 0.99 | 0.9264 | 0.7867 | Clonal    | Passenger         | D | PASSSENGER/OTHER | Passenger | TRUE | TRUE | TRUE |
| CCDS | BRCA2    | 13 | 32915000  | p.Val219Gln  | missense_variant   | G | A | 12.80% | 0.00% | 456 | 270 | 0.87 | 0.7530 | 0.6749 | Clonal    | Passenger         | N | CANCER           | Passenger | TRUE | TRUE | TRUE |
| CCDS | BRCA2    | 13 | 32972375  | p.Arg239Gln  | missense_variant   | G | A | 13.80% | 0.56% | 297 | 182 | 0.95 | 0.8688 | 0.6840 | Clonal    | Passenger         | N | PASSSENGER/OTHER | Passenger | TRUE | TRUE | TRUE |
| CCDS | CARD11   | 10 | 26655004  | p.Arg293Gln  | missense_variant   | G | A | 17.33% | 0.00% | 324 | 250 | 1.00 | 0.9329 | 0.8059 | Clonal    | Likely Pathogenic | D | CANCER           | Passenger | TRUE | TRUE | TRUE |
| CCDS | CARD11   | 10 | 2924121   | p.Ser129Gln  | missense_variant   | G | C | 20.00% | 0.00% | 420 | 150 | 1.00 | 0.9508 | 0.8936 | Clonal    | Passenger         | N | PASSSENGER/OTHER | Passenger | TRUE | TRUE | TRUE |
| CCDS | CBL      | 11 | 119144579 | p.Trp198Asp  | missense_variant   | A | G | 14.21% | 0.00% | 183 | 164 | 0.98 | 0.8660 | 0.6883 | Clonal    | Likely Pathogenic | D | CANCER           | Passenger | TRUE | TRUE | TRUE |
| CCDS | CBLB     | 3  | 10542095  | p.Asp41Asp   | synonymous_variant | G | A | 16.27% | 0.00% | 401 | 210 | 0.99 | 0.8593 | 0.6868 | Clonal    | Passenger         | N | PASSSENGER/OTHER | Passenger | TRUE | TRUE | TRUE |
| CCDS | CBLB     | 3  | 10543032  | p.Ile42Cys   | missense_variant   | G | A | 10.41% | 0.00% | 394 | 277 | 0.72 | 0.2360 | 0.5301 | Subclonal | Passenger         | D | PASSSENGER/OTHER | Passenger | TRUE | TRUE | TRUE |
| CCDS | CND3     | 6  | 41908228  | p.Arg49Gln   | missense_variant   | C | T | 13.49% | 0.00% | 482 | 174 | 0.93 | 0.8604 | 0.7207 | Clonal    | Passenger         | D | PASSSENGER/OTHER | Passenger | TRUE | TRUE | TRUE |
| CCDS | CDC73    | 1  | 193119484 | p.Val219Gln  | missense_variant   | T | C | 4.89%  | 0.00% | 434 | 184 | 0.99 | 0.9262 | 0.8192 | Clonal    | Passenger         | D | PASSSENGER/OTHER | Passenger | TRUE | TRUE | TRUE |
| CCDS | CDH1     | 16 | 6884234   | p.Val132Asp  | missense_variant   | T | C | 16.87% | 0.00% | 243 | 131 | 1.00 | 0.9319 | 0.8099 | Clonal    | Passenger         | N | PASSSENGER/OTHER | Passenger | TRUE | TRUE | TRUE |
| CCDS | CDK2     | 17 | 37657955  | p.Arg82Trp   | missense_variant   | C | T | 17.38% | 0.00% | 262 | 149 | 1.00 | 0.9389 | 0.8292 | Clonal    | Likely Pathogenic | D | PASSSENGER/OTHER | Passenger | TRUE | TRUE | TRUE |
| CCDS | CDK2     | 17 | 37652446  | p.Ile131Ile  | synonymous_variant | C | T | 16.85% | 0.00% | 404 | 221 | 1.00 | 0.9143 | 0.6778 | Clonal    | Passenger         | N | CANCER           | Passenger | TRUE | TRUE | TRUE |
| CCDS | CDK6     | 7  | 92349885  | p.Phe164Phe  | synonymous_variant | G | A | 16.79% | 0.42% | 405 | 239 | 1.00 | 0.9481 | 0.8287 | Clonal    | Passenger         | D | PASSSENGER/OTHER | Passenger | TRUE | TRUE | TRUE |
| CCDS | CDK8     | 13 | 26911717  | p.Asp41Trp   | missense_variant   | C | T | 12.60% | 0.00% | 373 | 269 | 0.87 | 0.7698 | 0.6492 | Clonal    | Passenger         | D | PASS             |           |      |      |      |

| CC26 | IC2F1  | 7  | 50688187 | p.Cys644Cys  | synonymous_variant | C                                                                                                                                                                                                                                                        | T                                                                                                                                                                                                                                                        | 16.36%                                                                                                                                                                                                                | 0.00%                                                                                                                                                                                                     | 483 | 227 | 1.00 | 0.9512                                                                                                                                                      | 0.8347 | Clonal    | Passenger         | D | CANCER           | Passenger | TRUE | TRUE | TRUE |
|------|--------|----|----------|--------------|--------------------|----------------------------------------------------------------------------------------------------------------------------------------------------------------------------------------------------------------------------------------------------------|----------------------------------------------------------------------------------------------------------------------------------------------------------------------------------------------------------------------------------------------------------|-----------------------------------------------------------------------------------------------------------------------------------------------------------------------------------------------------------------------|-----------------------------------------------------------------------------------------------------------------------------------------------------------------------------------------------------------|-----|-----|------|-------------------------------------------------------------------------------------------------------------------------------------------------------------|--------|-----------|-------------------|---|------------------|-----------|------|------|------|
| CC26 | INPFA  | 2  | 99189373 | p.Leu877Ile  | missense_variant   | C                                                                                                                                                                                                                                                        | A                                                                                                                                                                                                                                                        | 4.86%                                                                                                                                                                                                                 | 0.00%                                                                                                                                                                                                     | 482 | 186 | 0.31 | 0.0000                                                                                                                                                      | 0.2038 | Subclonal | Passenger         | D | PASSSENGER/OTHER | Passenger | TRUE | TRUE | TRUE |
| CC26 | INSR   | 19 | 7117112  | p.Lys1388Asn | missense_variant   | C                                                                                                                                                                                                                                                        | A                                                                                                                                                                                                                                                        | 14.67%                                                                                                                                                                                                                | 0.00%                                                                                                                                                                                                     | 461 | 149 | 1.00 | 0.9290                                                                                                                                                      | 0.7830 | Clonal    | Likely Pathogenic | D | CANCER           | Passenger | TRUE | TRUE | TRUE |
| CC26 | INSR   | 19 | 7117241  | p.Gln434Glu  | missense_variant   | C                                                                                                                                                                                                                                                        | A                                                                                                                                                                                                                                                        | 4.48%                                                                                                                                                                                                                 | 0.00%                                                                                                                                                                                                     | 393 | 243 | 0.00 | 0.0000                                                                                                                                                      | 0.2038 | Subclonal | Passenger         | D | CANCER           | Passenger | TRUE | TRUE | TRUE |
| CC26 | IRF4   | 6  | 393179   | p.Gly592Gly  | synonymous_variant | C                                                                                                                                                                                                                                                        | T                                                                                                                                                                                                                                                        | 13.22%                                                                                                                                                                                                                | 0.00%                                                                                                                                                                                                     | 174 | 48  | 0.91 | 0.8242                                                                                                                                                      | 0.5820 | Clonal    | Passenger         | D | CANCER           | Passenger | TRUE | TRUE | TRUE |
| CC26 | IRF4   | 6  | 4026028  | p.Asn370Thr  | missense_variant   | C                                                                                                                                                                                                                                                        | A                                                                                                                                                                                                                                                        | 12.66%                                                                                                                                                                                                                | 0.00%                                                                                                                                                                                                     | 474 | 227 | 0.87 | 0.7651                                                                                                                                                      | 0.6748 | Clonal    | Passenger         | N | PASSSENGER/OTHER | Passenger | TRUE | TRUE | TRUE |
| CC26 | IR51   | 2  | 22769914 | p.Asn174Ile  | missense_variant   | C                                                                                                                                                                                                                                                        | A                                                                                                                                                                                                                                                        | 4.40%                                                                                                                                                                                                                 | 0.00%                                                                                                                                                                                                     | 470 | 192 | 0.00 | 0.0000                                                                                                                                                      | 0.1423 | Subclonal | Passenger         | D | CANCER           | Passenger | TRUE | TRUE | TRUE |
| CC26 | IR51   | 2  | 22769930 | p.Asn202Val  | missense_variant   | G                                                                                                                                                                                                                                                        | A                                                                                                                                                                                                                                                        | 12.28%                                                                                                                                                                                                                | 0.61%                                                                                                                                                                                                     | 501 | 165 | 0.85 | 0.7134                                                                                                                                                      | 0.6849 | Clonal    | Passenger         | D | PASSSENGER/OTHER | Passenger | TRUE | TRUE | TRUE |
| CC26 | IR51   | 2  | 22769933 | p.Trp184Ile  | stop_gained        | C                                                                                                                                                                                                                                                        | T                                                                                                                                                                                                                                                        | 10.74% <th>0.00%<th>477</th><th>101</th><th>0.07</th><th>0.0060<td>0.6227</td><td>Clonal</td><td>Passenger</td><td>D</td><td>PASSSENGER/OTHER</td><td>Passenger</td><td>TRUE</td><td>TRUE</td><td>TRUE</td></th></th> | 0.00% <th>477</th> <th>101</th> <th>0.07</th> <th>0.0060<td>0.6227</td><td>Clonal</td><td>Passenger</td><td>D</td><td>PASSSENGER/OTHER</td><td>Passenger</td><td>TRUE</td><td>TRUE</td><td>TRUE</td></th> | 477 | 101 | 0.07 | 0.0060 <td>0.6227</td> <td>Clonal</td> <td>Passenger</td> <td>D</td> <td>PASSSENGER/OTHER</td> <td>Passenger</td> <td>TRUE</td> <td>TRUE</td> <td>TRUE</td> | 0.6227 | Clonal    | Passenger         | D | PASSSENGER/OTHER | Passenger | TRUE | TRUE | TRUE |
| CC26 | IR52   | 13 | 11043632 | p.Asp1225Asn | missense_variant   | C                                                                                                                                                                                                                                                        | T <td>12.85%</td> <td>0.00%</td> <td>166</td> <td>70</td> <td>0.87</td> <td>0.7847</td> <td>0.6575</td> <td>Clonal</td> <td>Passenger</td> <td>N</td> <td>PASSSENGER/OTHER</td> <td>Passenger</td> <td>TRUE</td> <td>TRUE</td> <td>TRUE</td>             | 12.85%                                                                                                                                                                                                                | 0.00%                                                                                                                                                                                                     | 166 | 70  | 0.87 | 0.7847                                                                                                                                                      | 0.6575 | Clonal    | Passenger         | N | PASSSENGER/OTHER | Passenger | TRUE | TRUE | TRUE |
| CC26 | IR52   | 13 | 11043649 | p.Leu1225Gln | missense_variant   | C                                                                                                                                                                                                                                                        | T <td>17.00%</td> <td>0.00%</td> <td>190</td> <td>29</td> <td>1.00</td> <td>0.8902</td> <td>0.6948</td> <td>Clonal</td> <td>Likely Pathogenic</td> <td>D</td> <td>CANCER</td> <td>Passenger</td> <td>TRUE</td> <td>TRUE</td> <td>TRUE</td>               | 17.00%                                                                                                                                                                                                                | 0.00%                                                                                                                                                                                                     | 190 | 29  | 1.00 | 0.8902                                                                                                                                                      | 0.6948 | Clonal    | Likely Pathogenic | D | CANCER           | Passenger | TRUE | TRUE | TRUE |
| CC26 | IR52   | 13 | 11043650 | p.Leu1225Gln | missense_variant   | C                                                                                                                                                                                                                                                        | T <td>10.17%</td> <td>0.00%</td> <td>452</td> <td>308</td> <td>0.79</td> <td>0.0060</td> <td>0.5207</td> <td>Clonal</td> <td>Passenger</td> <td>D</td> <td>PASSSENGER/OTHER</td> <td>Passenger</td> <td>TRUE</td> <td>TRUE</td> <td>TRUE</td>            | 10.17%                                                                                                                                                                                                                | 0.00%                                                                                                                                                                                                     | 452 | 308 | 0.79 | 0.0060                                                                                                                                                      | 0.5207 | Clonal    | Passenger         | D | PASSSENGER/OTHER | Passenger | TRUE | TRUE | TRUE |
| CC26 | KDR    | 4  | 5595209  | p.Trp1152Thr | synonymous_variant | C                                                                                                                                                                                                                                                        | T <td>12.46%</td> <td>0.00%</td> <td>305</td> <td>171</td> <td>0.86</td> <td>0.7607</td> <td>0.6210</td> <td>Clonal</td> <td>Passenger</td> <td>D</td> <td>CANCER</td> <td>Passenger</td> <td>TRUE</td> <td>TRUE</td> <td>TRUE</td>                      | 12.46%                                                                                                                                                                                                                | 0.00%                                                                                                                                                                                                     | 305 | 171 | 0.86 | 0.7607                                                                                                                                                      | 0.6210 | Clonal    | Passenger         | D | CANCER           | Passenger | TRUE | TRUE | TRUE |
| CC26 | KDR    | 4  | 5595243  | p.Lys887Asn  | missense_variant   | C                                                                                                                                                                                                                                                        | A <td>16.89%</td> <td>0.00%</td> <td>223</td> <td>161</td> <td>1.00</td> <td>0.9261</td> <td>0.7922</td> <td>Clonal</td> <td>Likely Pathogenic</td> <td>D</td> <td>CANCER</td> <td>Driver</td> <td>TRUE</td> <td>TRUE</td> <td>TRUE</td>                 | 16.89%                                                                                                                                                                                                                | 0.00%                                                                                                                                                                                                     | 223 | 161 | 1.00 | 0.9261                                                                                                                                                      | 0.7922 | Clonal    | Likely Pathogenic | D | CANCER           | Driver    | TRUE | TRUE | TRUE |
| CC26 | KDR    | 4  | 5595249  | p.Arg838Ser  | missense_variant   | C                                                                                                                                                                                                                                                        | T <td>13.84%</td> <td>0.00%</td> <td>150</td> <td>94</td> <td>0.94</td> <td>0.8460</td> <td>0.6262</td> <td>Clonal</td> <td>Likely Pathogenic</td> <td>D</td> <td>CANCER</td> <td>Passenger</td> <td>TRUE</td> <td>TRUE</td> <td>TRUE</td>               | 13.84%                                                                                                                                                                                                                | 0.00%                                                                                                                                                                                                     | 150 | 94  | 0.94 | 0.8460                                                                                                                                                      | 0.6262 | Clonal    | Likely Pathogenic | D | CANCER           | Passenger | TRUE | TRUE | TRUE |
| CC26 | KDR    | 4  | 5597201  | p.Ala521Ala  | synonymous_variant | C                                                                                                                                                                                                                                                        | T <td>13.33%</td> <td>0.00%</td> <td>390</td> <td>198</td> <td>0.92</td> <td>0.8454</td> <td>0.6918</td> <td>Clonal</td> <td>Passenger</td> <td>D</td> <td>CANCER</td> <td>Passenger</td> <td>TRUE</td> <td>TRUE</td> <td>TRUE</td>                      | 13.33%                                                                                                                                                                                                                | 0.00%                                                                                                                                                                                                     | 390 | 198 | 0.92 | 0.8454                                                                                                                                                      | 0.6918 | Clonal    | Passenger         | D | CANCER           | Passenger | TRUE | TRUE | TRUE |
| CC26 | KDR    | 4  | 5597397  | p.Asn476Thr  | missense_variant   | C                                                                                                                                                                                                                                                        | T <td>12.41%</td> <td>0.00%</td> <td>262</td> <td>145</td> <td>0.89</td> <td>0.7582</td> <td>0.6101</td> <td>Clonal</td> <td>Passenger</td> <td>N</td> <td>CANCER</td> <td>Passenger</td> <td>TRUE</td> <td>TRUE</td> <td>TRUE</td>                      | 12.41%                                                                                                                                                                                                                | 0.00%                                                                                                                                                                                                     | 262 | 145 | 0.89 | 0.7582                                                                                                                                                      | 0.6101 | Clonal    | Passenger         | N | CANCER           | Passenger | TRUE | TRUE | TRUE |
| CC26 | KIT    | 4  | 6959462  | p.Arg376Thr  | missense_variant   | G                                                                                                                                                                                                                                                        | A <td>11.54%</td> <td>0.00%</td> <td>386</td> <td>197</td> <td>0.77</td> <td>0.8485</td> <td>0.5714</td> <td>Clonal</td> <td>Likely Pathogenic</td> <td>D</td> <td>CANCER</td> <td>Passenger</td> <td>TRUE</td> <td>TRUE</td> <td>TRUE</td>              | 11.54%                                                                                                                                                                                                                | 0.00%                                                                                                                                                                                                     | 386 | 197 | 0.77 | 0.8485                                                                                                                                                      | 0.5714 | Clonal    | Likely Pathogenic | D | CANCER           | Passenger | TRUE | TRUE | TRUE |
| CC26 | KIT    | 4  | 55575630 | p.Glu388Lys  | missense_variant   | C                                                                                                                                                                                                                                                        | A <td>8.73%</td> <td>0.00%</td> <td>438</td> <td>280</td> <td>0.60</td> <td>0.0058</td> <td>0.4416</td> <td>Subclonal</td> <td>Passenger</td> <td>D</td> <td>PASSSENGER/OTHER</td> <td>Passenger</td> <td>TRUE</td> <td>TRUE</td> <td>TRUE</td>          | 8.73%                                                                                                                                                                                                                 | 0.00%                                                                                                                                                                                                     | 438 | 280 | 0.60 | 0.0058                                                                                                                                                      | 0.4416 | Subclonal | Passenger         | D | PASSSENGER/OTHER | Passenger | TRUE | TRUE | TRUE |
| CC26 | KIT    | 4  | 55575713 | p.Lys456Asn  | missense_variant   | G                                                                                                                                                                                                                                                        | T <td>14.62%</td> <td>0.00%</td> <td>263</td> <td>138</td> <td>1.00</td> <td>0.8844</td> <td>0.6922</td> <td>Clonal</td> <td>Likely Pathogenic</td> <td>D</td> <td>CANCER</td> <td>Passenger</td> <td>TRUE</td> <td>TRUE</td> <td>TRUE</td>              | 14.62%                                                                                                                                                                                                                | 0.00%                                                                                                                                                                                                     | 263 | 138 | 1.00 | 0.8844                                                                                                                                                      | 0.6922 | Clonal    | Likely Pathogenic | D | CANCER           | Passenger | TRUE | TRUE | TRUE |
| CC26 | KMT2A  | 11 | 11633365 | p.Pro617Val  | missense_variant   | C                                                                                                                                                                                                                                                        | T <td>3.48%</td> <td>0.00%</td> <td>289</td> <td>212</td> <td>0.24</td> <td>0.0000</td> <td>0.1983</td> <td>Subclonal</td> <td>Passenger</td> <td>D</td> <td>PASSSENGER/OTHER</td> <td>Passenger</td> <td>TRUE</td> <td>TRUE</td> <td>TRUE</td>          | 3.48%                                                                                                                                                                                                                 | 0.00%                                                                                                                                                                                                     | 289 | 212 | 0.24 | 0.0000                                                                                                                                                      | 0.1983 | Subclonal | Passenger         | D | PASSSENGER/OTHER | Passenger | TRUE | TRUE | TRUE |
| CC26 | KMT2A  | 11 | 11834230 | p.Ser252Ser  | synonymous_variant | C                                                                                                                                                                                                                                                        | T <td>13.78%</td> <td>0.00%</td> <td>312</td> <td>238</td> <td>0.95</td> <td>0.8692</td> <td>0.6889</td> <td>Clonal</td> <td>Passenger</td> <td>D</td> <td>PASSSENGER/OTHER</td> <td>Passenger</td> <td>TRUE</td> <td>TRUE</td> <td>TRUE</td>            | 13.78%                                                                                                                                                                                                                | 0.00%                                                                                                                                                                                                     | 312 | 238 | 0.95 | 0.8692                                                                                                                                                      | 0.6889 | Clonal    | Passenger         | D | PASSSENGER/OTHER | Passenger | TRUE | TRUE | TRUE |
| CC26 | KMT2A  | 11 | 11834235 | p.Pro251Trp  | missense_variant   | T <th>G</th> <td>16.29%</td> <td>0.00%</td> <td>451</td> <td>245</td> <td>1.00</td> <td>0.9558</td> <td>0.8054</td> <td>Clonal</td> <td>Passenger</td> <td>D</td> <td>PASSSENGER/OTHER</td> <td>Passenger</td> <td>TRUE</td> <td>TRUE</td> <td>TRUE</td> | G                                                                                                                                                                                                                                                        | 16.29%                                                                                                                                                                                                                | 0.00%                                                                                                                                                                                                     | 451 | 245 | 1.00 | 0.9558                                                                                                                                                      | 0.8054 | Clonal    | Passenger         | D | PASSSENGER/OTHER | Passenger | TRUE | TRUE | TRUE |
| CC26 | KMT2A  | 11 | 11835250 | p.Lys1255Asn | missense_variant   | C                                                                                                                                                                                                                                                        | T <td>11.18%</td> <td>0.29%</td> <td>653</td> <td>343</td> <td>0.77</td> <td>0.2260</td> <td>0.6124</td> <td>Subclonal</td> <td>Likely Pathogenic</td> <td>D</td> <td>PASSSENGER/OTHER</td> <td>Passenger</td> <td>TRUE</td> <td>TRUE</td> <td>TRUE</td> | 11.18%                                                                                                                                                                                                                | 0.29%                                                                                                                                                                                                     | 653 | 343 | 0.77 | 0.2260                                                                                                                                                      | 0.6124 | Subclonal | Likely Pathogenic | D | PASSSENGER/OTHER | Passenger | TRUE | TRUE | TRUE |
| CC26 | KMT2A  | 11 | 11836046 | p.Asn1567Thr | missense_variant   | G                                                                                                                                                                                                                                                        | A <td>5.00%</td> <td>0.00%</td> <td>300</td> <td>170</td> <td>0.34</td> <td>0.0000</td> <td>0.2056</td> <td>Subclonal</td> <td>Likely Pathogenic</td> <td>D</td> <td>CANCER</td> <td>Passenger</td> <td>TRUE</td> <td>TRUE</td> <td>TRUE</td>            | 5.00%                                                                                                                                                                                                                 | 0.00%                                                                                                                                                                                                     | 300 | 170 | 0.34 | 0.0000                                                                                                                                                      | 0.2056 | Subclonal | Likely Pathogenic | D | CANCER           | Passenger | TRUE | TRUE | TRUE |
| CC26 | KMT2A  | 11 | 11836053 | p.Glu1615Val | missense_variant   | G                                                                                                                                                                                                                                                        | A <td>13.23%</td> <td>0.00%</td> <td>338</td> <td>215</td> <td>0.91</td> <td>0.8309</td> <td>0.6873</td> <td>Clonal</td> <td>Passenger</td> <td>D</td> <td>PASSSENGER/OTHER</td> <td>Passenger</td> <td>TRUE</td> <td>TRUE</td> <td>TRUE</td>            | 13.23%                                                                                                                                                                                                                | 0.00%                                                                                                                                                                                                     | 338 | 215 | 0.91 | 0.8309                                                                                                                                                      | 0.6873 | Clonal    | Passenger         | D | PASSSENGER/OTHER | Passenger | TRUE | TRUE | TRUE |
| CC26 | KMT2C  | 7  | 15184234 | p.Arg697Gly  | stop_gained        | G                                                                                                                                                                                                                                                        | A <td>20.10%</td> <td>0.00%</td> <td>383</td> <td>219</td> <td>1.00</td> <td>0.9512</td> <td>0.8896</td> <td>Clonal</td> <td>Passenger</td> <td>D</td> <td>PASSSENGER/OTHER</td> <td>Passenger</td> <td>TRUE</td> <td>TRUE</td> <td>TRUE</td>            | 20.10%                                                                                                                                                                                                                | 0.00%                                                                                                                                                                                                     | 383 | 219 | 1.00 | 0.9512                                                                                                                                                      | 0.8896 | Clonal    | Passenger         | D | PASSSENGER/OTHER | Passenger | TRUE | TRUE | TRUE |
| CC26 | KMT2C  | 7  | 15184609 | p.Asn430Val  | missense_variant   | C                                                                                                                                                                                                                                                        | A <td>13.85%</td> <td>0.00%</td> <td>403</td> <td>147</td> <td>0.94</td> <td>0.8687</td> <td>0.7108</td> <td>Clonal</td> <td>Passenger</td> <td>N</td> <td>PASSSENGER/OTHER</td> <td>Passenger</td> <td>TRUE</td> <td>TRUE</td> <td>TRUE</td>            | 13.85%                                                                                                                                                                                                                | 0.00%                                                                                                                                                                                                     | 403 | 147 | 0.94 | 0.8687                                                                                                                                                      | 0.7108 | Clonal    | Passenger         | N | PASSSENGER/OTHER | Passenger | TRUE | TRUE | TRUE |
| CC26 | KMT2C  | 7  | 15185027 | p.Asn430Val  | missense_variant   | C                                                                                                                                                                                                                                                        | A <td>13.85%</td> <td>0.00%</td> <td>398</td> <td>174</td> <td>0.94</td> <td>0.8687</td> <td>0.6838</td> <td>Clonal</td> <td>Passenger</td> <td>D</td> <td>PASSSENGER/OTHER</td> <td>Passenger</td> <td>TRUE</td> <td>TRUE</td> <td>TRUE</td>            | 13.85%                                                                                                                                                                                                                | 0.00%                                                                                                                                                                                                     | 398 | 174 | 0.94 | 0.8687                                                                                                                                                      | 0.6838 | Clonal    | Passenger         | D | PASSSENGER/OTHER | Passenger | TRUE | TRUE | TRUE |
| CC26 | KMT2C  | 7  | 15186837 | p.Gln314Gln  | synonymous_variant | C                                                                                                                                                                                                                                                        | T <td>12.07%</td> <td>0.00%</td> <td>290</td> <td>200</td> <td>0.83</td> <td>0.7121</td> <td>0.5849</td> <td>Clonal</td> <td>Passenger</td> <td>D</td> <td>PASSSENGER/OTHER</td> <td>Passenger</td> <td>TRUE</td> <td>TRUE</td> <td>TRUE</td>            | 12.07%                                                                                                                                                                                                                | 0.00%                                                                                                                                                                                                     | 290 | 200 | 0.83 | 0.7121                                                                                                                                                      | 0.5849 | Clonal    | Passenger         | D | PASSSENGER/OTHER | Passenger | TRUE | TRUE | TRUE |
| CC26 | KMT2D  | 12 | 48420778 | p.Arg491Trp  | missense_variant   | C                                                                                                                                                                                                                                                        | A <td>10.11%</td> <td>0.00%</td> <td>455</td> <td>185</td> <td>0.69</td> <td>0.1053</td> <td>0.5220</td> <td>Subclonal</td> <td>Passenger</td> <td>D</td> <td>PASSSENGER/OTHER</td> <td>Passenger</td> <td>TRUE</td> <td>TRUE</td> <td>TRUE</td>         | 10.11%                                                                                                                                                                                                                | 0.00%                                                                                                                                                                                                     | 455 | 185 | 0.69 | 0.1053                                                                                                                                                      | 0.5220 | Subclonal | Passenger         | D | PASSSENGER/OTHER | Passenger | TRUE | TRUE | TRUE |
| CC26 | KMT2D  | 12 | 48421028 | p.Asn491Trp  | missense_variant   | C                                                                                                                                                                                                                                                        | T <td>10.10%</td> <td>0.00%</td> <td>452</td> <td>308</td> <td>0.79</td> <td>0.0060</td> <td>0.5207</td> <td>Clonal</td> <td>Passenger</td> <td>D</td> <td>PASSSENGER/OTHER</td> <td>Passenger</td> <td>TRUE</td> <td>TRUE</td> <td>TRUE</td>            | 10.10%                                                                                                                                                                                                                | 0.00%                                                                                                                                                                                                     | 452 | 308 | 0.79 | 0.0060                                                                                                                                                      | 0.5207 | Clonal    | Passenger         | D | PASSSENGER/OTHER | Passenger | TRUE | TRUE | TRUE |
| CC26 | KMT2D  | 12 | 48425643 | p.Arg482Gln  | missense_variant   | C                                                                                                                                                                                                                                                        | T <td>14.15%</td> <td>0.00%</td> <td>318</td> <td>88</td> <td>0.97</td> <td>0.8873</td> <td>0.7076</td> <td>Clonal</td> <td>Passenger</td> <td>D</td> <td>PASSSENGER/OTHER</td> <td>Passenger</td> <td>TRUE</td> <td>TRUE</td> <td>TRUE</td>             | 14.15%                                                                                                                                                                                                                | 0.00%                                                                                                                                                                                                     | 318 | 88  | 0.97 | 0.8873                                                                                                                                                      | 0.7076 | Clonal    | Passenger         | D | PASSSENGER/OTHER | Passenger | TRUE | TRUE | TRUE |
| CC26 | LDHA   | 11 | 18424551 | p.Arg222Tyr  | missense_variant   | T <th>C</th> <td>11.06%</td> <td>0.00%</td> <td>199</td> <td>119</td> <td>0.76</td> <td>0.6332</td> <td>0.5012</td> <td>Clonal</td> <td>Passenger</td> <td>D</td> <td>PASSSENGER/OTHER</td> <td>Passenger</td> <td>TRUE</td> <td>TRUE</td> <td>TRUE</td> | C                                                                                                                                                                                                                                                        | 11.06%                                                                                                                                                                                                                | 0.00%                                                                                                                                                                                                     | 199 | 119 | 0.76 | 0.6332                                                                                                                                                      | 0.5012 | Clonal    | Passenger         | D | PASSSENGER/OTHER | Passenger | TRUE | TRUE | TRUE |
| CC26 | LMO1   | 2  | 6248504  | p.Arg165Gln  | synonymous_variant | C                                                                                                                                                                                                                                                        | T <td>11.82%</td> <td>0.00%</td> <td>407</td> <td>268</td> <td>0.80</td> <td>0.7760</td> <td>0.6070</td> <td>Clonal</td> <td>Passenger</td> <td>D</td> <td>PASSSENGER/OTHER</td> <td>Passenger</td> <td>TRUE</td> <td>TRUE</td> <td>TRUE</td>            | 11.82%                                                                                                                                                                                                                | 0.00%                                                                                                                                                                                                     | 407 | 268 | 0.80 | 0.7760                                                                                                                                                      | 0.6070 | Clonal    | Passenger         | D | PASSSENGER/OTHER | Passenger | TRUE | TRUE | TRUE |
| CC26 | MAP3K  | 7  | 77824369 | p.Pro704Leu  | missense_variant   | G                                                                                                                                                                                                                                                        | A <td>18.88%</td> <td>0.00%</td> <td>295</td> <td>143</td> <td>1.00</td> <td>0.9126</td> <td>0.8423</td> <td>Clonal</td> <td>Passenger</td> <td>D</td> <td>PASSSENGER/OTHER</td> <td>Passenger</td> <td>TRUE</td> <td>TRUE</td> <td>TRUE</td>            | 18.88%                                                                                                                                                                                                                | 0.00%                                                                                                                                                                                                     | 295 | 143 | 1.00 | 0.9126                                                                                                                                                      | 0.8423 | Clonal    | Passenger         | D | PASSSENGER/OTHER | Passenger | TRUE | TRUE | TRUE |
| CC26 | MAP3K  | 7  | 78130910 | p.Glu313Tyr  | missense_variant   | C                                                                                                                                                                                                                                                        | T <td>15.09%</td> <td>0.00%</td> <td>232</td> <td>170</td> <td>1.00</td> <td>0.9303</td> <td>0.7053</td> <td>Clonal</td> <td>Passenger</td> <td>D</td> <td>PASSSENGER/OTHER</td> <td>Passenger</td> <td>TRUE</td> <td>TRUE</td> <td>TRUE</td>            | 15.09%                                                                                                                                                                                                                | 0.00%                                                                                                                                                                                                     | 232 | 170 | 1.00 | 0.9303                                                                                                                                                      | 0.7053 | Clonal    | Passenger         | D | PASSSENGER/OTHER | Passenger | TRUE | TRUE | TRUE |
| CC26 | MAP3K  | 7  | 78130912 | p.Asn313Tyr  | missense_variant   | C                                                                                                                                                                                                                                                        | T <td>15.09%</td> <td>0.00%</td> <td>232</td> <td>170</td> <td>1.00</td> <td>0.9303</td> <td>0.7189</td> <td>Clonal</td> <td>Passenger</td> <td>D</td> <td>PASSSENGER/OTHER</td> <td>Passenger</td> <td>TRUE</td> <td>TRUE</td> <td>TRUE</td>            | 15.09%                                                                                                                                                                                                                | 0.00%                                                                                                                                                                                                     | 232 | 170 | 1.00 | 0.9303                                                                                                                                                      | 0.7189 | Clonal    | Passenger         | D | PASSSENGER/OTHER | Passenger | TRUE | TRUE | TRUE |
| CC26 | MAP3K4 | 10 | 12024475 | p.Arg316Gln  | missense_variant   | G                                                                                                                                                                                                                                                        | A <td>18.13%</td> <td>0.00%</td> <td>320</td> <td>227</td> <td>1.00</td> <td>0.9396</td> <td>0.8343</td> <td>Clonal</td> <td>Passenger</td> <td>D</td> <td>PASSSENGER/OTHER</td> <td>Passenger</td> <td>TRUE</td> <td>TRUE</td> <td>TRUE</td>            | 18.13%                                                                                                                                                                                                                | 0.00%                                                                                                                                                                                                     | 320 | 227 | 1.00 | 0.9396                                                                                                                                                      | 0.8343 | Clonal    | Passenger         | D | PASSSENGER/OTHER | Passenger | TRUE | TRUE | TRUE |
| CC26 | MAP3K1 | 5  | 56105091 | p.Arg289Gln  | missense_variant   | G                                                                                                                                                                                                                                                        | A <td>17.61%</td> <td>0.79%</td> <td>443</td> <td>254</td> <td>1.00</td> <td>0.9434</td> <td>0.8882</td> <td>Clonal</td> <td>Likely Pathogenic</td> <td>D</td> <td>CANCER</td> <td>Passenger</td> <td>TRUE</td> <td>TRUE</td> <td>TRUE</td>              | 17.61%                                                                                                                                                                                                                | 0.79%                                                                                                                                                                                                     | 443 | 254 | 1.00 | 0.9434                                                                                                                                                      | 0.8882 | Clonal    | Likely Pathogenic | D | CANCER           | Passenger | TRUE | TRUE | TRUE |
| CC26 | MAP3K1 | 5  | 56105494 | p.Ser289Gln  | missense_variant   | G                                                                                                                                                                                                                                                        | A <td>17.61%</td> <td>0.79%</td> <td>443</td> <td>254</td> <td>1.00</td> <td>0.9434</td> <td>0.8882</td> <td>Clonal</td> <td>Likely Pathogenic</td> <td>D</td> <td>CANCER</td> <td>Passenger</td> <td>TRUE</td> <td>TRUE</td> <td>TRUE</td>              | 17.61%                                                                                                                                                                                                                | 0.79%                                                                                                                                                                                                     | 443 | 254 | 1.00 | 0.9434                                                                                                                                                      | 0.8882 | Clonal    | Likely Pathogenic | D | CANCER           | Passenger | TRUE | TRUE | TRUE |
| CC26 | MAP3K6 | 10 | 30746491 | p.Ser422Leu  | missense_variant   | C                                                                                                                                                                                                                                                        | T <td>15.84%</td> <td>0.00%</td> <td>358</td> <td>194</td> <td>1.00</td> <td>0.9332</td> <td>0.7800</td> <td>Clonal</td> <td>Passenger</td> <td>D</td> <td>PASSSENGER/OTHER</td> <td>Passenger</td> <td>TRUE</td> <td>TRUE</td> <td>TRUE</td>            | 15.84%                                                                                                                                                                                                                | 0.00%                                                                                                                                                                                                     | 358 | 194 | 1.00 | 0.9332                                                                                                                                                      | 0.7800 | Clonal    | Passenger         | D | PASSSENGER/OTHER | Passenger | TRUE | TRUE | TRUE |
| CC26 | MAP3K1 | 22 | 22123563 | p.Phe331Phe  | synonymous_variant | C                                                                                                                                                                                                                                                        | A <td>14.72%</td> <td>0.48%</td> <td>428</td> <td>208</td> <td>1.00</td> <td>0.9184</td> <td>0.7681</td> <td>Clonal</td> <td>Passenger</td> <td>D</td> <td>PASSSENGER/OTHER</td> <td>Passenger</td> <td>TRUE</td> <td>TRUE</td> <td>TRUE</td>            | 14.72%                                                                                                                                                                                                                | 0.48%                                                                                                                                                                                                     | 428 | 208 | 1.00 | 0.9184                                                                                                                                                      | 0.7681 | Clonal    | Passenger         | D | PASSSENGER/OTHER | Passenger | TRUE | TRUE | TRUE |
| CC26 | MAP3K1 | 22 | 22123570 | p.Arg331Gln  | missense_variant   | C                                                                                                                                                                                                                                                        | A <td>14.78%</td> <td>0.00%</td> <td>344</td> <td>202</td> <td>1.00</td> <td>0.9200</td> <td>0.7436</td> <td>Clonal</td> <td>Passenger</td> <td>D</td> <td>PASSSENGER/OTHER</td> <td>Passenger</td> <td>TRUE</td> <td>TRUE</td> <td>TRUE</td>            | 14.78%                                                                                                                                                                                                                | 0.00%                                                                                                                                                                                                     | 344 | 202 | 1.00 | 0.9200                                                                                                                                                      | 0.7436 | Clonal    | Passenger         | D | PASSSENGER/OTHER | Passenger | TRUE | TRUE | TRUE |
| CC26 | MEI2   | X  | 70348158 | p.Ile1074Ile | synonymous_variant | C                                                                                                                                                                                                                                                        | T <td>10.10%</td> <td>0.00%</td> <td>334</td> <td>160</td> <td>0.70</td> <td>0.2576</td> <td>0.5000</td> <td>Subclonal</td> <td>Passenger</td> <td>D</td> <td>PASSSENGER/OTHER</td> <td>Passenger</td> <td>TRUE</td> <td>TRUE</td> <td>TRUE</td>         | 10.10%                                                                                                                                                                                                                | 0.00%                                                                                                                                                                                                     | 334 | 160 | 0.70 | 0.2576                                                                                                                                                      | 0.5000 | Subclonal | Passenger         | D | PASSSENGER/OTHER | Passenger | TRUE | TRUE | TRUE |
| CC26 | MEI2   | X  | 70449899 | p.Arg1264His | missense_variant   | C                                                                                                                                                                                                                                                        | A <td>15.97%</td> <td>0.00%</td> <td>357</td> <td>161</td> <td>1.00</td> <td>0.9378</td> <td>0.7884</td> <td>Clonal</td> <td>Passenger</td> <td>D</td> <td>PASSSENGER/OTHER</td> <td>Passenger</td> <td>TRUE</td> <td>TRUE</td> <td>TRUE</td>            | 15.97%                                                                                                                                                                                                                | 0.00%                                                                                                                                                                                                     | 357 | 161 | 1.00 | 0.9378                                                                                                                                                      | 0.7884 | Clonal    | Passenger         | D | PASSSENGER/OTHER | Passenger | TRUE | TRUE | TRUE |
| CC26 | MEI2   | X  | 70452290 | p.Arg626Gln  | missense_variant   | C                                                                                                                                                                                                                                                        | T <td>17.07%</td> <td>0.00%</td> <td>411</td> <td>192</td> <td>1.00</td> <td>0.8349</td> <td>0.4816</td> <td>Subclonal</td> <td>Passenger</td> <td>D</td> <td>PASSSENGER/OTHER</td> <td>Passenger</td> <td>TRUE</td> <td>TRUE</td> <td>TRUE</td>         | 17.07%                                                                                                                                                                                                                | 0.00%                                                                                                                                                                                                     | 411 | 192 | 1.00 | 0.8349                                                                                                                                                      | 0.4816 | Subclonal | Passenger         | D | PASSSENGER/OTHER | Passenger | TRUE | TRUE | TRUE |
| CC26 | MEI    | 7  | 11634214 | p.Arg359Gln  | missense_variant   | G                                                                                                                                                                                                                                                        | A <td>4.41%</td> <td>0.00%</td> <td>363</td> <td>204</td> <td>0.30</td> <td>0.0000</td> <td>0.1843</td> <td>Subclonal</td> <td>Passenger</td> <td>D</td> <td>PASSSENGER/OTHER</td> <td>Passenger</td> <td>TRUE</td> <td>TRUE</td> <td>TRUE</td>          | 4.41%                                                                                                                                                                                                                 | 0.00%                                                                                                                                                                                                     | 363 | 204 | 0.30 | 0.0000                                                                                                                                                      | 0.1843 | Subclonal | Passenger         | D | PASSSENGER/OTHER | Passenger | TRUE | TRUE | TRUE |
| CC26 | MIF    | 3  | 70014016 | p.Arg347Ile  | stop_gained        | C                                                                                                                                                                                                                                                        | T <td>14.07%</td> <td>0.00%</td> <td>263</td> <td>175</td> <td>0.97</td> <td>0.8764</td> <td>0.6810</td> <td>Clonal</td> <td>Likely Pathogenic</td> <td>D</td> <td>PASSSENGER/OTHER</td> <td>Passenger</td> <td>TRUE</td> <td>TRUE</td> <td>TRUE</td>    | 14.07%                                                                                                                                                                                                                | 0.00%                                                                                                                                                                                                     | 263 | 175 | 0.97 | 0.8764                                                                                                                                                      | 0.6810 | Clonal    | Likely Pathogenic | D | PASSSENGER/OTHER | Passenger | TRUE | TRUE | TRUE |
| CC26 | MPL    | 1  | 43812465 | p.Arg263Gln  | missense_variant   | C                                                                                                                                                                                                                                                        | A <td>7.88%</td> <td>0.00%</td> <td>369</td> <td>174</td> <td>0.94</td> <td>0.8056</td> <td>0.5793</td> <td>Subclonal</td> <td>Passenger</td> <td>D</td> <td>PASSSENGER/OTHER</td> <td>Passenger</td> <td>TRUE</td> <td>TRUE</td> <td>TRUE</td>          | 7.88%                                                                                                                                                                                                                 | 0.00%                                                                                                                                                                                                     | 369 | 174 | 0.94 | 0.8056                                                                                                                                                      | 0.5793 | Subclonal | Passenger         | D | PASSSENGER/OTHER | Passenger | TRUE | TRUE | TRUE |
| CC26 | MPL    | 1  | 43812374 | p.Arg252Gln  | missense_variant   | C                                                                                                                                                                                                                                                        | A <td>13.23%</td> <td>0.00%</td> <td>461</td> <td>254</td> <td>0.91</td> <td>0.8377</td> <td>0.7032</td> <td>Clonal</td> <td>Passenger</td> <td>D</td> <td>PASSSENGER/OTHER</td> <td>Passenger</td> <td>TRUE</td> <td>TRUE</td> <td>TRUE</td>            | 13.23%                                                                                                                                                                                                                | 0.00%                                                                                                                                                                                                     | 461 | 254 | 0.91 | 0.8377                                                                                                                                                      | 0.7032 | Clonal    | Passenger         | D | PASSSENGER/OTHER | Passenger | TRUE | TRUE | TRUE |
| CC26 | MPL    | 1  | 43818533 | p.Arg252Gln  | missense_variant   | C                                                                                                                                                                                                                                                        | A <td>16.97%</td> <td>0.00%</td> <td>458</td> <td>262</td> <td>1.00</td> <td>0.9525</td> <td>0.8457</td> <td>Clonal</td> <td>Passenger</td> <td>D</td> <td>PASSSENGER/OTHER</td> <td>Passenger</td> <td>TRUE</td> <td>TRUE</td> <td>TRUE</td>            | 16.97%                                                                                                                                                                                                                | 0.00%                                                                                                                                                                                                     | 458 | 262 | 1.00 | 0.9525                                                                                                                                                      | 0.8457 | Clonal    | Passenger         | D | PASSSENGER/OTHER | Passenger | TRUE | TRUE | TRUE |
| CC26 | MRE11A | 11 | 94203941 | p.Glu33Asp   | missense_variant   | C                                                                                                                                                                                                                                                        | A <td>13.38%</td> <td>0.00%</td> <td>299</td> <td>231</td> <td>0.92</td> <td>0.8441</td> <td>0.6848</td> <td>Clonal</td> <td>Likely Pathogenic</td> <td>D</td> <td>CANCER</td> <td>Passenger</td> <td>TRUE</td> <td>TRUE</td> <td>TRUE</td>              | 13.38%                                                                                                                                                                                                                | 0.00%                                                                                                                                                                                                     | 299 | 231 | 0.92 | 0.8441                                                                                                                                                      | 0.6848 | Clonal    | Likely Pathogenic | D | CANCER           | Passenger | TRUE | TRUE | TRUE |
| CC26 | MSH2   | 2  | 48026019 | p.Lys299Lys  | synonymous_variant | G                                                                                                                                                                                                                                                        | A <td>13.73%</td> <td>0.00%</td> <td>255</td> <td>203</td> <td>0.94</td> <td>0.8585</td> <td>0.6820</td> <td>Clonal</td> <td>Passenger</td> <td>D</td> <td>PASSSENGER/OTHER</td> <td>Passenger</td> <td>TRUE</td> <td>TRUE</td> <td>TRUE</td>            | 13.73%                                                                                                                                                                                                                | 0.00%                                                                                                                                                                                                     | 255 | 203 | 0.94 | 0.8585                                                                                                                                                      | 0.6820 | Clonal    | Passenger         | D | PASSSENGER/OTHER | Passenger | TRUE | TRUE | TRUE |
| CC26 | MSH2   | 2  | 48026020 | p.Arg299Lys  | missense_variant   | G                                                                                                                                                                                                                                                        | A <td>13.73%</td> <td>0.00%</td> <td>255</td> <td>203</td> <td>0.94</td> <td>0.8585</td> <td>0.6820</td> <td>Clonal</td> <td>Passenger</td> <td>D</td> <td>PASSSENGER/OTHER</td> <td>Passenger</td> <td>TRUE</td> <td>TRUE</td> <td>TRUE</td>            | 13.73%                                                                                                                                                                                                                | 0.00%                                                                                                                                                                                                     | 255 | 203 | 0.94 | 0.8585                                                                                                                                                      | 0.6820 | Clonal    | Passenger         | D | PASSSENGER/OTHER | Passenger | TRUE | TRUE | TRUE |
| CC26 | MSH2   | 2  | 48033396 | p.Glu334Ser  | stop_gained        | C                                                                                                                                                                                                                                                        | T <td>14.38%</td> <td>0.00%</td> <td>313</td> <td>214</td> <td>0.99</td> <td>0.8956</td> <td>0.7154</td> <td>Clonal</td> <td>Likely Pathogenic</td> <td>D</td> <td>CANCER</td> <td>Passenger</td> <td>TRUE</td> <td>TRUE</td> <td>TRUE</td>              | 14.38%                                                                                                                                                                                                                | 0.00%                                                                                                                                                                                                     | 313 | 214 | 0.99 | 0.8956                                                                                                                                                      | 0.7154 | Clonal    | Likely Pathogenic | D | CANCER           | Passenger | TRUE | TRUE | TRUE |
| CC26 | MTOR   | 1  | 11186276 | p.Asn252Asn  | synonymous_variant | C                                                                                                                                                                                                                                                        | T <td>14.86%</td> <td>0.76%</td> <td>315</td> <td>199</td> <td>1.00</td> <td>0.9306</td> <td>0.7255</td> <td>Clonal</td> <td>Passenger</td> <td>D</td> <td>PASSSENGER/OTHER</td> <td>Passenger</td> <td>TRUE</td> <td>TRUE</td> <td>TRUE</td>            | 14.86%                                                                                                                                                                                                                | 0.76%                                                                                                                                                                                                     | 315 | 199 | 1.00 | 0.9306                                                                                                                                                      | 0.7255 | Clonal    | Passenger         | D | PASSSENGER/OTHER | Passenger | TRUE | TRUE | TRUE |
| CC26 | MTOR   | 1  | 11186683 | p.Asn252Asn  | synonymous_variant | C                                                                                                                                                                                                                                                        | T <td>13.00%</td> <td>0.00%</td> <td>318</td> <td>244</td> <td>0.98</td> <td>0.8262</td> <td>0.6813</td> <td>Clonal</td> <td>Passenger</td> <td>D</td> <td>PASSSENGER/OTHER</td> <td>Passenger</td> <td>TRUE</td> <td>TRUE</td> <td>TRUE</td>            | 13.00%                                                                                                                                                                                                                | 0.00%                                                                                                                                                                                                     | 318 | 244 | 0.98 | 0.8262                                                                                                                                                      | 0.6813 | Clonal    | Passenger         | D | PASSSENGER/OTHER | Passenger | TRUE | TRUE | TRUE |
| CC26 | MTOR   | 1  | 11188825 | p.Arg195Gln  | missense_variant   | C                                                                                                                                                                                                                                                        | A <td>3.80%</td> <td>0.00%</td> <td>342</td> <td>203</td> <td>0.26</td> <td>0.0000</td> <td>0.1496</td> <td>Subclonal</td> <td>Likely Pathogenic</td> <td>D</td> <td>CANCER</td> <td>Passenger</td> <td>TRUE</td> <td>TRUE</td> <td>TRUE</td>            | 3.80%                                                                                                                                                                                                                 | 0.00%                                                                                                                                                                                                     | 342 | 203 | 0.26 | 0.0000                                                                                                                                                      | 0.1496 | Subclonal | Likely Pathogenic | D | CANCER           | Passenger | TRUE | TRUE | TRUE |
| CC26 | MTOR   | 1  | 11256651 | p.Glu1342Lys | missense_variant   | C                                                                                                                                                                                                                                                        | A <td>16.11%</td> <td>0.00%</td> <td>298</td> <td>166</td> <td>1.00</td> <td>0.9332</td> <td>0.7444</td> <td>Clonal</td> <td>Passenger</td> <td>D</td> <td>PASSSENGER/OTHER</td> <td>Passenger</td> <td>TRUE</td> <td>TRUE</td> <td>TRUE</td>            | 16.11%                                                                                                                                                                                                                | 0.00%                                                                                                                                                                                                     | 298 | 166 | 1.00 | 0.9332                                                                                                                                                      | 0.7444 | Clonal    | Passenger         | D | PASSSENGER/OTHER | Passenger | TRUE | TRUE | TRUE |
| CC26 | MTOR   | 1  | 11300388 | p.Ser1342Lys | missense_variant   | C                                                                                                                                                                                                                                                        | A <td>13.07%</td> <td>0.00%</td> <td>284</td> <td>162</td> <td>0.94</td> <td>0.8569</td> <td>0.6922</td> <td>Clonal</td> <td>Passenger</td> <td>D</td> <td>PASSSENGER/OTHER</td> <td>Passenger</td> <td>TRUE</td> <td>TRUE</td> <td>TRUE</td>            | 13.07%                                                                                                                                                                                                                | 0.00%                                                                                                                                                                                                     | 284 | 162 | 0.94 | 0.8569                                                                                                                                                      | 0.6922 | Clonal    | Passenger         | D | PASSSENGER/OTHER | Passenger | TRUE | TRUE | TRUE |
| CC26 | MYC    | 2  | 16085739 | p.Asn305Asn  | synonymous_variant | C                                                                                                                                                                                                                                                        | T <td>14.35%</td> <td>0.00%</td> <td>446</td> <td>235</td> <td>0.99</td> <td>0.9080</td> <td>0.7537</td> <td>Clonal</td> <td>Passenger</td> <td>N</td> <td>PASSSENGER/OTHER</td> <td>Passenger</td> <td>TRUE</td> <td>TRUE</td> <td>TRUE</td>            | 14.35%                                                                                                                                                                                                                | 0.00%                                                                                                                                                                                                     | 446 | 235 | 0.99 | 0.9080                                                                                                                                                      | 0.7537 | Clonal    | Passenger         | N | PASSSENGER/OTHER | Passenger | TRUE | TRUE | TRUE |
| CC26 | NBN    | 8  | 80967639 | p.Lys442Asn  | missense_variant   | C                                                                                                                                                                                                                                                        | A <td>16.67%</td> <td>0.00%</td> <td>351</td> <td>250</td> <td>1.00</td> <td>0.9335</td> <td>0.7798</td> <td>Clonal</td> <td>Passenger</td> <td>N</td> <td>PASSSENGER/OTHER</td> <td>Passenger</td> <td>TRUE</td> <td>TRUE</td> <td>TRUE</td>            | 16.67%                                                                                                                                                                                                                | 0.00%                                                                                                                                                                                                     | 351 | 250 | 1.00 | 0.9335                                                                                                                                                      | 0.7798 | Clonal    | Passenger         | N | PASSSENGER/OTHER | Passenger | TRUE | TRUE | TRUE |
| CC26 | NCOA2  | 2  | 7100002  | p.Arg165Gln  | synonymous_variant | C                                                                                                                                                                                                                                                        | T <td>11.82%</td> <td>0.00%</td> <td>417</td> <td>268</td> <td>0.80</td> <td>0.7743</td> <td>0.6018</td> <td>Clonal</td> <td>Passenger</td> <td>D</td> <td>PASSSENGER/OTHER</td> <td>Passenger</td> <td>TRUE</td> <td>TRUE</td> <td>TRUE</td>            | 11.82%                                                                                                                                                                                                                | 0.00%                                                                                                                                                                                                     | 417 | 268 | 0.80 | 0.7743                                                                                                                                                      | 0.6018 | Clonal    | Passenger         | D | PASSSENGER/OTHER | Passenger | TRUE | TRUE | TRUE |
| CC26 | NCOA2  | 2  | 7100003  | p.Arg165Gln  | missense_variant   | C                                                                                                                                                                                                                                                        | T <td>13.70%</td> <td>0.00%</td> <td>270</td> <td>141</td> <td>0.94</td> <td>0.8603</td> <td>0.6880</td> <td>Clonal</td> <td>Passenger</td> <td>D</td> <td>PASSSENGER/OTHER</td> <td>Passenger</td> <td>TRUE</td> <td>TRUE</td> <td>TRUE</td>            | 13.70%                                                                                                                                                                                                                | 0.00%                                                                                                                                                                                                     | 270 | 141 | 0.94 | 0.8603                                                                                                                                                      | 0.6880 | Clonal    | Passenger         | D | PASSSENGER/OTHER | Passenger | TRUE | TRUE | TRUE |
| CC26 | NF1    | 17 | 29533315 | p.Arg342Phe  | stop_gained        |                                                                                                                                                                                                                                                          |                                                                                                                                                                                                                                                          |                                                                                                                                                                                                                       |                                                                                                                                                                                                           |     |     |      |                                                                                                                                                             |        |           |                   |   |                  |           |      |      |      |







| CCSI | MYCN   | 2  | 16086051 | p.Pro290Phe  | synonymous_variant    | G                                                                                                                                                              | A                                                                                                                                              | 24.91% | 0.34%  | 554   | 295   | 1.0  | 0.7960 | 0.9152 | Clonal    | Passenger                                                                                         |                                                                                                      | TRUE                                                                                         | TRUE            |                 |           |      |      |
|------|--------|----|----------|--------------|-----------------------|----------------------------------------------------------------------------------------------------------------------------------------------------------------|------------------------------------------------------------------------------------------------------------------------------------------------|--------|--------|-------|-------|------|--------|--------|-----------|---------------------------------------------------------------------------------------------------|------------------------------------------------------------------------------------------------------|----------------------------------------------------------------------------------------------|-----------------|-----------------|-----------|------|------|
| CCSI | MYO8   | 3  | 38180393 | p.Ala81Ser   | missense_variant      | G                                                                                                                                                              | T                                                                                                                                              | 24.55% | 0.00%  | 660   | 440   | 1.0  | 0.8100 | 0.9220 | Clonal    | Passenger <td>N</td> <td>PASSENGER/OTHER</td> <td>Passenger</td> <td>TRUE</td> <td>TRUE</td>      | N                                                                                                    | PASSENGER/OTHER                                                                              | Passenger       | TRUE            | TRUE      |      |      |
| CCSI | MYO8   | 3  | 38182897 | p.Pro288Leu  | synonymous_variant    | C                                                                                                                                                              | T                                                                                                                                              | 20.98% | 0.00%  | 367   | 207   | 1.00 | 0.9544 | 0.8055 | Clonal    | Passenger <td></td> <td>PASSENGER/OTHER</td> <td>Passenger</td> <td>TRUE</td> <td>TRUE</td>       |                                                                                                      | PASSENGER/OTHER                                                                              | Passenger       | TRUE            | TRUE      |      |      |
| CCSI | NCOA2  | 7  | 17054403 | p.Pro277Gln  | missense_variant      | C                                                                                                                                                              | T                                                                                                                                              | 19.01% | 0.00%  | 277   | 160   | 1.00 | 0.8173 | 0.6218 | Clonal    | Passenger <td></td> <td>PASSENGER/OTHER</td> <td>Passenger</td> <td>TRUE</td> <td>TRUE</td>       |                                                                                                      | PASSENGER/OTHER                                                                              | Passenger       | TRUE            | TRUE      |      |      |
| CCSI | NCOA2  | 8  | 71068262 | p.Trp773Ile  | missense_variant      | G                                                                                                                                                              | A                                                                                                                                              | 19.54% | 0.55%  | 302   | 182   | 0.97 | 0.8416 | 0.7415 | Clonal    | Passenger <td>N</td> <td>PASSENGER/OTHER</td> <td>Passenger</td> <td>TRUE</td> <td>TRUE</td>      | N                                                                                                    | PASSENGER/OTHER                                                                              | Passenger       | TRUE            | TRUE      |      |      |
| CCSI | NF1    | 17 | 29509997 | p.Gln291Val  | missense_variant      | A                                                                                                                                                              | T                                                                                                                                              | 19.48% | 0.00%  | 267   | 178   | 0.97 | 0.8326 | 0.7262 | Clonal    | Passenger <td>D</td> <td>PASSENGER/OTHER</td> <td>Passenger</td> <td>TRUE</td> <td>TRUE</td>      | D                                                                                                    | PASSENGER/OTHER                                                                              | Passenger       | TRUE            | TRUE      |      |      |
| CCSI | NF1    | 17 | 29509673 | p.Asp292Glu  | missense_variant      | A                                                                                                                                                              | T                                                                                                                                              | 19.48% | 0.00%  | 299   | 162   | 1.00 | 0.8202 | 0.7823 | Clonal    | Passenger <td>D</td> <td>PASSENGER/OTHER</td> <td>Passenger</td> <td>TRUE</td> <td>TRUE</td>      | D                                                                                                    | PASSENGER/OTHER                                                                              | Passenger       | TRUE            | TRUE      |      |      |
| CCSI | NF1    | 17 | 29507072 | p.Ala1349Thr | missense_variant      | G                                                                                                                                                              | A                                                                                                                                              | 19.43% | 0.00%  | 350   | 273   | 0.97 | 0.8454 | 0.7543 | Clonal    | Passenger <td>D</td> <td>PASSENGER/OTHER</td> <td>Passenger</td> <td>TRUE</td> <td>TRUE</td>      | D                                                                                                    | PASSENGER/OTHER                                                                              | Passenger       | TRUE            | TRUE      |      |      |
| CCSI | NF1    | 17 | 29605074 | p.Pro242Gln  | missense_variant      | G                                                                                                                                                              | T                                                                                                                                              | 7.44%  | 0.00%  | 339   | 192   | 0.37 | 0.0000 | 0.2480 | Subclonal | Passenger <td>D</td> <td>PASSENGER/OTHER</td> <td>Passenger</td> <td>TRUE</td> <td>TRUE</td>      | D                                                                                                    | PASSENGER/OTHER                                                                              | Passenger       | TRUE            | TRUE      |      |      |
| CCSI | NF1    | 17 | 29617688 | p.Ser271Trp  | missense_variant      | G                                                                                                                                                              | A                                                                                                                                              | 25.02% | 0.00%  | 227   | 140   | 1.00 | 0.8899 | 0.8454 | Clonal    | Passenger <td>D</td> <td>PASSENGER/OTHER</td> <td>CANCER</td> <td>TRUE</td> <td>TRUE</td>         | D                                                                                                    | PASSENGER/OTHER                                                                              | CANCER          | TRUE            | TRUE      |      |      |
| CCSI | NF2    | 22 | 30047302 | p.Arg282Cys  | stop_gained           | LOH                                                                                                                                                            | C                                                                                                                                              | T      | 19.34% | 1.78% | 243   | 169  | 0.96   | 0.8212 | 0.7114    | Clonal                                                                                            | Likely Pathogenic <td>A</td> <td>PASSENGER/OTHER</td> <td>Passenger</td> <td>TRUE</td> <td>TRUE</td> | A                                                                                            | PASSENGER/OTHER | Passenger       | TRUE      | TRUE |      |
| CCSI | NF2    | 22 | 17809804 | p.Gln210Cys  | missense_variant      | TRUE                                                                                                                                                           | C                                                                                                                                              | T      | 4.92%  | 0.00% | 305   | 186  | 0.24   | 0.0000 | 0.1444    | Subclonal                                                                                         | Likely Pathogenic <td>D</td> <td>PASSENGER/OTHER</td> <td>Passenger</td> <td>TRUE</td> <td>TRUE</td> | D                                                                                            | PASSENGER/OTHER | Passenger       | TRUE      | TRUE |      |
| CCSI | NFKB1  | 4  | 19302128 | p.Trp435Asp  | synonymous_variant    | G                                                                                                                                                              | A                                                                                                                                              | 15.34% | 0.00%  | 239   | 142   | 1.00 | 0.7468 | 0.5989 | Clonal    | Passenger <td></td> <td>PASSENGER/OTHER</td> <td>Passenger</td> <td>TRUE</td> <td>TRUE</td>       |                                                                                                      | PASSENGER/OTHER                                                                              | Passenger       | TRUE            | TRUE      |      |      |
| CCSI | NFKB1  | 4  | 10353324 | p.Pro798Ser  | missense_variant      | C                                                                                                                                                              | T <td>12.85%</td> <td>0.00%</td> <td>249</td> <td>144</td> <td>0.64</td> <td>0.0372</td> <td>0.2463</td> <td>Subclonal</td> <td>Passenger</td> | 12.85% | 0.00%  | 249   | 144   | 0.64 | 0.0372 | 0.2463 | Subclonal | Passenger                                                                                         | D                                                                                                    | PASSENGER/OTHER                                                                              | Passenger       | TRUE            | TRUE      |      |      |
| CCSI | NFKB2  | 10 | 10413695 | p.Trp777Thr  | synonymous_variant    | C                                                                                                                                                              | T                                                                                                                                              | 7.05%  | 0.48%  | 454   | 209   | 0.35 | 0.0000 | 0.2459 | Subclonal | Passenger <td>D</td> <td>PASSENGER/OTHER</td> <td>Passenger</td> <td>TRUE</td> <td>TRUE</td>      | D                                                                                                    | PASSENGER/OTHER                                                                              | Passenger       | TRUE            | TRUE      |      |      |
| CCSI | NKX2-1 | 14 | 38697200 | p.Ser168Ser  | synonymous_variant    | G                                                                                                                                                              | A                                                                                                                                              | 20.96% | 0.00%  | 242   | 100   | 1.00 | 0.8731 | 0.7119 | Clonal    | Passenger <td></td> <td>PASSENGER/OTHER</td> <td>Passenger</td> <td>TRUE</td> <td>TRUE</td>       |                                                                                                      | PASSENGER/OTHER                                                                              | Passenger       | TRUE            | TRUE      |      |      |
| CCSI | NOTCH1 | 9  | 13949034 | p.Gln219Ser  | missense_variant      | G                                                                                                                                                              | A                                                                                                                                              | 9.21%  | 0.00%  | 76    | 39    | 0.46 | 0.0713 | 0.2225 | Subclonal | Passenger <td>D</td> <td>PASSENGER/OTHER</td> <td>Passenger</td> <td>TRUE</td> <td>TRUE</td>      | D                                                                                                    | PASSENGER/OTHER                                                                              | Passenger       | TRUE            | TRUE      |      |      |
| CCSI | NOTCH1 | 9  | 13950090 | p.Asp219Ser  | missense_variant      | C                                                                                                                                                              | T                                                                                                                                              | 8.74%  | 0.30%  | 232   | 136   | 0.29 | 0.0000 | 0.1981 | Subclonal | Passenger <td>D</td> <td>PASSENGER/OTHER</td> <td>Passenger</td> <td>TRUE</td> <td>TRUE</td>      | D                                                                                                    | PASSENGER/OTHER                                                                              | Passenger       | TRUE            | TRUE      |      |      |
| CCSI | NOTCH1 | 9  | 13959136 | p.Ser229Gln  | missense_variant      | G                                                                                                                                                              | T                                                                                                                                              | 18.55% | 0.00%  | 512   | 310   | 0.52 | 0.7788 | 0.7540 | Clonal    | Passenger <td>N</td> <td>PASSENGER/OTHER</td> <td>Passenger</td> <td>TRUE</td> <td>TRUE</td>      | N                                                                                                    | PASSENGER/OTHER                                                                              | Passenger       | TRUE            | TRUE      |      |      |
| CCSI | NOTCH1 | 9  | 13959229 | p.His184Tyr  | missense_variant      | G                                                                                                                                                              | A                                                                                                                                              | 0.36%  | 0.00%  | 682   | 393   | 0.32 | 0.0000 | 0.2321 | Subclonal | Passenger <td>D</td> <td>PASSENGER/OTHER</td> <td>Passenger</td> <td>TRUE</td> <td>TRUE</td>      | D                                                                                                    | PASSENGER/OTHER                                                                              | Passenger       | TRUE            | TRUE      |      |      |
| CCSI | NOTCH1 | 9  | 13959744 | p.Ser186Tyr  | missense_variant      | G                                                                                                                                                              | A                                                                                                                                              | 9.95%  | 0.38%  | 530   | 312   | 0.71 | 0.0659 | 0.5398 | Subclonal | Passenger <td>D</td> <td>PASSENGER/OTHER</td> <td>Passenger</td> <td>TRUE</td> <td>TRUE</td>      | D                                                                                                    | PASSENGER/OTHER                                                                              | Passenger       | TRUE            | TRUE      |      |      |
| CCSI | NOTCH1 | 9  | 13960120 | p.Gly1280Asp | missense_variant      | C                                                                                                                                                              | T                                                                                                                                              | 5.88%  | 0.31%  | 612   | 327   | 0.29 | 0.0000 | 0.2078 | Subclonal | Likely Pathogenic <td>D</td> <td>PASSENGER/OTHER</td> <td>Driver</td> <td>TRUE</td> <td>TRUE</td> | D                                                                                                    | PASSENGER/OTHER                                                                              | Driver          | TRUE            | TRUE      |      |      |
| CCSI | NOTCH1 | 9  | 13961334 | p.Ala343Tyr  | missense_variant      | LOH                                                                                                                                                            | G                                                                                                                                              | T      | 18.50% | 0.00% | 489   | 382  | 0.64   | 0.8128 | 0.7838    | Clonal                                                                                            | Passenger <td>D</td> <td>PASSENGER/OTHER</td> <td>Passenger</td> <td>TRUE</td> <td>TRUE</td>         | D                                                                                            | PASSENGER/OTHER | Passenger       | TRUE      | TRUE |      |
| CCSI | NOTCH2 | 1  | 12045817 | p.Arg400Cys  | stop_gained           | TRUE                                                                                                                                                           | G                                                                                                                                              | A      | 23.34% | 0.81% | 287   | 123  | 1.00   | 0.9235 | 0.8343    | Clonal                                                                                            | Likely Pathogenic <td>D</td> <td>PASSENGER/OTHER</td> <td>Passenger</td> <td>TRUE</td> <td>TRUE</td> | D                                                                                            | PASSENGER/OTHER | Passenger       | TRUE      | TRUE |      |
| CCSI | NOTCH2 | 1  | 12046166 | p.Arg193His  | missense_variant      | G                                                                                                                                                              | T                                                                                                                                              | 17.81% | 1.41%  | 219   | 142   | 0.88 | 0.7111 | 0.6456 | Clonal    | Likely Pathogenic <td>D</td> <td>CANCER</td> <td>Driver</td> <td>TRUE</td> <td>TRUE</td>          | D                                                                                                    | CANCER                                                                                       | Driver          | TRUE            | TRUE      |      |      |
| CCSI | NOTCH2 | 1  | 12046207 | p.Ile189Met  | missense_variant      | G                                                                                                                                                              | T                                                                                                                                              | 21.74% | 0.30%  | 345   | 184   | 0.30 | 0.9165 | 0.8181 | Clonal    | Likely Pathogenic <td>D</td> <td>CANCER</td> <td>Driver</td> <td>TRUE</td> <td>TRUE</td>          | D                                                                                                    | CANCER                                                                                       | Driver          | TRUE            | TRUE      |      |      |
| CCSI | NOTCH2 | 1  | 12046436 | p.Arg127Gln  | missense_variant      | G                                                                                                                                                              | A                                                                                                                                              | 20.15% | 0.00%  | 273   | 159   | 1.00 | 0.8651 | 0.7520 | Clonal    | Passenger <td>D</td> <td>PASSENGER/OTHER</td> <td>Passenger</td> <td>TRUE</td> <td>TRUE</td>      | D                                                                                                    | PASSENGER/OTHER                                                                              | Passenger       | TRUE            | TRUE      |      |      |
| CCSI | NOTCH2 | 1  | 12046913 | p.Ala133Cys  | missense_variant      | G                                                                                                                                                              | A                                                                                                                                              | 19.27% | 0.00%  | 327   | 209   | 0.96 | 0.8336 | 0.7421 | Clonal    | Passenger <td>D</td> <td>PASSENGER/OTHER</td> <td>Passenger</td> <td>TRUE</td> <td>TRUE</td>      | D                                                                                                    | PASSENGER/OTHER                                                                              | Passenger       | TRUE            | TRUE      |      |      |
| CCSI | NOTCH2 | 1  | 12049771 | p.Asp136Gln  | missense_variant      | G                                                                                                                                                              | A                                                                                                                                              | 8.98%  | 0.00%  | 227   | 135   | 0.63 | 0.0000 | 0.1228 | Subclonal | Passenger <td>D</td> <td>PASSENGER/OTHER</td> <td>Passenger</td> <td>TRUE</td> <td>TRUE</td>      | D                                                                                                    | PASSENGER/OTHER                                                                              | Passenger       | TRUE            | TRUE      |      |      |
| CCSI | NOTCH2 | 1  | 12049622 | p.Arg75Tyr   | missense_variant      | G                                                                                                                                                              | T                                                                                                                                              | 18.32% | 0.00%  | 191   | 140   | 0.91 | 0.7511 | 0.6488 | Clonal    | Passenger <td>D</td> <td>PASSENGER/OTHER</td> <td>Passenger</td> <td>TRUE</td> <td>TRUE</td>      | D                                                                                                    | PASSENGER/OTHER                                                                              | Passenger       | TRUE            | TRUE      |      |      |
| CCSI | NOTCH2 | 1  | 12049778 | p.Ala92Val   | missense_variant      | G                                                                                                                                                              | A                                                                                                                                              | 18.28% | 0.00%  | 219   | 96    | 0.91 | 0.7485 | 0.6823 | Clonal    | Passenger <td>D</td> <td>PASSENGER/OTHER</td> <td>Passenger</td> <td>TRUE</td> <td>TRUE</td>      | D                                                                                                    | PASSENGER/OTHER                                                                              | Passenger       | TRUE            | TRUE      |      |      |
| CCSI | NOTCH2 | 1  | 12051208 | p.Ala82Met   | missense_variant      | G                                                                                                                                                              | A                                                                                                                                              | 15.88% | 0.00%  | 279   | 162   | 0.98 | 0.8467 | 0.7278 | Clonal    | Passenger <td>D</td> <td>PASSENGER/OTHER</td> <td>Passenger</td> <td>TRUE</td> <td>TRUE</td>      | D                                                                                                    | PASSENGER/OTHER                                                                              | Passenger       | TRUE            | TRUE      |      |      |
| CCSI | NOTCH2 | 1  | 12051233 | p.Gln33Tyr   | missense_variant      | G                                                                                                                                                              | T                                                                                                                                              | 15.28% | 0.00%  | 216   | 134   | 0.76 | 0.3441 | 0.5441 | Subclonal | Passenger <td>D</td> <td>PASSENGER/OTHER</td> <td>Passenger</td> <td>TRUE</td> <td>TRUE</td>      | D                                                                                                    | PASSENGER/OTHER                                                                              | Passenger       | TRUE            | TRUE      |      |      |
| CCSI | NOTCH3 | 19 | 15278999 | p.Ala177Ser  | missense_variant      | C                                                                                                                                                              | T                                                                                                                                              | 19.70% | 1.54%  | 467   | 259   | 0.98 | 0.8717 | 0.7903 | Clonal    | Passenger <td>N</td> <td>PASSENGER/OTHER</td> <td>Passenger</td> <td>TRUE</td> <td>TRUE</td>      | N                                                                                                    | PASSENGER/OTHER                                                                              | Passenger       | TRUE            | TRUE      |      |      |
| CCSI | NOTCH3 | 19 | 15280000 | p.Ser177Ser  | missense_variant      | C                                                                                                                                                              | T                                                                                                                                              | 20.28% | 0.00%  | 401   | 260   | 1.00 | 0.8669 | 0.7990 | Clonal    | Passenger <td>D</td> <td>PASSENGER/OTHER</td> <td>Passenger</td> <td>TRUE</td> <td>TRUE</td>      | D                                                                                                    | PASSENGER/OTHER                                                                              | Passenger       | TRUE            | TRUE      |      |      |
| CCSI | NOTCH3 | 19 | 15284964 | p.Gly156Ile  | missense_variant      | C                                                                                                                                                              | T                                                                                                                                              | 23.81% | 0.00%  | 481   | 300   | 1.00 | 0.9269 | 0.8914 | Clonal    | Passenger <td>D</td> <td>PASSENGER/OTHER</td> <td>Passenger</td> <td>TRUE</td> <td>TRUE</td>      | D                                                                                                    | PASSENGER/OTHER                                                                              | Passenger       | TRUE            | TRUE      |      |      |
| CCSI | NOTCH3 | 19 | 15285030 | p.Ala159Ile  | missense_variant      | C                                                                                                                                                              | T                                                                                                                                              | 23.02% | 0.00%  | 291   | 165   | 1.00 | 0.9229 | 0.8310 | Clonal    | Passenger <td>D</td> <td>PASSENGER/OTHER</td> <td>Passenger</td> <td>TRUE</td> <td>TRUE</td>      | D                                                                                                    | PASSENGER/OTHER                                                                              | Passenger       | TRUE            | TRUE      |      |      |
| CCSI | NOTCH3 | 19 | 15285163 | p.Asp140Tyr  | missense_variant      | C                                                                                                                                                              | T                                                                                                                                              | 7.15%  | 0.80%  | 324   | 194   | 0.60 | 0.0000 | 0.2448 | Subclonal | Passenger <td>D</td> <td>PASSENGER/OTHER</td> <td>Passenger</td> <td>TRUE</td> <td>TRUE</td>      | D                                                                                                    | PASSENGER/OTHER                                                                              | Passenger       | TRUE            | TRUE      |      |      |
| CCSI | NOTCH3 | 19 | 15285172 | p.Asp148Asp  | synonymous_variant    | G                                                                                                                                                              | A                                                                                                                                              | 17.52% | 0.00%  | 411   | 258   | 0.87 | 0.8359 | 0.6938 | Clonal    | Passenger <td>D</td> <td>PASSENGER/OTHER</td> <td>Passenger</td> <td>TRUE</td> <td>TRUE</td>      | D                                                                                                    | PASSENGER/OTHER                                                                              | Passenger       | TRUE            | TRUE      |      |      |
| CCSI | NOTCH3 | 19 | 15296390 | p.Pro68Ala   | synonymous_variant    | LOH                                                                                                                                                            | G                                                                                                                                              | T      | 21.16% | 0.44% | 320   | 229  | 1.00   | 0.9195 | 0.8296    | Clonal                                                                                            | Passenger <td>D</td> <td>PASSENGER/OTHER</td> <td>Passenger</td> <td>TRUE</td> <td>TRUE</td>         | D                                                                                            | PASSENGER/OTHER | Passenger       | TRUE      | TRUE |      |
| CCSI | NOTCH3 | 19 | 15296984 | p.Asp173Val  | splice_region_variant | synonymous_variant                                                                                                                                             | LOH                                                                                                                                            | G      | A      | 9.82% | 0.27% | 470  | 392    | 0.49   | 0.0000    | 0.3742                                                                                            | Subclonal                                                                                            | Passenger <td>D</td> <td>PASSENGER/OTHER</td> <td>Passenger</td> <td>TRUE</td> <td>TRUE</td> | D               | PASSENGER/OTHER | Passenger | TRUE | TRUE |
| CCSI | NOTCH3 | 19 | 32163302 | p.Ala177Val  | missense_variant      | LOH                                                                                                                                                            | G                                                                                                                                              | A      | 34.45% | 0.00% | 119   | 107  | 1.00   | 0.8641 | 0.8296    | Clonal                                                                                            | Likely Pathogenic <td>D</td> <td>CANCER</td> <td>Passenger</td> <td>TRUE</td> <td>TRUE</td>          | D                                                                                            | CANCER          | Passenger       | TRUE      | TRUE |      |
| CCSI | NOTCH4 | 6  | 32166303 | p.Leu151Pro  | missense_variant      | LOH                                                                                                                                                            | G                                                                                                                                              | A      | 29.07% | 0.00% | 258   | 208  | 1.00   | 0.9369 | 0.8499    | Clonal                                                                                            | Passenger <td>N</td> <td>PASSENGER/OTHER</td> <td>Passenger</td> <td>TRUE</td> <td>TRUE</td>         | N                                                                                            | PASSENGER/OTHER | Passenger       | TRUE      | TRUE |      |
| CCSI | NOTCH4 | 6  | 32166714 | p.Ala154Met  | missense_variant      | LOH                                                                                                                                                            | G                                                                                                                                              | A      | 27.02% | 0.00% | 113   | 89   | 0.60   | 0.3461 | 0.4978    | Clonal                                                                                            | Passenger <td>N</td> <td>PASSENGER/OTHER</td> <td>Passenger</td> <td>TRUE</td> <td>TRUE</td>         | N                                                                                            | PASSENGER/OTHER | Passenger       | TRUE      | TRUE |      |
| CCSI | NOTCH4 | 6  | 32185787 | p.Ala53Asp   | synonymous_variant    | LOH                                                                                                                                                            | G                                                                                                                                              | A      | 22.74% | 0.00% | 321   | 259  | 0.90   | 0.9739 | 0.7221    | Clonal                                                                                            | Passenger <td>N</td> <td>PASSENGER/OTHER</td> <td>Passenger</td> <td>TRUE</td> <td>TRUE</td>         | N                                                                                            | PASSENGER/OTHER | Passenger       | TRUE      | TRUE |      |
| CCSI | NOTCH4 | 6  | 32190340 | p.Gln133Cys  | synonymous_variant    | LOH                                                                                                                                                            | G                                                                                                                                              | A      | 22.15% | 0.00% | 299   | 241  | 0.88   | 0.6941 | 0.6938    | Clonal                                                                                            | Passenger <td>D</td> <td>PASSENGER/OTHER</td> <td>Passenger</td> <td>TRUE</td> <td>TRUE</td>         | D                                                                                            | PASSENGER/OTHER | Passenger       | TRUE      | TRUE |      |
| CCSI | NTRK1  | 1  | 14663363 | p.Pro37Tyr   | missense_variant      | LOH                                                                                                                                                            | G                                                                                                                                              | A      | 19.68% | 0.00% | 113   | 89   | 0.60   | 0.7911 | 0.6920    | Clonal                                                                                            | Likely Pathogenic <td>D</td> <td>CANCER</td> <td>Passenger</td> <td>TRUE</td> <td>TRUE</td>          | D                                                                                            | CANCER          | Passenger       | TRUE      | TRUE |      |
| CCSI | NTRK1  | 1  | 14684465 | p.Ser252Ser  | synonymous_variant    | T <td>C</td> <td>21.89%</td> <td>0.00%</td> <td>402</td> <td>214</td> <td>1.00</td> <td>0.9261</td> <td>0.8376</td> <td>Clonal</td> <td>Passenger</td>         | C                                                                                                                                              | 21.89% | 0.00%  | 402   | 214   | 1.00 | 0.9261 | 0.8376 | Clonal    | Passenger                                                                                         | D                                                                                                    | CANCER                                                                                       | Passenger       | TRUE            | TRUE      |      |      |
| CCSI | NTRK2  | 1  | 8707008  | p.Gln64Asp   | missense_variant      | A <td>G</td> <td>26.81%</td> <td>0.00%</td> <td>186</td> <td>88</td> <td>1.00</td> <td>0.8975</td> <td>0.8265</td> <td>Clonal</td> <td>Likely Pathogenic</td>  | G                                                                                                                                              | 26.81% | 0.00%  | 186   | 88    | 1.00 | 0.8975 | 0.8265 | Clonal    | Likely Pathogenic                                                                                 | D                                                                                                    | CANCER                                                                                       | Driver          | TRUE            | TRUE      |      |      |
| CCSI | NTRK2  | 1  | 8808665  | p.Asp116Met  | missense_variant      | A <td>G</td> <td>8.58%</td> <td>0.00%</td> <td>292</td> <td>175</td> <td>0.42</td> <td>0.0000</td> <td>0.2895</td> <td>Subclonal</td> <td>Passenger</td>       | G                                                                                                                                              | 8.58%  | 0.00%  | 292   | 175   | 0.42 | 0.0000 | 0.2895 | Subclonal | Passenger                                                                                         | D                                                                                                    | CANCER                                                                                       | Driver          | TRUE            | TRUE      |      |      |
| CCSI | PKnox1 | 20 | 8520309  | p.Ser61Pro   | missense_variant      | A <td>G</td> <td>22.31%</td> <td>0.00%</td> <td>209</td> <td>118</td> <td>1.00</td> <td>0.8933</td> <td>0.7993</td> <td>Clonal</td> <td>Likely Pathogenic</td> | G                                                                                                                                              | 22.31% | 0.00%  | 209   | 118   | 1.00 | 0.8933 | 0.7993 | Clonal    | Likely Pathogenic                                                                                 | D                                                                                                    | PASSENGER/OTHER                                                                              | Passenger       | TRUE            | TRUE      |      |      |
| CCSI | PKnox1 | 20 | 8568988  | p.Ser61Pro   | missense_variant      | A <td>G</td> <td>22.31%</td> <td>0.00%</td> <td>209</td> <td>118</td> <td>1.00</td> <td>0.8933</td> <td>0.7993</td> <td>Clonal</td> <td>Likely Pathogenic</td> | G                                                                                                                                              | 22.31% | 0.00%  | 209   | 118   | 1.00 | 0.8933 | 0.7993 | Clonal    | Likely Pathogenic                                                                                 | D                                                                                                    | PASSENGER/OTHER                                                                              | Passenger       | TRUE            | TRUE      |      |      |
| CCSI | PKnox1 | 20 | 8561383  | p.Ser133Ser  | synonymous_variant    | G                                                                                                                                                              | A                                                                                                                                              | 15.84% | 0.55%  | 303   | 155   | 0.75 | 0.3634 | 0.5976 | Subclonal | Passenger <td>D</td> <td>PASSENGER/OTHER</td> <td>Passenger</td> <td>TRUE</td> <td>TRUE</td>      | D                                                                                                    | PASSENGER/OTHER                                                                              | Passenger       | TRUE            | TRUE      |      |      |
| CCSI | PALB2  | 16 | 23646582 | p.Gln37Tyr   | missense_variant      | C                                                                                                                                                              | A                                                                                                                                              | 5.67%  | 0.00%  | 141   | 60    | 0.28 | 0.0000 | 0.1408 | Subclonal | Passenger <td>D</td> <td>PASSENGER/OTHER</td> <td>Passenger</td> <td>TRUE</td> <td>TRUE</td>      | D                                                                                                    | PASSENGER/OTHER                                                                              | Passenger       | TRUE            | TRUE      |      |      |
| CCSI | PALB2  | 16 | 23646582 | p.Ser148Ser  | missense_variant      | C                                                                                                                                                              | T                                                                                                                                              | 19.48% | 0.00%  | 257   | 153   | 0.97 | 0.8207 | 0.7215 | Clonal    | Passenger <td>D</td> <td>PASSENGER/OTHER</td> <td>Passenger</td> <td>TRUE</td> <td>TRUE</td>      | D                                                                                                    | PASSENGER/OTHER                                                                              | Passenger       | TRUE            | TRUE      |      |      |
| CCSI | PALB2  | 16 | 23647187 | p.Asp224Asp  | synonymous_variant    | C                                                                                                                                                              | T                                                                                                                                              | 19.48% | 0.00%  | 257   | 153   | 0.97 | 0.8207 | 0.7215 | Clonal    | Passenger <td>D</td> <td>PASSENGER/OTHER</td> <td>Passenger</td> <td>TRUE</td> <td>TRUE</td>      | D                                                                                                    | PASSENGER/OTHER                                                                              | Passenger       | TRUE            | TRUE      |      |      |
| CCSI | PARK2  | 6  | 16220934 | p.Arg24Pro   | synonymous_variant    | G                                                                                                                                                              | A                                                                                                                                              | 21.29% | 1.00%  | 155   | 92    | 1.00 | 0.8586 | 0.7120 | Clonal    | Passenger <td>D</td> <td>PASSENGER/OTHER</td> <td>Passenger</td> <td>TRUE</td> <td>TRUE</td>      | D                                                                                                    | PASSENGER/OTHER                                                                              | Passenger       | TRUE            | TRUE      |      |      |
| CCSI | PARK2  | 6  | 16220934 | p.Ala22Met   | missense_variant      | G                                                                                                                                                              | A                                                                                                                                              | 16.37% | 0.00%  | 123   | 69    | 0.63 | 0.0000 | 0.1489 | Subclonal | Passenger <td>D</td> <td>PASSENGER/OTHER</td> <td>Passenger</td> <td>TRUE</td> <td>TRUE</td>      | D                                                                                                    | PASSENGER/OTHER                                                                              | Passenger       | TRUE            | TRUE      |      |      |
| CCSI | PARK2  | 6  | 16220934 | p.Asp24Tyr   | missense_variant      | G                                                                                                                                                              | A                                                                                                                                              | 20.33% | 0.52%  | 300   | 192   | 1.00 | 0.8787 | 0.7696 | Clonal    | Passenger <td>D</td> <td>PASSENGER/OTHER</td> <td>Passenger</td> <td>TRUE</td> <td>TRUE</td>      | D                                                                                                    | PASSENGER/OTHER                                                                              | Passenger       | TRUE            | TRUE      |      |      |
| CCSI | PARK2  | 6  | 16220934 | p.Ala22Met   | missense_variant      | G                                                                                                                                                              | A                                                                                                                                              | 16.37% | 0.00%  | 123   | 69    | 0.63 | 0.0000 | 0.1489 | Subclonal | Passenger <td>D</td> <td>PASSENGER/OTHER</td> <td>Passenger</td> <td>TRUE</td> <td>TRUE</td>      | D                                                                                                    | PASSENGER/OTHER                                                                              | Passenger       | TRUE            | TRUE      |      |      |
| CCSI | PARK2  | 6  | 16220934 | p.Asp24Tyr   | missense_variant      | G                                                                                                                                                              | A                                                                                                                                              | 20.33% | 0.52%  | 300   | 192   | 1.00 | 0.8787 | 0.7696 | Clonal    | Passenger <td>D</td> <td>PASSENGER/OTHER</td> <td>Passenger</td> <td>TRUE</td> <td>TRUE</td>      | D                                                                                                    | PASSENGER/OTHER                                                                              | Passenger       | TRUE            | TRUE      |      |      |
| CCSI | PARK2  | 6  | 16220934 | p.Asp24Tyr   | missense_variant      | G                                                                                                                                                              | A                                                                                                                                              | 20.33% | 0.52%  | 300   | 192   | 1.00 | 0.8787 | 0.7696 | Clonal    | Passenger <td>D</td> <td>PASSENGER/OTHER</td> <td>Passenger</td> <td>TRUE</td> <td>TRUE</td>      | D                                                                                                    | PASSENGER/OTHER                                                                              | Passenger       | TRUE            | TRUE      |      |      |
| CCSI | PARK2  | 6  | 16220934 | p.Asp24Tyr   | missense_variant      | G                                                                                                                                                              | A                                                                                                                                              | 20.33% | 0.52%  | 300   | 192   | 1.00 | 0.8787 | 0.7696 | Clonal    | Passenger <td>D</td> <td>PASSENGER/OTHER</td> <td>Passenger</td> <td>TRUE</td> <td>TRUE</td>      | D                                                                                                    | PASSENGER/OTHER                                                                              | Passenger       | TRUE            | TRUE      |      |      |
| CCSI | PARK2  | 6  | 16220934 | p.Asp24Tyr   | missense_variant      | G                                                                                                                                                              | A                                                                                                                                              | 20.33% | 0.52%  | 300   | 192   | 1.00 | 0.8787 | 0.7696 | Clonal    | Passenger <td>D</td> <td>PASSENGER/OTHER</td> <td>Passenger</td> <td>TRUE</td> <td>TRUE</td>      | D                                                                                                    | PASSENGER/OTHER                                                                              | Passenger       | TRUE            | TRUE      |      |      |
| CCSI | PARK2  | 6  | 16220934 | p.Asp24Tyr   | missense_variant      | G                                                                                                                                                              | A                                                                                                                                              | 20.33% | 0.52%  | 300   | 192   | 1.00 | 0.8787 | 0.7696 | Clonal    | Passenger <td>D</td> <td>PASSENGER/OTHER</td> <td>Passenger</td> <td>TRUE</td> <td>TRUE</td>      | D                                                                                                    | PASSENGER/OTHER                                                                              | Passenger       | TRUE            | TRUE      |      |      |
| CCSI | PARK2  | 6  | 16220934 | p.Asp24Tyr   | missense_variant      | G                                                                                                                                                              | A                                                                                                                                              | 20.33% | 0.52%  | 300   | 192   | 1.00 | 0.8787 | 0.7696 | Clonal    | Passenger <td>D</td> <td>PASSENGER/OTHER</td> <td>Passenger</td> <td>TRUE</td> <td>TRUE</td>      | D                                                                                                    | PASSENGER/OTHER                                                                              | Passenger       | TRUE            | TRUE      |      |      |
| CCSI | PARK2  | 6  | 16220934 | p.Asp24Tyr   | missense_variant      | G                                                                                                                                                              | A                                                                                                                                              | 20.33% | 0.52%  | 300   | 192   | 1.00 | 0.8787 | 0.7696 | Clonal    | Passenger <td>D</td> <td>PASSENGER/OTHER</td> <td>Passenger</td> <td>TRUE</td> <td>TRUE</td>      | D                                                                                                    | PASSENGER/OTHER                                                                              | Passenger       | TRUE            | TRUE      |      |      |
| CCSI | PARK2  | 6  | 16220934 | p.Asp24Tyr   | missense_variant      | G                                                                                                                                                              | A                                                                                                                                              | 20.33% | 0.52%  | 300   | 192   | 1.00 |        |        |           |                                                                                                   |                                                                                                      |                                                                                              |                 |                 |           |      |      |

| CC31 | SNHG    | 1  | 17356577 | p.Thc8Thr    | synonymous_variant | G  | T | 15.82% | 0.94% | 397 | 212 | 0.78 | 0.2289 | 0.6108 | Subclonal | Passenger         | D | PASSSENGER/OTHER | Passenger | TRUE | TRUE | TRUE | TRUE |
|------|---------|----|----------|--------------|--------------------|----|---|--------|-------|-----|-----|------|--------|--------|-----------|-------------------|---|------------------|-----------|------|------|------|------|
| CC31 | SETD2   | 3  | 47125634 | p.Arg197His  | missense_variant   | C  | T | 4.23%  | 0.00% | 189 | 119 | 0.21 | 0.0000 | 0.1033 | Subclonal | Passenger         | D | PASSSENGER/OTHER | Passenger | TRUE | TRUE | TRUE | TRUE |
| CC31 | SETD2   | 3  | 47188224 | p.Arg1482Gln | missense_variant   | C  | T | 9.38%  | 0.00% | 256 | 205 | 0.47 | 0.0001 | 0.3122 | Subclonal | Passenger         | D | PASSSENGER/OTHER | Passenger | TRUE | TRUE | TRUE | TRUE |
| CC31 | SETD2   | 3  | 47188228 | p.Arg1482Gln | stop_gain          | G  | A | 1.00%  | 0.00% | 132 | 132 | 0.62 | 0.0000 | 0.6403 | Clonal    | Passenger         | A |                  |           | TRUE | TRUE | TRUE | TRUE |
| CC31 | SF3B1   | 2  | 18828792 | p.Glu1061Glu | synonymous_variant | C  | T | 17.88% | 0.38% | 380 | 267 | 0.89 | 0.1726 | 0.7066 | Clonal    | Passenger         | D |                  |           | TRUE | TRUE | TRUE | TRUE |
| CC31 | SF3B1   | 2  | 18828793 | p.Glu809Asp  | missense_variant   | C  | A | 5.26%  | 0.35% | 437 | 289 | 0.26 | 0.0000 | 0.1708 | Clonal    | Likely Pathogenic | D | CANCER           | Passenger | TRUE | TRUE | TRUE | TRUE |
| CC31 | SF3B1   | 2  | 18828794 | p.Glu809Asp  | missense_variant   | C  | A | 22.03% | 0.00% | 454 | 246 | 1.00 | 0.0001 | 0.8413 | Clonal    | Passenger         | D | PASSSENGER/OTHER | Passenger | TRUE | TRUE | TRUE | TRUE |
| CC31 | SHQ1    | 3  | 72866403 | p.Arg27His   | missense_variant   | C  | T | 22.22% | 0.00% | 306 | 171 | 1.00 | 0.9175 | 0.8180 | Clonal    | Passenger         | D | PASSSENGER/OTHER | Passenger | TRUE | TRUE | TRUE | TRUE |
| CC31 | SMAD2   | 18 | 45395764 | p.Pro124Ser  | missense_variant   | C  | T | 17.00% | 0.75% | 229 | 133 | 0.89 | 0.1705 | 0.6540 | Clonal    | Likely Pathogenic | D | CANCER           | Passenger | TRUE | TRUE | TRUE | TRUE |
| CC31 | SMAD2   | 18 | 45395765 | p.Ser115Ser  | synonymous_variant | C  | A | 5.21%  | 0.00% | 211 | 119 | 0.25 | 0.0000 | 0.1417 | Subclonal | Passenger         | D |                  |           | TRUE | TRUE | TRUE | TRUE |
| CC31 | SMAD3   | 15 | 67457653 | p.Arg159Asn  | missense_variant   | G  | A | 19.27% | 0.00% | 654 | 398 | 0.96 | 0.8550 | 0.8016 | Clonal    | Likely Pathogenic | D | CANCER           | Passenger | TRUE | TRUE | TRUE | TRUE |
| CC31 | SMAD3   | 15 | 67473723 | p.Arg230Gln  | missense_variant   | G  | A | 9.92%  | 0.00% | 484 | 300 | 0.47 | 0.0000 | 0.3038 | Subclonal | Likely Pathogenic | D | CANCER           | Passenger | TRUE | TRUE | TRUE | TRUE |
| CC31 | SMAD4   | 19 | 48584504 | p.Arg270Val  | missense_variant   | T  | T | 7.67%  | 0.00% | 194 | 108 | 0.36 | 0.0001 | 0.2038 | Subclonal | Likely Pathogenic | D | CANCER           | Passenger | TRUE | TRUE | TRUE | TRUE |
| CC31 | SMARCA4 | 19 | 11094934 | p.Pro31Leu   | missense_variant   | G  | T | 25.75% | 0.00% | 299 | 219 | 1.00 | 0.8697 | 0.8758 | Clonal    | Likely Pathogenic | D | CANCER           | Passenger | TRUE | TRUE | TRUE | TRUE |
| CC31 | SMARCA4 | 19 | 11094964 | p.Ser49Ile   | missense_variant   | G  | T | 9.73%  | 0.00% | 298 | 227 | 0.48 | 0.0000 | 0.3098 | Subclonal | Passenger         | D | PASSSENGER/OTHER | Passenger | TRUE | TRUE | TRUE | TRUE |
| CC31 | SMARCA4 | 19 | 11095043 | p.Met70Ile   | missense_variant   | C  | A | 19.70% | 0.30% | 401 | 288 | 0.98 | 0.8676 | 0.7779 | Clonal    | Passenger         | D | PASSSENGER/OTHER | Passenger | TRUE | TRUE | TRUE | TRUE |
| CC31 | SMARCA4 | 19 | 11095893 | p.Glu128Asp  | missense_variant   | G  | T | 19.86% | 0.30% | 521 | 329 | 0.99 | 0.8929 | 0.8157 | Clonal    | Passenger         | D | PASSSENGER/OTHER | Passenger | TRUE | TRUE | TRUE | TRUE |
| CC31 | SMARCA4 | 19 | 11103597 | p.Arg90Iyr   | missense_variant   | G  | T | 7.74%  | 0.00% | 452 | 275 | 0.38 | 0.0000 | 0.2739 | Subclonal | Passenger         | D | PASSSENGER/OTHER | Passenger | TRUE | TRUE | TRUE | TRUE |
| CC31 | SMARCA4 | 19 | 11144146 | p.Arg124Ile  | missense_variant   | C  | T | 23.92% | 0.63% | 430 | 319 | 1.00 | 0.9414 | 0.8881 | Clonal    | Likely Pathogenic | D | CANCER           | Passenger | TRUE | TRUE | TRUE | TRUE |
| CC31 | SMARCA4 | 19 | 11144517 | p.Pro128Ser  | synonymous_variant | C  | T | 5.33%  | 0.43% | 729 | 466 | 0.27 | 0.0000 | 0.1907 | Subclonal | Passenger         | D |                  |           | TRUE | TRUE | TRUE | TRUE |
| CC31 | SMARCA4 | 19 | 11150223 | p.Arg142Asn  | synonymous_variant | C  | A | 16.14% | 0.33% | 502 | 304 | 0.80 | 0.2423 | 0.6486 | Subclonal | Passenger         | D |                  |           | TRUE | TRUE | TRUE | TRUE |
| CC31 | SMARCA4 | 19 | 11176648 | p.Arg161Tyr  | synonymous_variant | A  | A | 16.77% | 0.00% | 488 | 284 | 0.83 | 0.4333 | 0.3692 | Subclonal | Passenger         | D |                  |           | TRUE | TRUE | TRUE | TRUE |
| CC31 | SMARCB1 | 22 | 24167350 | p.Arg132Thr  | missense_variant   | G  | A | 5.00%  | 0.00% | 360 | 205 | 0.25 | 0.0000 | 0.1034 | Subclonal | Likely Pathogenic | D | CANCER           | Passenger | TRUE | TRUE | TRUE | TRUE |
| CC31 | SMD     | 7  | 12862972 | p.Gly4Asp    | missense_variant   | G  | A | 3.18%  | 0.00% | 377 | 223 | 0.16 | 0.0000 | 0.0692 | Subclonal | Passenger         | D | PASSSENGER/OTHER | Passenger | TRUE | TRUE | TRUE | TRUE |
| CC31 | SMD     | 7  | 12865131 | p.Arg65His   | missense_variant   | G  | A | 17.80% | 0.67% | 472 | 299 | 0.88 | 0.8702 | 0.7165 | Clonal    | Passenger         | D | PASSSENGER/OTHER | Passenger | TRUE | TRUE | TRUE | TRUE |
| CC31 | SMD     | 7  | 12865203 | p.Pro68Ile   | frameshift_variant | AC | A | 18.32% | 0.27% | 644 | 375 | 0.91 | 0.7372 | 0.7618 | Clonal    | Likely Pathogenic | D | CANCER           | Passenger | TRUE | TRUE | TRUE | TRUE |
| CC31 | SRC     | 20 | 3012635  | p.Arg27Thr   | missense_variant   | C  | A | 30.28% | 0.30% | 109 | 81  | 1.00 | 0.7723 | 0.8168 | Clonal    | Passenger         | N | PASSSENGER/OTHER | Passenger | TRUE | TRUE | TRUE | TRUE |
| CC31 | SRC     | 20 | 3014503  | p.Leu101Leu  | synonymous_variant | C  | C | 6.26%  | 0.00% | 231 | 268 | 0.31 | 0.0000 | 0.2108 | Subclonal | Passenger         | D |                  |           | TRUE | TRUE | TRUE | TRUE |
| CC31 | SRC     | 20 | 3022235  | p.Gly130Asn  | missense_variant   | A  | A | 18.29% | 0.00% | 525 | 309 | 0.91 | 0.7475 | 0.7464 | Clonal    | Passenger         | D | PASSSENGER/OTHER | Passenger | TRUE | TRUE | TRUE | TRUE |
| CC31 | SRC     | 20 | 3031742  | p.Trp246Met  | missense_variant   | C  | T | 19.80% | 0.27% | 607 | 373 | 0.99 | 0.8024 | 0.8188 | Clonal    | Passenger         | D | PASSSENGER/OTHER | Passenger | TRUE | TRUE | TRUE | TRUE |
| CC31 | STAT3   | X  | 12318602 | p.Arg37Gln   | missense_variant   | G  | A | 18.83% | 0.85% | 377 | 234 | 0.93 | 0.8045 | 0.7386 | Clonal    | Passenger         | D | PASSSENGER/OTHER | Passenger | TRUE | TRUE | TRUE | TRUE |
| CC31 | STAT3   | X  | 12319005 | p.Arg42Thr   | missense_variant   | G  | A | 7.24%  | 0.00% | 373 | 242 | 0.36 | 0.0000 | 0.2444 | Subclonal | Passenger         | D | PASSSENGER/OTHER | Passenger | TRUE | TRUE | TRUE | TRUE |
| CC31 | STK11   | 19 | 1237052  | p.Gln24Ile   | missense_variant   | C  | T | 20.13% | 0.00% | 254 | 228 | 0.86 | 0.9153 | 0.8378 | Clonal    | Likely Pathogenic | D | CANCER           | Passenger | TRUE | TRUE | TRUE | TRUE |
| CC31 | STK11   | 19 | 1221971  | p.Lys256Asn  | missense_variant   | G  | T | 19.76% | 0.00% | 582 | 412 | 0.98 | 0.8836 | 0.8106 | Clonal    | Passenger         | D | PASSSENGER/OTHER | Passenger | TRUE | TRUE | TRUE | TRUE |
| CC31 | STK11   | 19 | 1223054  | p.Arg331Trp  | missense_variant   | C  | T | 20.28% | 0.00% | 688 | 468 | 1.00 | 0.9127 | 0.8400 | Clonal    | Likely Pathogenic | D | CANCER           | Passenger | TRUE | TRUE | TRUE | TRUE |
| CC31 | SYK     | 9  | 9363453  | p.Arg142Gln  | missense_variant   | C  | T | 20.28% | 0.00% | 688 | 468 | 1.00 | 0.9127 | 0.8400 | Clonal    | Likely Pathogenic | D | CANCER           | Passenger | TRUE | TRUE | TRUE | TRUE |
| CC31 | SYK     | 9  | 9363888  | p.Asn408Asn  | synonymous_variant | C  | T | 17.30% | 0.47% | 310 | 213 | 0.86 | 0.6101 | 0.6759 | Clonal    | Passenger         | D |                  |           | TRUE | TRUE | TRUE | TRUE |
| CC31 | TBK1    | 12 | 64860749 | p.Arg142Cys  | missense_variant   | C  | T | 18.88% | 0.42% | 359 | 237 | 0.91 | 0.7630 | 0.7170 | Clonal    | Passenger         | D | PASSSENGER/OTHER | Passenger | TRUE | TRUE | TRUE | TRUE |
| CC31 | TBK1    | 12 | 64869203 | p.Arg142Cys  | missense_variant   | C  | T | 22.76% | 0.00% | 430 | 259 | 1.00 | 0.9384 | 0.8480 | Clonal    | Passenger         | D | PASSSENGER/OTHER | Passenger | TRUE | TRUE | TRUE | TRUE |
| CC31 | TBK1    | 12 | 6489098  | p.Gln33Gln   | synonymous_variant | A  | A | 19.19% | 0.48% | 370 | 209 | 0.95 | 0.8301 | 0.7499 | Clonal    | Passenger         | D |                  |           | TRUE | TRUE | TRUE | TRUE |
| CC31 | TBK1    | 12 | 64891510 | p.Arg681Ser  | missense_variant   | A  | G | 19.38% | 0.00% | 280 | 195 | 0.96 | 0.8312 | 0.7915 | Clonal    | Passenger         | D | PASSSENGER/OTHER | Passenger | TRUE | TRUE | TRUE | TRUE |
| CC31 | TEK     | 9  | 9261934  | p.Glu169Asp  | missense_variant   | A  | G | 7.67%  | 0.00% | 374 | 229 | 0.36 | 0.0000 | 0.2424 | Subclonal | Likely Pathogenic | D | CANCER           | Passenger | TRUE | TRUE | TRUE | TRUE |
| CC31 | TEK     | 9  | 92718816 | p.Arg171     | stop_gain          | C  | T | 5.67%  | 0.00% | 194 | 79  | 0.28 | 0.0000 | 0.1545 | Subclonal | Passenger         | A |                  |           | TRUE | TRUE | TRUE | TRUE |
| CC31 | TEK     | 9  | 92718904 | p.Glu169Lys  | missense_variant   | A  | G | 7.66%  | 0.00% | 225 | 133 | 0.37 | 0.0000 | 0.2224 | Subclonal | Passenger         | D | PASSSENGER/OTHER | Passenger | TRUE | TRUE | TRUE | TRUE |
| CC31 | TEK     | 9  | 9272014  | p.Ser49Phe   | missense_variant   | A  | G | 4.82%  | 0.00% | 242 | 141 | 0.24 | 0.0000 | 0.2424 | Subclonal | Passenger         | D | PASSSENGER/OTHER | Passenger | TRUE | TRUE | TRUE | TRUE |
| CC31 | TEK     | 9  | 9272111  | p.Val79Ile   | missense_variant   | C  | T | 7.01%  | 0.49% | 613 | 408 | 0.35 | 0.0000 | 0.2654 | Subclonal | Passenger         | D | PASSSENGER/OTHER | Passenger | TRUE | TRUE | TRUE | TRUE |
| CC31 | TEK     | 9  | 9272180  | p.His74Ser   | missense_variant   | A  | A | 16.63% | 0.36% | 403 | 290 | 0.83 | 0.4150 | 0.6662 | Subclonal | Passenger         | D |                  |           | TRUE | TRUE | TRUE | TRUE |
| CC31 | TEK     | 9  | 9272181  | p.Trp41Ile   | missense_variant   | C  | T | 22.76% | 0.00% | 430 | 259 | 1.00 | 0.9384 | 0.8480 | Subclonal | Passenger         | D |                  |           | TRUE | TRUE | TRUE | TRUE |
| CC31 | TEK     | 9  | 9272993  | p.Gly33Gln   | synonymous_variant | G  | A | 5.46%  | 0.00% | 313 | 360 | 0.27 | 0.0000 | 0.1837 | Subclonal | Passenger         | D |                  |           | TRUE | TRUE | TRUE | TRUE |
| CC31 | TEK     | 9  | 9273195  | p.Arg28Ser   | missense_variant   | C  | T | 21.00% | 0.00% | 321 | 207 | 1.00 | 0.9085 | 0.8055 | Clonal    | Passenger         | N | PASSSENGER/OTHER | Passenger | TRUE | TRUE | TRUE | TRUE |
| CC31 | TEK     | 9  | 9273317  | p.Met69Phe   | missense_variant   | A  | A | 4.82%  | 0.00% | 253 | 141 | 0.24 | 0.0000 | 0.1336 | Subclonal | Passenger         | D | PASSSENGER/OTHER | Passenger | TRUE | TRUE | TRUE | TRUE |
| CC31 | TEK     | 9  | 9273383  | p.Arg50P     | stop_gain          | C  | T | 15.23% | 1.73% | 111 | 114 | 0.76 | 0.4476 | 0.5068 | Subclonal | Passenger         | A |                  |           | TRUE | TRUE | TRUE | TRUE |
| CC31 | TEK     | 9  | 9273402  | p.Arg50P     | stop_gain          | C  | T | 15.23% | 1.73% | 111 | 114 | 0.76 | 0.4476 | 0.5068 | Subclonal | Passenger         | A |                  |           | TRUE | TRUE | TRUE | TRUE |
| CC31 | TEK     | 9  | 9273403  | p.Arg50P     | stop_gain          | C  | T | 15.23% | 1.73% | 111 | 114 | 0.76 | 0.4476 | 0.5068 | Subclonal | Passenger         | A |                  |           | TRUE | TRUE | TRUE | TRUE |
| CC31 | TEK     | 9  | 9273404  | p.Arg50P     | stop_gain          | C  | T | 15.23% | 1.73% | 111 | 114 | 0.76 | 0.4476 | 0.5068 | Subclonal | Passenger         | A |                  |           | TRUE | TRUE | TRUE | TRUE |
| CC31 | TEK     | 9  | 9273405  | p.Arg50P     | stop_gain          | C  | T | 15.23% | 1.73% | 111 | 114 | 0.76 | 0.4476 | 0.5068 | Subclonal | Passenger         | A |                  |           | TRUE | TRUE | TRUE | TRUE |
| CC31 | TEK     | 9  | 9273406  | p.Arg50P     | stop_gain          | C  | T | 15.23% | 1.73% | 111 | 114 |      |        |        |           |                   |   |                  |           |      |      |      |      |
